## **Pre-Implantation Alcohol Exposure Induces Lasting Sex-Specific DNA Methylation Programming Errors in the Developing Forebrain**

Legault LM<sup>1,2</sup>, Doiron K<sup>1</sup>, Breton-Larrivée M<sup>1,2</sup>, Langford-Avelar A<sup>1,2</sup>, Lemieux A<sup>1,2</sup>, Caron M<sup>1</sup>, Jerome-Majewska LA<sup>3,4</sup>, Sinnott D<sup>1,5</sup>, McGraw S<sup>1,2,6,#</sup>.

<sup>1</sup>CHU Sainte-Justine Research Center, Montreal, Canada.

<sup>2</sup>Department of Biochemistry and Molecular Medicine, Université de Montréal, Montreal, Canada.

<sup>3</sup>McGill University Health Centre Glen Site, Montreal, Canada.

<sup>4</sup>Department of Pediatrics, McGill University, Montreal, Canada.

<sup>5</sup>Department of Pediatrics, Université de Montréal, Montreal, Canada.

<sup>6</sup>Department of Obstetrics and Gynecology, Université de Montréal, Montreal, Canada.

#Corresponding author: [serge.mcgraw@umontreal.ca](mailto:serge.mcgraw@umontreal.ca)

## ABSTRACT

Prenatal alcohol exposure is recognized for altering DNA methylation profiles of brain cells during development, and to be part of the molecular basis underpinning Fetal Alcohol Spectrum Disorder (FASD) etiology. However, we have negligible information on the effects of alcohol exposure during pre-implantation, the early embryonic window marked with dynamic DNA methylation reprogramming, and on how this may rewire the brain developmental program. Using a pre-clinical *in vivo* mouse model, we show that pre-implantation alcohol exposure leads to adverse developmental outcomes that replicate clinical characteristics observed in children with FASD. Genome-wide DNA methylation analyses of fetal forebrains uncovered sex-specific alterations, including partial loss of DNA methylation maintenance at imprinting control regions, and abnormal *de novo* DNA methylation profiles in various biological pathways (e.g., neural/brain development). These findings support the contribution of alcohol-induced DNA methylation programming deviations during pre-implantation to the manifestation of neurodevelopmental phenotypes associated with FASD.

## INTRODUCTION

Fetal Alcohol Spectrum Disorders (FASD) encompasses the range of lifelong cognitive and physical disabilities observed in children born to mothers who consumed alcohol during pregnancy (Cook et al., 2016; L. M. Legault, Bertrand-Lehouillier, & McGraw, 2018; May et al., 2014; Welch-Carre, 2005). Each year, 600 000 to 1 million children are born with FASD worldwide (Lange et al., 2017; Popova, Lange, Probst, Gmel, & Rehm, 2017). The most severe and physically visible form of the condition is known as Fetal Alcohol Syndrome (FAS), in ~10% of FASD cases, and associated with the full presentation of dysmorphic features including craniofacial malformations, growth deficits and structural brain pathologies. Depending on the amount, pattern and developmental period of prenatal alcohol exposure, children may not present with dysmorphic features, but still suffer from mild to severe FASD-related neurological disabilities, such as learning deficits and intellectual delays (May et al., 2014; Welch-Carre, 2005). With the marked increase in rates of alcohol use and binge drinking behavior (Dwyer-Lindgren et al., 2015) among 18-34 year old women (Grucza, Norberg, Bucholz, & Bierut, 2008; Lim et al., 2012; Popova, Lange, Probst, Parunashvili, & Rehm, 2016; Popova, Lange, Probst, Shield, et al., 2016; C. H. Tan, Denny, Cheal, Sniezek, & Kanny, 2015; Thomas, 2012; Wilsnack, Wilsnack, & Kantor, 2013), added to the high number of unintended pregnancies worldwide (~40%; 85 million/year (Sedgh, Singh, & Hussain, 2014)), many women may inadvertently subject their developing embryos to acute levels of alcohol in first weeks of pregnancy. Although most studies state that alcohol consumption at all stages of pregnancy can cause FASD, pre-implantation is arguably the stage that is most prone to unintentional prenatal alcohol exposure since the human chorionic gonadotrophin (hCG) hormone, the main biomarker for pregnancy, is not yet detectable as it is only produced following implantation. Still, there is ample misinformation in the literature regarding the effects of alcohol exposure, and many other teratogen exposures, on pre-implantation embryos, and how this leads to an “*all-or-nothing*” developmental outcome.

An increasing body of evidence indicates that alcohol exposure during fetal brain development triggers lasting epigenetic alterations, including DNA methylation, in offspring long after the initial insult, supporting the role of epigenetics in FASD phenotypes (Chater-Diehl, Laufer, Castellani, Alberry, & Singh, 2016; Garro, McBeth, Lima, & Lieber, 1991; Laufer et al., 2015; Öztürk, Resendiz, Öztürk, & Zhou, 2017). However, we remain unaware of how ethanol affects the early developmental window marked with dynamic changes in DNA methylation, and how interfering with this fundamental process may program future FASD-related neurological disabilities. During pre-implantation development, the period between oocyte fertilization and embryo implantation in the uterus, the epigenome undergoes a broad reprogramming that initiates the developmental program (Breton-Larrivée, Elder, & McGraw, 2019; Farthing et al., 2008; S. McGraw et al., 2013; Serge McGraw & Trasler, 2013; Oswald et al., 2000; Peat et al., 2014; Zhu et al., 2018). We and others have shown that this essential reprogramming wave removes most DNA methylation signatures across the genome, except specific sequences that include imprinting control regions (ICRs), to trigger the embryonic developmental program (S. McGraw et al., 2013; S. McGraw et al., 2015; Messerschmidt, Knowles, & Solter, 2014; Reik, Dean, & Walter, 2001). DNA methylation marks are then reacquired in a sex-, cell- and tissue-specific manner during the peri-implantation period, and marks continue to be modulated during lineage specification (Kazakevych, Sayols, Messner, Krienke, & Soshnikova, 2017; Liu et al., 2019; Sanosaka et al., 2017; Zhang et al., 2018). Studies show that pre-implantation embryos can have sex-specific epigenetic responses to similar environmental challenges, leading to long-term sexual dimorphism in developmental programming trajectories (Bermejo-Alvarez, Rizos, Lonergan, & Gutierrez-Adan, 2011; Donjacour, Liu, Lin, Simbulan, & Rinaudo, 2014; Lowe, Gemma, Rakyan, & Holland, 2015; Pérez-Cerezales et al., 2018).

One of the first indications of the direct link between ethanol exposure and aberrations in DNA methylation came from a mouse study showing that mid-gestation exposure at E9-E11 reduced global DNA methylation levels in E11 fetuses (Garro et al., 1991). This evidence gave rise to different FASD models using various levels of short or prolonged alcohol exposures at different stages of gestation.

Ethanol exposure can either induce DNA methyltransferases (DNMTs) activity, through reactive oxygen species-dependent mechanisms (Miozzo et al., 2018; Wu & Cederbaum, 2003), or inhibit DNMTs activity, via direct action on DNMTs or on one-carbon metabolism that provides methyl groups (Garro et al., 1991; Mandal, Halder, Jung, & Chai, 2017), which supports why both gain and loss of DNA methylation marks can be observed in FASD models. High levels of ethanol exposure on two consecutive days (E1.5, E2.5) altered DNA methylation of imprinted gene *H19*, a negative regulator of growth and proliferation, in the placenta at E10.5, yet this region showed no alteration in the embryo (Haycock & Ramsay, 2009). Nonetheless, data remain very scarce on how alcohol exposure during the early stages of embryo development directly affects epigenetic reprogramming and permanently alters genome-wide DNA methylation.

In this study, we used a pre-clinical mouse model of prenatal alcohol exposure to specifically target pre-implantation embryos that are undergoing their epigenetic reprogramming wave. We show that this exposure leads to a surge in morphological brain defects during fetal life, and that exposed embryos with no visible abnormalities or developmental delays present lasting DNA methylation alterations in forebrain tissues, including sex-specific disparities in DNA methylation dysregulation.

## **RESULTS**

### ***Modeling early pre-implantation alcohol exposure increases phenotypic alterations in developing embryos.***

To define the developmental and epigenetic (i.e., DNA methylation) impact of a binge alcohol exposure episode on early embryos undergoing the epigenetic reprogramming wave, we first established a pre-clinical mouse model to specifically expose pre-implantation embryos (E2.5) to short, but elevated alcohol levels. To avoid possible confounding effects of gavage-associated stress, we used a well-recognized two-injection paradigm (Boschen, Criss, Palamarchouk, Roth, & Klintsova, 2015; Mantha,

Laufer, & Singh, 2014; Patten, Fontaine, & Christie, 2014; Perkins, Lehmann, Lawrence, & Kelly, 2013). Pregnant mice (C57BL/6) were subcutaneously injected at E2.5 (8-cell embryos) with two doses of 2.5g/kg ethanol (**EtOH-exposed**), or 0.15M saline (**control**), at 2h intervals (**Fig. 1A**). Pregnant females reached a peak blood alcohol concentration (**BAC**) of 284.27mg/dL (3h) with an average of 158.31mg/dL over a 4h window (**Fig. 1B**). In contrast with other chronic prenatal alcohol exposure models (E. Abel, 1978; El Shawa, Abbott, & Huffman, 2013; Ghimire et al., 2008; Sulik, Johnston, & Webb, 1981), this short but acute level of ethanol exposure on pre-implantation embryos did not affect average mid-gestational (E10.5) litter size (Ctrl;  $n=8.13 \pm 2.58$  vs EtOH-exposed;  $n=7.91 \pm 2.86$ ), or sex distribution (Ctrl and EtOH-exposed; 49% female vs 51% males). Similarly, early pre-implantation embryos subjected to binge-like alcohol levels did not show differences in mean morphological measurements at E10.5, however, we observed a significant increase in embryo-to-embryo variability for crown to rump length ( $p<0.0001$ ), head height ( $p<0.01$ ), occipital to nose diameter ( $p<0.001$ ) and brain sagittal length ( $p<0.05$ ) for EtOH-exposed embryos compared to controls. The greater intra-subject variability observed suggests that binge alcohol exposure levels during pre-implantation can alter the normal developmental programming of early embryos, thus causing abnormal morphological outcomes.

To define how a binge alcohol exposure episode during early pre-implantation can affect fetal development, we next investigated the morphological outcome of E10.5 embryos (control embryos:  $n=108$  from 16 litters, EtOH-exposed:  $n=152$  from 22 litters). As observed in **Fig. 2A**, early pre-implantation EtOH exposure leads to a significant increase in morphological defects or delayed development of mid-gestation embryos (19% vs 2%,  $p<0.0001$ ). Types of defects observed in ethanol-exposed embryos included brain anomalies (e.g., forebrain or midbrain malformations) (10%), growth restriction or delayed development (5%), heart defects (2%), and other abnormal features (2%) (**Fig. 2B**, **Fig. 2C**). There was no sex-specific phenotypic divergence between EtOH-exposed male and female embryos for morphological defects (18% vs 20%, **Fig. S2**) or defect categories (**Fig. S2**). Compared to

controls, we observed that binge alcohol exposure during pre-implantation leads to a larger proportion of E10.5 embryos with phenotypic alterations (29/152 vs 2/108,  $p < 0.0001$ ), and that embryos with phenotypic alterations are distributed across most ethanol-exposed litters (16/22 vs 2/16,  $p < 0.001$ ) (**Fig. 2D**) and not restricted to a small number of litters. Taken together, these results show that a binge alcohol exposure episode on pre-implantation embryos undergoing the epigenetic reprogramming wave does not interfere with normal processes of implantation but leads to heterogeneity in morphological presentation during fetal life that mirrors the spectrum of clinical features associated to FASD.

### ***Pre-implantation alcohol exposure causes alterations in forebrain DNA methylation profiles***

To assess whether alcohol exposure during the embryonic epigenetic reprogramming wave dysregulates the normal programming of brain DNA methylation patterns during fetal development, we established genome-wide DNA methylation profiles using rRRBS on E10.5 mouse forebrains. To mirror the 90% of children with FASD that show no dysmorphic features but still suffer from mild to severe neurological disabilities (e.g., learning deficits, intellectual delays), we randomly selected 6 controls (3 males; 3 females) and 16 ethanol-exposed embryos (8 males; 8 females) of similar size (i.e., embryo size, head height, occipital to nose diameter, brain sagittal length) with no visible morphological defects (**Fig. S1**). By removing embryos with abnormalities or developmental delays, we further reduced potential DNA methylation variability that could be due to divergent forebrain cell type proportions between samples.

The first set of analyses was designed to define whether early pre-implantation alcohol exposure caused lasting DNA methylation alterations in developing E10.5 embryonic forebrains despite the absence of phenotypic presentation. To do so, we compared the average DNA methylation levels in 100 bp non-overlapping genomic windows (*tiles*; see methods section) between controls and ethanol-exposed samples. After removal of sex chromosomes, we identified 114 911 unique sequenced tiles containing 794 803 common CpGs across samples (min. 5 samples/condition,  $\geq 10x$  sequencing depth). When tiles

were classified according to their DNA methylation levels, we observed significant changes in the distribution of categories, including tiles ranging between 90-100% methylation for which we observed a decrease in ethanol-exposed forebrains compared to controls (26% vs 24%,  $p < 0.0001$  (**Fig. 3A**)). Clustering of individual E10.5 forebrain samples by DNA methylation levels for the top 1% most variable tiles ( $n=1200$ ) revealed three main subgroups; a first essentially composed of control samples (6/9; right in heatmap), a second mainly composed of ethanol-exposed female samples with similarities to controls patterns (5/6; middle in heatmap), and a third mostly composed of male ethanol-exposed samples with highly divergent patterns (6/7; left in heatmap) (**Fig. 3B**). We next identified regions of the genome that showed altered DNA methylation levels ( $\pm \geq 10\%$  mean differences between tiles; see methods) as a result of the early pre-implantation alcohol exposure. Using such criteria, we identified 1509 differentially methylations regions (**DMRs**) with significant DNA methylation level decrease ( $n=1440$ ) or increase ( $n=69$ ) in EtOH-exposed forebrains compared to control forebrains (**Fig. 3C**). Differences in methylation levels ranged from 10%-55%, with most DMRs showing 10-15% ( $n=1086$ ; 72%) or 15-20% ( $n=300$ ; 20%) methylation change between EtOH-exposed and control forebrains (**Fig. 3D**). Most DMR-associated tiles with decreased methylation levels in EtOH-exposed samples ( $n=1239$ ) were highly methylated ( $\geq 40-50\%$ ) in control samples, whereas DMRs that gained methylation in EtOH-exposed samples had variable levels in controls (**Fig. 3E**). The DMRs mainly overlapped with intergenic (43%) and genic (53%: introns; 37%, exons; 12%, and promoters; 4%) regions. Gene ontology enrichment analyses associated genic DMRs with various processes, including cell-to-cell signaling pathway, regulation of GTPase activity, positive regulation of nervous system development, tissue and embryonic morphogenesis, as well as regulation of neurological systems (**Fig. 3F**). When we looked at the DNA methylation levels between control and EtOH-exposed forebrains for genes associated to these enriched pathways (e.g., *Lrch1*, *Cflar*, *Celsr1*, *Apoa1*, *Lpin1*, *Epha7*, *Foxa1*, *Egf*, *Il6*, *Nkx6-2*), we observed increased inter-individual variability in methylation levels for EtOH-exposed forebrains with some samples or genomic regions being more affected than others (**Fig. 3G**).



Overall, we showed that alcohol exposure during the embryonic epigenetic reprogramming wave triggers an array of DNA methylation alterations observed in forebrain of embryos that presented no visible abnormalities or developmental delays at E10.5.

### *Sex-specific DNA methylation alterations following pre-implantation alcohol exposure*

We next sought to discern whether early pre-implantation alcohol exposure could have a sex-specific impact on later forebrain DNA methylation patterns. By analyzing male and female samples separately (min. 3 samples/condition/sex,  $\geq 10x$  sequencing depth), we identified 83 424 and 126 857 unique sequenced tiles in male and female forebrains, respectively (**Fig. 4A**). Although there were lesser regions analyzed in males, they showed a larger number of DMRs following pre-implantation alcohol exposure (DMRs: males  $n=2\ 097$ , females  $n=1\ 273$ ) (**Fig. S3**). In male EtOH-exposed forebrains, we found 2097 DMRs of which 1936 (92%) showed decreased methylation. Comparably, female EtOH-exposed forebrains revealed 1273 DMRs of which 1066 (84%) presented decreased methylation (**Fig. S3A-D**). We also observed contrasts between DMR number, as well as associated biological processes among sexes (**Fig. S3E**). However, we do not exclude that these results could be related to only a partial overlap in sequenced regions ( $n=46\ 475$ ) between male and female forebrain samples (**Fig. 4A**).

To circumvent this issue, we focused on the 46 475 regions with sufficient sequencing coverage in both sexes encompassing 373 530 CpGs (**Fig. 4A**). We did not observe any differences in global DNA methylation levels between sexes in either controls or ethanol-exposed forebrains (males: 29.4% vs 28.7%, females: 29.4% vs 29.2%; not shown). However, when these common tiles ( $n=46\ 475$ ) were distributed according to their DNA methylation levels in control and ethanol-exposed forebrains, we observed a greater shift in tile distribution in male EtOH-exposed samples (**Fig. 4B**), suggesting a greater effect on males. Accordingly, among the 46 475 male-female common tiles, we identified 971 male-specific DMRs, 133 female-specific DMRs, and 111 DMRs that were present in both sexes (**Fig 4A**). Out of these 111 common DMRs, 100 had similar alteration profiles (i.e.,  $n=99$  DMRs with decreased

methylation, n=1 DMR with increased methylation) in male and female EtOH-exposed forebrains (**Fig. 4C**). For the other DMRs (n=11), the alcohol exposure caused conflicting alteration profiles between sexes (e.g., decreased-methylation in males vs increased-methylation in females). For the most part, the common DMRs displayed low levels of methylation changes (10-15% range) for both sexes (42% for males, 79% for females), with methylation changes greater than 25% only present in male EtOH-exposed samples (**Fig. 4D**). When compared to the 46 475 common tiles analyzed, the 111 common DMRs were more enriched in intergenic regions and intron categories, as well as for LINE elements, whereas they were mostly depleted of CpG rich sequences (i.e. CpG islands). In addition, common DMRs in male and female EtOH-exposed forebrains showed various levels of DNA methylation for an assortment of genes, including *Tmem267* (putative oncogene), *Vwc2* (neural development and function), *Hcn4* (cardiac function), *Septin9* (cytoskeletal formation), *Gipc2* (gastrointestinal processes) and *Dlx2* (forebrain and craniofacial development) (**Figs. 4F, S4**).

When we turned our attention to male-specific (n=971) and female-specific (n=133) DMRs within the 46 475 common tiles, we observed that pre-implantation alcohol exposure had a more profound impact on male forebrains in terms of DMR number and level of methylation changes (**Figs. 4A, 5A**). Although a portion of observed DMRs showed increased methylation (males 3%; n=31, females 23%; n=30), the majority of sex-specific DMRs were associated with a partial loss of DNA methylation (males n=940, females n=103) in all chromosomes. The only chromosomes that showed an enrichment ( $p < 0.0001$ ) in DMRs were female X-chromosomes (n=48/133). Most of these sex-specific DMRs showed low levels of alterations, in the 10-15% range (males n=627 DMRs; 65%, females n=112 DMRs; 84%), with males having a larger proportion of DMRs with >15% methylation changes (**Fig. 5B**). When we highlighted genomic features associated to these sex-specific DMRs, we observed more female-specific DMRs in promoter regions (17% vs 4%) and CpG rich regions (33% vs 8%) when compared to male-specific DMRs (**Fig. 5C**). When we focused on the distribution of CpG sites in a

sequence context (i.e., CpG islands, shores, shelves), we noticed a significant loss of global methylation in male-specific DMRs for male EtOH-exposed forebrains, and similarly for female-specific in female EtOH-exposed forebrains (**Fig. 5D**). For female-specific DMRs, we noticed that DNA methylation levels in control forebrains are all higher in females compared to males. These higher methylation levels are mainly associated with the presence of methylation marks associated to the X-inactivation process in females (female-specific DMRs on X-chromosome: CpG islands 35/44; shores 9/36, shelves 0/6. **Fig. 5F** bottom for examples). The sex-specific DMRs resulting from pre-implantation alcohol exposure were related to divergent biological processes between males (e.g., muscle differentiation, cell projection organization) and females (e.g., receptor protein tyrosine kinase pathway, epithelial cell migration) (**Figs. 5E, 5F**).

Together, these results indicate that alcohol exposure in pre-implantation embryos in conjunction with epigenetic reprogramming leads to variable levels of sex-specific DNA methylation alterations, with male embryonic forebrains being more prone to alterations. This suggests that pre-implantation male embryos are more susceptible to the initial adverse exposure rendering them less efficient at re-establishing proper DNA methylation patterns during the *de novo* methylation wave, or that female embryonic cells are better at rectifying dysregulated DNA methylation patterns during development.

### ***Pre-implantation alcohol exposure leads to partial loss of imprinted DNA methylation patterns***

To further determine if a binge alcohol exposure episode on early embryos undergoing the epigenetic reprogramming wave is more adverse on the DNA methylation patterns of male or female embryos, we directed our attention to ICRs of imprinted genes, which are well known for their key roles in brain development and growth. We and others have shown that allele-specific methylation maintenance is required on ICRs during the reprogramming wave, as partial or complete loss of ICR profiles is permanent. Since our alcohol exposure specifically targets E2.5 embryos (8-cell stage), dysregulation in ICRs methylation maintenance would still be detectable in E10.5 forebrains. From the

46 475 commonly sequenced tiles, 28 were located within the ICRs of 9 imprinted genes. Our non-allele specific differential methylation analysis revealed that out of these 28 regions, 24 were differentially methylated in male EtOH-exposed forebrains. These 24 DMRs were associated to imprinted genes *H13*, *Nnat*, *Gnas*, *Kcnq1*, *Plagl1*, *Zrsr1*, *Peg13* and *Igf2r* (**Fig. 6A**). In females, only 2 of those 28 tiles showed altered levels in female EtOH-exposed forebrains, which were associated with *Gnas* and *Grb10*. We expanded our search for dysregulated ICR DNA methylation patterns within uniquely sequenced regions in male (n=36 949 tiles) and female (n=80 382 tiles) forebrains (**Fig. 4A**) to retrieve additional ICR-associated tiles. Again, in EtOH-exposed male forebrains, the majority of ICRs (10/13 tiles) showed altered DNA methylation patterns (**Fig. 6B**), which were associated with *Gnas*, *Snrpn*, *Peg3*, *Plagl1*, *Zrsr1* and *Impact*. Conversely, in EtOH-exposed female forebrains, we now observed a large portion of ICRs (19/36 tiles) with dysregulated DNA methylation levels associated to various imprinted genes (i.e., *Gnas*, *Peg10*, *Inpp5f*, *Kcnq1*, *Snrpn*, *Grb10*, *Zrsr1*, *Peg13*, *Slc38a4*, *Igf2r* and *Impact*). When we plotted individual sample DNA methylation values for these ICR-associated DMRs, we again observed a high degree of heterogeneity in EtOH-forebrains with some samples showing altered DNA methylation levels (e.g., partial loss, complete loss), and others revealing normal control methylation values (**Fig. 6A-C**).

Both male and female EtOH-exposed forebrains showed variable levels of DNA methylation alterations in imprinted gene ICRs, which suggests that a binge-like alcohol exposure during pre-implantation interferes with the DNA methylation maintenance machinery during the epigenetic reprogramming wave. Finally, these results also suggest that male pre-implantation embryos are more susceptible to the initial adverse of alcohol exposure.

## DISCUSSION

In this study, we showed that a binge alcohol exposure episode on early-stage embryos (8-cell; E2.5) leads to a surge in morphological brain defects and delayed development during fetal life, that are reminiscent of clinical features associated to FASD. As seen in children exposed to alcohol prenatally, a portion of ethanol-exposed embryos presented a spectrum of alcohol-induced macroscopic defects while the majority showed no noticeable dysmorphic features. However, forebrain tissues from ethanol-exposed embryos with no visible macroscopic abnormalities or developmental delays still presented lasting genome-wide DNA methylation alterations in genes associated to various biological pathways, including neural/brain development, and tissue and embryonic morphogenesis. These ethanol-exposed embryos also showed partial loss of imprinted DNA methylation patterns for various imprinted genes critical for fetal growth, development, and brain function. Moreover, we observed alcohol-induced sex-specific errors in DNA methylation patterns with male-embryos showing increased vulnerability.

### *Modeling early pre-implantation alcohol exposure*

One of the challenges when modeling FASD is unscrambling direct and indirect outcomes associated with the amount, pattern (continuous vs. binge drinking), and developmental timing of alcohol exposure (Chang et al., 2017; Chater-Diehl et al., 2016; Laufer, Chater-Diehl, Kapalanga, & Singh, 2017; Laufer et al., 2015; Liyanage, Zachariah, Davie, & Rastegar, 2015; Lunde et al., 2016; Lussier et al., 2018; Mantha et al., 2014; Petrelli, Weinberg, & Hicks, 2018; Portales-Casamar et al., 2016). By targeting pre-implantation embryo, we observed that a binge-like alcohol exposure on a single embryonic cell type (8-cell stage blastomeres) leads to increased rate of macroscopic defects (e.g., brain anomalies, growth restriction, heart defects) across litters, with no impact on litter size or on sex-specific phenotypic representation during fetal life. These findings corroborate with pioneer work that reported abnormal fetal development without significant reduction in litter size following exposure during pre-implantation (E. L. Abel, 1985; Wiebold & Becker, 1987). However, the acute dosage regimen

paradigms used in those studies resulted in a much higher rate (67% to 100%) of embryonic abnormalities and severe growth retardation, as well as fetal death (Haycock & Ramsay, 2009; Padmanabhan & Hameed, 1988). Nevertheless, such studies along with others (Sandor, Gârban, Checiu, & Daradics, 1981) confirm that even prior to direct maternal-fetal interface exchanges via the placenta, alcohol can reach the developing pre-implantation embryos through the female reproductive track. *In vitro* studies support that pre-implantation embryos are sensitive and negatively affected by alcohol exposure (Pagé-Larivière, Campagna, & Sirard, 2017). It remains to be defined whether some of the milder abnormalities or delays that we observed at mid-gestation would become resolved or accentuated by birth, and whether embryos that presented no visible abnormalities or developmental delays but had DNA methylation alterations would show cognitive dysfunctions as observed in other FASD-models and children with FASD.

### ***Pre-implantation alcohol exposure leads to partial loss of imprinted DNA methylation***

Our genome-wide, high-resolution analysis of ethanol-induced DNA methylation alterations highlighted partial loss of DNA methylation maintenance within various 100bp tiles located across imprinting control regions (e.g., *Gnas*, *Zrsr1*, *Impact*) in E10.5 male and female forebrains. Then again, methylation alterations were not necessarily widespread across entire imprinting control regions, or in all individual ethanol-exposed embryos, suggesting only a slight reduction in DNMT1/DNMT1o maintenance activity. We know that temporary lack of DNA methylation maintenance by DNMT1o in 8-cell embryos (E2.5) leads to delays in development and to a wide range of lethal anatomical abnormalities that are associated with epigenetically mosaic embryos that failed to properly maintain normal imprinted methylation patterns at mid-gestation (Cirio, Martel, et al., 2008; Cirio, Ratnam, et al., 2008; Toppings et al., 2008). In zebrafish, alcohol exposure during the two first days of embryo development led to reduced levels of *Dnmt1* expression (Dasmahapatra & Khan, 2015), which could ultimately lead to a temporary reduction in methylation maintenance activity. Studies aiming at defining

how pre-implantation embryos respond to environmental stimuli (e.g., assisted reproductive technologies, toxicants, ethanol) have broadly explored the impact on imprinted genes, but have mainly relied on evaluating DNA methylation levels of imprinting control regions using targeted approaches (i.e., specific genomic loci) (Haycock & Ramsay, 2009; Kindsfather, Czekalski, Pressimone, Erisman, & Mann, 2019; Market-Velker, Zhang, Magri, Bonvissuto, & Mann, 2010). Although informative, conclusions are often based on profiling DNA methylation levels of a limited number of CpG sites associated to a handful of genes. For instance, modeling binge alcohol exposure during two consecutive days (E1.5, E2.5) led to decreased fetal and placental weight by E10.5, but only to a partial loss of DNA methylation in the *H19* —a negative regulator of growth and proliferation— imprinting control region (only 17 CpG analysed) in the placenta. Although only a portion of one ICR was evaluated, these results insinuated that embryonic imprinted methylation was not affected by such early pre-implantation alcohol exposure.

Since imprinted genes are well recognized in regulating essential neurodevelopmental processes, including neural differentiation, migration and cell survival (Ho-Shing & Dulac, 2019), we can presume that the forebrain of ethanol-exposed embryos with severe macroscopic defects and developmental delays would have broader loss of imprinted DNA methylation patterns compared to those with no visible abnormalities. However, the fact that morphologically normal forebrain tissues derived from ethanol-exposed pre-implantation embryos reveal widespread low-level DNA methylation alterations with increased inter-individual variability in imprinted control regions supports that failure in maintaining accurate methylation imprints could contribute to the invisible nature of FASD.

### ***Pre-implantation alcohol exposure initiates sex-specific DNA methylation programming errors***

We demonstrated that exposing 8-cell embryos to alcohol is detrimental for future forebrain autosomal and X-chromosome DNA methylation patterns. Furthermore, such an early embryonic exposure leads to sex-specific DNA methylation alterations with male embryos being more susceptible

to alterations. Early embryonic developmental stages are marked by a series of molecular events that are crucial for the proper establishment of the developmental program, as well as the *de novo* genome-wide DNA methylation signatures that are conserved throughout development (Messerschmidt et al., 2014; Seisenberger et al., 2013). A considerable amount of evidence shows that interfering with this process *in vivo* or *in vitro* leads to sex-specific long-term effects in the offspring (Chang, Wang, Bedi, & Golding, 2019; de Ávila et al., 2020; Donjacour et al., 2014; Hart & Norman, 2013; Källén et al., 2010; Kenton, Castillo, Kehrer, & Brigman, 2020; Skuse, 2000; K. Tan, Wang, Zhang, An, & Tian, 2016; Whidden et al., 2016). Although the mechanism remains unclear, we know that molecular events in early-stage embryos are marked with sex-specific discrepancies. For instance, mammalian pre-implantation embryos display differential expression of sex chromosome and autosomal transcripts, leading to extensive transcriptional sexual dimorphism (Bermejo-Alvarez, Rizos, Rath, Lonergan, & Gutierrez-Adan, 2008; Petropoulos et al., 2016). In mouse, sex-biased gene expression (n=69; mainly X-linked) is detected as early as the 8-cell stage with substantial variation between individual embryos, and with female embryos expressing higher transcript levels. Then, just prior to the *de novo* re-methylation wave, the sex chromosomes seem to further drive this sexual dimorphism in transcriptional regulation for hundreds of autosomal genes, with *Dnmt3a* and *Dnmt3b* showing higher expression in male blastocyst (Bermejo-Alvarez, Rizos, Rath, Lonergan, & Gutierrez-Adan, 2010). This is consistent with sex-specific acquisition of DNA methylation reported in bovine blastocyst, with males showing increased levels (Bermejo-Alvarez et al., 2008; Gebert et al., 2009). Thus, the alcohol-induced sex-specific DNA methylation alterations resulting from an early embryonic alcohol exposure model are mostly initiated at the 8-cell stage because of the male-female differences in transcriptional regulation. The DNA methylation alterations would then trigger a series of events that would negatively impact the re-establishment of genome-wide *de novo* DNA methylation profiles occurring between E3.5 and E6.5 in a sex-specific manner, with males being more affected. Once established, these abnormal *de novo* DNA methylation profiles would be maintained or would initiate further DNA methylation alterations during



subsequent developmental stages. Since the sex-specific alterations observed in the forebrains are linked to divergent biological pathways, this could lead to sex-specific neurocognitive impairments in offspring. Although such observations have been made in children with FASD, with males appearing to be more vulnerable to the irreversible effects of fetal alcohol exposure (e.g., cranial and facial malformations, learning disabilities, social and memory disabilities, and altered brain structure and function) (reviewed in (Terasaki, Gomez, & Schwarz, 2016)), further studies are needed to explore the long-term degree and impact of the sexual dimorphism in this pre-implantation alcohol exposure paradigm.

### ***Pre-implantation alcohol exposure and impact on neurodevelopment***

One common phenotype observed in human FASD and animal models of prenatal alcohol exposure is the interference of alcohol on the development of the central nervous system (structural or functional abnormalities). We observed DNA methylation alterations in promoters and bodies of genes implicated in brain and nervous system function and development (e.g., *Dlx2*, *Epha7*, *Foxa1*, *Nkx6*, *Vwc2*). For example, *Dlx2* (Distal-Less Homeobox 2), is part of a transcription factor family (*Dlx1/2*; *Dlx3/4*; *Dlx5/6*) that is critical molecular determinants for forebrain and craniofacial development, as well as for coordinating the timing of GABA(gamma-aminobutyric acid)ergic interneuron migration and process formation (Anderson, Eisenstat, Shi, & Rubenstein, 1997; Cobos, Borello, & Rubenstein, 2007; Hernández-Miranda, Parnavelas, & Chiara, 2010; Yun et al., 2002). *Dlx1/2* are required to promote the expression of several downstream factors including other *Dlx* genes and *Arx* (Colasante et al., 2008), an X-linked gene that also controls cortical interneuron migration and differentiation (Friocourt & Parnavelas, 2011), which incidentally showed altered DNA methylation in female ethanol-exposed forebrains. Mice lacking *Dlx1/2* have profound deficits in tangential migration of GABAergic cortical interneurons and neurite growth. Similarly, prenatal stress-induced anxiety in mouse leads to GABAergic interneuron deficiency-associated dysregulation of promoter DNA methylation levels of *Gad67* (glutamic acid decarboxylase 67), an enzyme critical for GABA synthesis

(the principal inhibitory neurotransmitter). In prenatal alcohol exposure models targeting different brain developmental time points, the migration and positioning of GABAergic cortical interneurons are profoundly impaired, leading to subsequent cortical dysfunction (Bird, Taylor, Pinkowski, Chavez, & Valenzuela, 2018; Cunningham et al., 2017; Cuzon, Yeh, Yanagawa, Obata, & Yeh, 2008; Larsen et al., 2016; Skorput, Lee, Yeh, & Yeh, 2019). We know that cortical interneuron dysfunction, associated with impaired development, migration, or function of interneurons, results in interneuronopathies that contribute to multiple neurodevelopmental disorders including autism, epilepsy, schizophrenia, and FASD (Paterno, Casalia, & Baraban, 2020; Rossignol, 2011; Skorput, Gupta, Yeh, & Yeh, 2015). We also know that GABAergic interneurons are particularly responsive to adverse maternal exposures during *in utero* periods of developmental plasticity; from the moment these cells arise, to the shaping of cortical circuits (Cuzon et al., 2008; Skorput et al., 2015). Our data suggest that early embryonic alcohol exposure triggers alterations in the epigenome that leave lasting signals that could lead to pathological plasticity in the developing brain. We need to further define whether GABAergic interneurons, or other cortical neurons, are particularly vulnerable to early embryonic alcohol-induced epigenetic programming errors, and whether this could drive interneuronopathies or neurodevelopmental impairments associated with FASD.

## CONCLUSION

We showed that pre-implantation alcohol exposure is detrimental for normal development and leads to a broad spectrum of adverse outcomes that closely replicate clinical facets observed in children with FASD. Specifically, we demonstrated that a binge-like drinking episode while pre-implantation embryos are in the midst of their reprogramming wave leads to two main categories of lasting programming errors: the partial loss of DNA methylation at several imprinted control regions, and the abnormal re-establishment of *de novo* DNA methylation profiles in key biological pathways (e.g., neural/brain

development, tissue and embryonic morphogenesis). Further studies in peri-implantation embryos, when DNA methylation is globally reacquired, and in specific cell subtypes during key neocortex developmental time points will provide a better understanding of the fundamental mechanisms leading to these DNA methylation programming errors and their implication in neurodevelopmental FASD-related deficits. Importantly, our data demonstrate that pre-implantation alcohol exposure does not lead to an “all-or-nothing” response, as morphologically normal embryos still presented conserved and sex-specific DNA methylation alterations in forebrain tissues, which could be indicative of the particular sexual dimorphism in cognitive dysfunctions associated with FASD. Thus, our study provides strong scientific evidence to refute the “all-or-nothing” principle and supports the contribution of early embryonic epigenetic alterations to the manifestation of neurodevelopmental phenotypes observed in a portion of children with FASD.

## **METHODS**

### **Pre-implantation embryo binge-like ethanol exposure model**

Animal work was approved by the Comité Institutionnel de Bonnes Pratiques Animales en Recherche (CIBPAR) of the CHU Ste-Justine Research Center under the guidance of the Canadian Council on Animal Care (CCAC). Female C57BL/6 mice (8-week-old) were mated with same age C57BL/6 males (Charles River laboratories). Females that showed copulatory plugs the next morning were considered pregnant with day 0.5 embryos (E0.5). They were separated from the males and housed together in a 12h light/dark cycle with unlimited access to food and water.

Using a recognized prenatal binge-like alcohol exposure paradigm (Haycock & Ramsay, 2009; Kleiber, Mantha, Stringer, & Singh, 2013; Mantha et al., 2014; Padmanabhan & Hameed, 1988), pregnant females (E2.5) were injected with 2 subsequent doses of 2.5g/kg ethanol 50% (ethanol-exposed

group) or an equivalent volume of saline (control group) at 2 hours intervals. Female with the same treatment were housed together and had negligible handling during the gestation.

### **Blood alcohol concentration quantification**

Blood alcohol concentration associated with our pre-implantation binge-like alcohol exposure paradigm was quantified over a 4h period. To avoid supplementary stress on experimental animals, a different subset of pregnant E2.5 females (n=12) was used for this experiment. Ethanol-exposed females (n=3) were euthanized at each time point (1, 2, 3 and 4h), blood was collected, samples were centrifuged to separate serum and plasma, and alcohol was quantified using the EnzyChrome Ethanol Assay kit (BioAssays Systems/Cedarlane) following manufacturer's recommendations (1:5 plasma dilution).

### **Morphological analysis**

At E10.5, pregnant females were euthanized, and embryos were collected and dissected for morphological evaluation using Leica stereo microscope. Using LasX software, measurements of the crown-rump length (top of the head to the end of the tail), occipital to nose length (occipital part of the head to the nasal process), height of the head (top of the head to the beginning of the torso) and length of the midbrain (occipital part to the midbrain/forebrain limit) were done. Similarly, morphological defects (e.g., severe developmental delay or growth restriction, brain or head malformation, heart anomaly or any other unexpected feature) were evaluated (Christensen et al., 2013; Christensen et al., 2016; Theiler, 2013). Three embryos (n=3) revealed more than 2 morphological defects and were placed in the category of their main defect (delayed n=2, brain malformation n=1). Embryos that hatched (Ctrl n= 23; EtOH n=21) from the yolk sac during dissection were excluded of both measurements and morphological analyses due to the possible deformation induced by the pressure on the embryo during the expulsion. The sex of each embryo was determined by qPCR using expression of *Ddx3*, on yolk sac

DNA. Statistical analyses were done using GraphPad prism (version 8.4.3) for t-test with Welch correction and f-test for variance or R (version 3.5.0) for chi-square and proportional z-test.

### **DNA extraction and Reduced Representation Bisulfite Sequencing**

Following morphological analyses, embryonic E10.5 forebrains were isolated, flash frozen and kept at -80°C. Genomic DNA was extracted from forebrains using the QIAamp DNA Micro kit (Qiagen #56304) following manufacturer's recommendations. Extracted DNA was quantified using QuBit fluorimeter apparel with the Broad range DNA assay kit (ThermoFisher #Q32853). The sex of each DNA sample was again validated by *Ddx3* qPCR. DNA samples from forebrains with no apparent morphological defects were randomly selected, using 6 control embryos (3 males and 3 females, from 3 different litters) and 16 ethanol-exposed embryos (8 males and 8 females, from 6 different litters). EtOH-exposed and control embryo groups were similar in size and morphology (**Fig. S1**). Genomic DNA was used to produce rapid Reduced Representation Bisulfite Sequencing (rRRBS) libraries as previously described (L.-M. Legault, Chan, & McGraw, 2019; L. M. Legault et al., 2020; S. McGraw et al., 2015; Piché et al., 2019; Pierre, Legault, Londono, McGraw, & Lodygensky, 2020). Briefly, 500ng of DNA was digested with *MspI* restriction enzyme, adapters were attached to DNA fragments followed by sodium bisulfite conversion and amplification/indexation of libraries. Libraries were quantified using QuBit fluorimeter apparel with the High Sensitivity DNA assay kit (ThermoFisher #Q32854). Quality control was assessed using BioAnalyzer and paired-end sequencing was done on Illumina HiSeq 2500 at the Genome Québec core facility.

### **Bioinformatics analysis**

Data processing, alignment (mm10 genome) and methylation calls were performed using our established pipeline (L. M. Legault et al., 2020; S. McGraw et al., 2015; Piché et al., 2019; Pierre et al., 2020) which includes tools such as Trim Galore (version 0.3.3) (Krueger, 2012), BSMAP (version 2.90)

(Xi & Li, 2009) and R (version 3.5.0). Differentially methylated regions were obtained with MethylKit (version 1.8.1) (Akalın et al., 2012) using the Benjamini-Hochberg false discovery rate (FDR) procedure. Fixed parameters were used, including 100bp stepwise tiling windows, a minimum of 2 CpGs per tile and a threshold of  $q < 0.01$ . DNA methylation level is calculated as the average methylation of all CpGs within a tile for all the samples within a condition (**Fig. 3**: minimum 5 samples/condition,  $\geq 10x$  sequencing depth; **Fig. 4-6 & Fig. S3-S4**: minimum 3 samples/condition/sex,  $\geq 10x$  sequencing depth). The number of CpGs per tile and bisulfite conversion rate ( $>97\%$ ) were obtained using a custom Perl script.

Annotation of the analysed tiles was done using Homer (version 4.10.1) with mm10 reference genome. Gene ontology enrichment analysis was performed with Metascape (Zhou et al., 2019) online tool using only differentially methylated tiles located in genic regions. Repeats and CpG islands coordinates were obtained from UCSC table browser databases (mm10 genome). CpG context tracks (CpG shores and CpG shelves) were built by adding up respectively 0-2kb and 2-4kb from the CpG islands coordinates as previously describes (Bibikova et al., 2011; L. M. Legault et al., 2020).

## FIGURE LEGENDS

**Figure 1. Early pre-implantation alcohol exposure affects mouse embryonic development at mid-gestation.** **A)** Schematic description of binge alcohol exposure model during pre-implantation embryo development, and analyses performed at mid-gestation. Pregnant females were exposed to EtOH (2x 2.5g/kg EtOH) or Saline (Ctrl) (equivalent volume to ethanol) by subcutaneous injections (2h interval) to precisely target E2.5 stage embryos (~8-cell stage). E10.5 embryos were collected for morphological assessment; forebrain was isolated for genome-wide DNA methylation analyses. **B)** Quantification of blood alcohol concentration in pregnant females following EtOH exposure at E2.5. Red stars indicate the two EtOH injection time points. Peak level (284mg/dL) was observed at 3h post-exposure, with an average of 158.31 mg/dL over 4hrs. **C)** Number of E10.5 embryos per litter in Ctrl (n=16 litters; average 8.13 embryos/litter) and EtOH-exposed (n=22 litters; average 7.91 embryos/litter). **D)** Male and female embryo sex ratios of litters presented in panel C), with number of embryos shown in bar graph. **E)** Embryonic (E10.5) measurements: crown-rump length, head height, occipital-nose length and brain sagittal length. Control embryos: (n=63, 8 litters), ethanol-exposed embryos (n=76, 11 litters). No significant difference of the means; t-test with Welch's correction, but higher variance in EtOH-exposed; F-test.

**Figure 2. Increased phenotypic alterations in developing embryos following early pre-implantation alcohol exposure.** **A)** Percentage of E10.5 embryos with phenotypic alterations (Ctrl: 2%; n=2/108, EtOH-exposed: 19%; n=29/152, \*\*\*\*p<0.0001; chi-square test). **B)** Classification and proportion of phenotypic alterations observed in EtOH-exposed embryos. **C)** Examples of primary phenotypic alterations observed in EtOH-exposed embryos. Views from both side of the embryo and zoom on the head for control (i, vi, xi) and EtOH-exposed embryos with severe developmental delays (ii, vii, xii), brain malformations (iii, viii, xiii, iv, ix, xiv) and no apparent defects (v, x, xv). **D)** Number of embryos with alterations and number of litters with at least one affected embryo. \*\*\*p<0.001; chi-square test.

**Figure 3. Early pre-implantation alcohol exposure triggers DNA methylation alterations in developing embryonic forebrain.** Genome-wide CpG methylation analyses of E10.5 control (n=6) and ethanol-exposed (n=16) forebrains. **A)** Distribution of genomic tiles (100bp) (all-tiles; n=114 911) across ranges of CpG methylation levels in control and EtOH-exposed samples. \*\*\*\*p<0.0001, \*\*\*p<0.001, \*p<0.05; z-test proportion test. **B)** Heatmap showing CpG methylation levels for the top1% most variable tiles (n=1 200) between control and EtOH-exposed forebrains. Gray lines in heatmap have no associated methylation values because of lack of sufficient sequencing coverage in sample. **C)** Scatterplot representing the differentially methylated regions (DMRs) between control and EtOH-exposed forebrains (see methods section for details). Red dots represent the tiles with a methylation increase of at least 10% in EtOH-exposed compared to control forebrains (n=69); blue dots represent the tiles with a methylation decrease of at least 10% in EtOH-exposed compared to control forebrains (n=1 440); grey dots represent the tiles with changes less than 10% in EtOH-exposed compared to control forebrains (n=113 402). **D)** Proportion of DMRs associated with the changes of CpG methylation levels between control and EtOH-exposed E10.5 forebrains. **E)** Comparison of CpG methylation levels of specific DMRs-associated tiles in EtOH-exposed versus control forebrains. Blue bar graph represents the comparison for decreased-methylation DMRs (n=1 440); red bar graph represents comparison for the

increased-methylation DMRs (n=69). **F**) Functional enrichment analysis showing top 10 enriched pathways for decreased- and increased-methylation DMRs located in genic regions (n=710 unique gene DMRs), based on Metascape analysis for pathways and p-value. The size of the dot represents the number of DMR-associated genes in a pathway, and gene ratio represents the number of DMR-associated genes with regards to the number of genes in a pathway. **G**) Examples of CpG methylation levels of individual samples for DMR-associated genes related to the top enriched pathways. Letters under gene name relate to the pathways in **F**). † represents significant differences in CpG methylation levels of DMRs (e.g.,  $\pm > 10\%$  methylation difference,  $q < 0.01$ ) between control and EtOH-exposed embryos (see methods section for details).

**Figure 4. Sex-related changes in embryonic forebrain DNA methylation mediated by early pre-implantation ethanol exposure.** **A**) Schematic design of sex-related genome-wide CpG methylation analysis in male (Ctrl n=3, EtOH n=8) and female (Ctrl n=3, EtOH n=8) E10.5 forebrain samples. Identification of all-tiles associated with either male samples (n=83 424), female samples (n=126 857), male-female common samples (n=46 475), as well as male-specific (n=971), female-specific (n=133) and common (n=144) DMRs (see methods section for details). **B**) Distribution of genomic tiles (100bp) (common tiles; n=46 475) across ranges (10%) of CpG methylation in male and female control and EtOH-exposed samples. \*\*\*\* $p < 0.0001$ , \*\* $p < 0.01$ , \* $p < 0.05$ ; z-test proportion test. **C**) Distribution of common DMRs (n=111) with increased or decreased CpG methylation in male (outer circle) and female (inner circle) samples. **D**) Proportion of common DMRs associated with the changes of CpG methylation levels between control and EtOH-exposed in male and female forebrains. **E**) Percentage of tiles associated with various genomic features: genomic annotation (left), repeat elements (middle) and CpG-rich context (right) in common all-tiles (n=46 475) and common DMRs (n=111). **F**) Examples of CpG methylation levels of individual samples of common DMRs in male and female samples. † represents significant differences in CpG methylation levels of DMRs (e.g.,  $\pm > 10\%$  methylation difference,  $q < 0.01$ ) between control and EtOH-exposed embryos (see methods section for details).

**Figure 5. Early pre-implantation ethanol exposure induces sex-specific DNA methylation alterations in developing embryonic forebrain.** Identification of male and female sex-specific DMRs in ethanol-exposed E10.5 forebrains is described in Fig.4A. **A**) Manhattan plot showing differences of CpG methylation by chromosomal position for male-specific (n=971; left graph) and female-specific (n=133; right graph) DMRs. Red dots represent DMRs with increased-methylation in EtOH-exposed forebrains (n=31; right graph and n=30; left graph); blue dots represent DMRs with decreased methylation in EtOH-exposed forebrains (n=940; right graph and n=103; left graph); grey dots represent tiles with less than 10% methylation differences between EtOH-exposed and control forebrains (n=45 504; right graph and n=46 342; left graph). **B**) Proportion of sex-specific DMRs (upper graph; male n=971, lower graph; female n=133) associated with changes in CpG methylation levels between control and EtOH-exposed E10.5 forebrains. **C**) Percentage of sex-specific DMR-associated tiles (male n=971, female n=133) across various genomic features: genomic annotation (top), repeat elements (middle) and CpG-rich context (bottom). **D**) Percentage of CpG methylation levels of male- and female-specific DMRs based on the distribution of CpG sites in CpG islands, CpG shores and CpG shelves. **E**) Functional enrichment analysis showing top enriched pathways for male- (top 10 pathways, n=508 unique gene DMRs) and female-specific DMRs (n=87 unique gene DMRs),



based on Metascape analysis for pathways and p-value. The size of the dot represents the number of DMR-associated genes in pathways, and gene ratio represents the number of DMR-associated genes with regards to the number of genes in a pathway. **F)** Examples of CpG methylation levels of individual samples for sex-specific DMR-associated genes related to the top enriched pathways in **E)**. Letters under gene name relate to the pathways in **E)**. † represents significant differences in CpG methylation levels of DMRs (e.g.,  $\pm > 10\%$  methylation difference,  $q < 0.01$ ) between control and EtOH-exposed embryos (see methods section for details).

**Figure 6. Early pre-implantation ethanol exposure leads to partial loss of DNA methylation maintenance across imprinting control regions. A-C)** Heatmaps representing CpG methylation levels for control versus EtOH-exposed samples in regions (100bp tiles) located within defined imprinting control regions. Examples of CpG methylation levels of individual samples in imprinting control regions associated tiles are shown. † represents significant differences in CpG methylation levels of DMRs (e.g.,  $\pm > 10\%$  methylation difference,  $q < 0.01$ ) between control and EtOH-exposed embryos (see methods section for details). **A)** Imprinting control regions (n=28 tiles) analyzed (sufficient sequencing coverage) in both male and female samples (control vs EtOH-exposed). **B)** Imprinting control regions (n=13 tiles) analyzed only in males (lack of proper sequencing coverage in females). **C)** Imprinting control regions (n=36 tiles) analyzed only in females (lack of proper sequencing coverage in males).

## ACKNOWLEDGMENTS & FUNDING

This work was supported by a research grant to SM from the Sickkids Foundation and Fonds de Recherche du Québec en Santé (FRQS). LML is supported by Canadian Institutes of Health Research (CIHR) scholarship. MBL and KD are supported by FRQS scholarship / fellowship. ALA is supported by Université de Montréal and Réseau Québécois en Reproduction (RQR) scholarships. AL is supported by Université de Montréal and Centre de Recherche en Reproduction et Fertilité (CRRF) scholarships. SM is supported by FRQS – Junior 2 salary award. We thank the McGraw lab for critical comments and suggestions, as well as Elizabeth Maurice-Elder for editing.

## COMPETING INTERESTS

No competing interests declared.

## DATA AVAILABILITY

The data from this study have been submitted to the Gene Expression Omnibus ([GSE162765](#)).

## REFERENCES

- Abel, E. (1978). Effects of ethanol on pregnant rats and their offspring. *Psychopharmacology*, *57*(1), 5-11.
- Abel, E. L. (1985). Prenatal effects of alcohol on growth: a brief overview. *Fed Proc*, *44*(7), 2318-2322.
- Akalin, A., Kormaksson, M., Li, S., Garrett-Bakelman, F. E., Figueroa, M. E., Melnick, A., & Mason, C. E. (2012). methylKit: a comprehensive R package for the analysis of genome-wide DNA methylation profiles. *Genome Biol*, *13*(10), R87. doi:10.1186/gb-2012-13-10-r87
- Anderson, S. A., Eisenstat, D. D., Shi, L., & Rubenstein, J. L. (1997). Interneuron migration from basal forebrain to neocortex: dependence on *Dlx* genes. *Science*, *278*(5337), 474-476. doi:10.1126/science.278.5337.474
- Bermejo-Alvarez, P., Rizos, D., Lonergan, P., & Gutierrez-Adan, A. (2011). Transcriptional sexual dimorphism during preimplantation embryo development and its consequences for developmental competence and adult health and disease. *Reproduction*, *141*(5), 563-570. doi:10.1530/rep-10-0482
- Bermejo-Alvarez, P., Rizos, D., Rath, D., Lonergan, P., & Gutierrez-Adan, A. (2008). Epigenetic differences between male and female bovine blastocysts produced in vitro. *Physiol Genomics*, *32*(2), 264-272. doi:10.1152/physiolgenomics.00234.2007
- Bermejo-Alvarez, P., Rizos, D., Rath, D., Lonergan, P., & Gutierrez-Adan, A. (2010). Sex determines the expression level of one third of the actively expressed genes in bovine blastocysts. *Proc Natl Acad Sci U S A*, *107*(8), 3394-3399. doi:10.1073/pnas.0913843107
- Bibikova, M., Barnes, B., Tsan, C., Ho, V., Klotzle, B., Le, J. M., . . . Shen, R. (2011). High density DNA methylation array with single CpG site resolution. *Genomics*, *98*(4), 288-295. doi:10.1016/j.ygeno.2011.07.007
- Bird, C. W., Taylor, D. H., Pinkowski, N. J., Chavez, G. J., & Valenzuela, C. F. (2018). Long-term Reductions in the Population of GABAergic Interneurons in the Mouse Hippocampus following Developmental Ethanol Exposure. *Neuroscience*, *383*, 60-73. doi:10.1016/j.neuroscience.2018.05.003
- Boschen, K. E., Criss, K. J., Palamarchouk, V., Roth, T. L., & Klintsova, A. Y. (2015). Effects of developmental alcohol exposure vs. intubation stress on BDNF and TrkB expression in the hippocampus and frontal cortex of neonatal rats. *Int J Dev Neurosci*, *43*, 16-24. doi:10.1016/j.ijdevneu.2015.03.008
- Breton-Larrivée, M., Elder, E., & McGraw, S. (2019). DNA methylation, environmental exposures and early embryo development. *Anim Reprod*, *16*(3), 465-474. doi:10.21451/1984-3143-ar2019-0062
- Chang, R. C., Skiles, W. M., Chronister, S. S., Wang, H., Sutton, G. I., Bedi, Y. S., . . . Golding, M. C. (2017). DNA methylation-independent growth restriction and altered developmental programming in a mouse model of preconception male alcohol exposure. *Epigenetics*, *12*(10), 841-853. doi:10.1080/15592294.2017.1363952
- Chang, R. C., Wang, H., Bedi, Y., & Golding, M. C. (2019). Preconception paternal alcohol exposure exerts sex-specific effects on offspring growth and long-term metabolic programming. *Epigenetics Chromatin*, *12*(1), 9. doi:10.1186/s13072-019-0254-0
- Chater-Diehl, E. J., Laufer, B. I., Castellani, C. A., Alberry, B. L., & Singh, S. M. (2016). Alteration of Gene Expression, DNA Methylation, and Histone Methylation in Free Radical Scavenging Networks in Adult Mouse Hippocampus following Fetal Alcohol Exposure. *PLoS One*, *11*(5), e0154836. doi:10.1371/journal.pone.0154836
- Christensen, K. E., Deng, L., Leung, K. Y., Arning, E., Bottiglieri, T., Malysheva, O. V., . . . Rozen, R. (2013). A novel mouse model for genetic variation in 10-formyltetrahydrofolate synthetase exhibits disturbed purine synthesis with impacts on pregnancy and embryonic development. *Hum Mol Genet*, *22*(18), 3705-3719. doi:10.1093/hmg/ddt223
- Christensen, K. E., Hou, W., Bahous, R. H., Deng, L., Malysheva, O. V., Arning, E., . . . Rozen, R. (2016). Moderate folic acid supplementation and MTHFD1-synthetase deficiency in mice, a model for the R653Q variant, result in embryonic defects and abnormal placental development. *Am J Clin Nutr*, *104*(5), 1459-1469. doi:10.3945/ajcn.116.139519

- Cirio, M. C., Martel, J., Mann, M., Toppings, M., Bartolomei, M., Trasler, J., & Chaillet, J. R. (2008). DNA methyltransferase 1o functions during preimplantation development to preclude a profound level of epigenetic variation. *Dev Biol*, 324(1), 139-150. doi:10.1016/j.ydbio.2008.09.015
- Cirio, M. C., Ratnam, S., Ding, F., Reinhart, B., Navara, C., & Chaillet, J. R. (2008). Preimplantation expression of the somatic form of Dnmt1 suggests a role in the inheritance of genomic imprints. *BMC Dev Biol*, 8, 9. doi:10.1186/1471-213x-8-9
- Cobos, I., Borello, U., & Rubenstein, J. L. (2007). Dlx transcription factors promote migration through repression of axon and dendrite growth. *Neuron*, 54(6), 873-888. doi:10.1016/j.neuron.2007.05.024
- Colasante, G., Collombat, P., Raimondi, V., Bonanomi, D., Ferrai, C., Maira, M., . . . Broccoli, V. (2008). Arx is a direct target of Dlx2 and thereby contributes to the tangential migration of GABAergic interneurons. *J Neurosci*, 28(42), 10674-10686. doi:10.1523/jneurosci.1283-08.2008
- Cook, J. L., Green, C. R., Lilley, C. M., Anderson, S. M., Baldwin, M. E., Chudley, A. E., . . . Rosales, T. (2016). Fetal alcohol spectrum disorder: a guideline for diagnosis across the lifespan. *Cmaj*, 188(3), 191-197. doi:10.1503/cmaj.141593
- Cunningham, L. A., Newville, J., Li, L., Tapia, P., Allan, A. M., & Valenzuela, C. F. (2017). Prenatal Alcohol Exposure Leads to Enhanced Serine 9 Phosphorylation of Glycogen Synthase Kinase-3 $\beta$  (GSK-3 $\beta$ ) in the Hippocampal Dentate Gyrus of Adult Mouse. *Alcohol Clin Exp Res*, 41(11), 1907-1916. doi:10.1111/acer.13489
- Cuzon, V. C., Yeh, P. W., Yanagawa, Y., Obata, K., & Yeh, H. H. (2008). Ethanol consumption during early pregnancy alters the disposition of tangentially migrating GABAergic interneurons in the fetal cortex. *J Neurosci*, 28(8), 1854-1864. doi:10.1523/jneurosci.5110-07.2008
- Dasmahapatra, A. K., & Khan, I. A. (2015). DNA methyltransferase expressions in Japanese rice fish (*Oryzias latipes*) embryogenesis is developmentally regulated and modulated by ethanol and 5-azacytidine. *Comp Biochem Physiol C Toxicol Pharmacol*, 176-177, 1-9. doi:10.1016/j.cbpc.2015.07.002
- de Ávila, M. A. P., Gonçalves, R. M., Nascimento, E. C. C., Cabral, L. D. M., Vilela, F. C., & Giusti-Paiva, A. (2020). Prenatal exposure to alcohol impairs social play behavior in adolescent male mice. *Neurotoxicology*, 79, 142-149. doi:10.1016/j.neuro.2020.05.007
- Donjacour, A., Liu, X., Lin, W., Simbulan, R., & Rinaudo, P. F. (2014). In vitro fertilization affects growth and glucose metabolism in a sex-specific manner in an outbred mouse model. *Biol Reprod*, 90(4), 80. doi:10.1095/biolreprod.113.113134
- Dwyer-Lindgren, L., Flaxman, A. D., Ng, M., Hansen, G. M., Murray, C. J., & Mokdad, A. H. (2015). Drinking Patterns in US Counties From 2002 to 2012. *Am J Public Health*, 105(6), 1120-1127. doi:10.2105/ajph.2014.302313
- El Shawa, H., Abbott, C. W., 3rd, & Huffman, K. J. (2013). Prenatal ethanol exposure disrupts intraneocortical circuitry, cortical gene expression, and behavior in a mouse model of FASD. *J Neurosci*, 33(48), 18893-18905. doi:10.1523/jneurosci.3721-13.2013
- Farthing, C. R., Ficz, G., Ng, R. K., Chan, C. F., Andrews, S., Dean, W., . . . Reik, W. (2008). Global mapping of DNA methylation in mouse promoters reveals epigenetic reprogramming of pluripotency genes. *PLoS Genet*, 4(6), e1000116. doi:10.1371/journal.pgen.1000116
- Friocourt, G., & Parnavelas, J. G. (2011). Identification of Arx targets unveils new candidates for controlling cortical interneuron migration and differentiation. *Front Cell Neurosci*, 5, 28. doi:10.3389/fncel.2011.00028
- Garro, A. J., McBeth, D. L., Lima, V., & Lieber, C. S. (1991). Ethanol consumption inhibits fetal DNA methylation in mice: implications for the fetal alcohol syndrome. *Alcohol Clin Exp Res*, 15(3), 395-398. doi:10.1111/j.1530-0277.1991.tb00536.x
- Gebert, C., Wrenzycki, C., Herrmann, D., Gröger, D., Thiel, J., Reinhardt, R., . . . Niemann, H. (2009). DNA methylation in the IGF2 intragenic DMR is re-established in a sex-specific manner in bovine blastocysts after somatic cloning. *Genomics*, 94(1), 63-69. doi:10.1016/j.ygeno.2009.03.004
- Ghimire, S. R., Dhungel, S., Rai, D., Jha, C. B., Saxena, A. K., & Maskey, D. (2008). Effect of prenatal exposure of alcohol in the morphology of developing rat embryo. *Nepal Med Coll J*, 10(1), 38-40.

- Grucza, R. A., Norberg, K., Bucholz, K. K., & Bierut, L. J. (2008). Correspondence between secular changes in alcohol dependence and age of drinking onset among women in the United States. *Alcohol Clin Exp Res*, 32(8), 1493-1501. doi:10.1111/j.1530-0277.2008.00719.x
- Hart, R., & Norman, R. J. (2013). The longer-term health outcomes for children born as a result of IVF treatment: Part I--General health outcomes. *Hum Reprod Update*, 19(3), 232-243. doi:10.1093/humupd/dms062
- Haycock, P. C., & Ramsay, M. (2009). Exposure of mouse embryos to ethanol during preimplantation development: effect on DNA methylation in the h19 imprinting control region. *Biol Reprod*, 81(4), 618-627. doi:10.1095/biolreprod.108.074682
- Hernández-Miranda, L. R., Parnavelas, J. G., & Chiara, F. (2010). Molecules and mechanisms involved in the generation and migration of cortical interneurons. *ASN Neuro*, 2(2), e00031. doi:10.1042/an20090053
- Ho-Shing, O., & Dulac, C. (2019). Influences of genomic imprinting on brain function and behavior. *Current opinion in behavioral sciences*, 25, 66-76.
- Källén, B., Finnström, O., Lindam, A., Nilsson, E., Nygren, K. G., & Olausson, P. O. (2010). Cancer risk in children and young adults conceived by in vitro fertilization. *Pediatrics*, 126(2), 270-276. doi:10.1542/peds.2009-3225
- Kazakevych, J., Sayols, S., Messner, B., Krienke, C., & Soshnikova, N. (2017). Dynamic changes in chromatin states during specification and differentiation of adult intestinal stem cells. *Nucleic Acids Res*, 45(10), 5770-5784. doi:10.1093/nar/gkx167
- Kenton, J. A., Castillo, V. K., Kehrer, P. E., & Brigman, J. L. (2020). Moderate Prenatal Alcohol Exposure Impairs Visual-Spatial Discrimination in a Sex-Specific Manner: Effects of Testing Order and Difficulty on Learning Performance. *Alcohol Clin Exp Res*. doi:10.1111/acer.14426
- Kindsfather, A. J., Czekalski, M. A., Pressimone, C. A., Erisman, M. P., & Mann, M. R. W. (2019). Perturbations in imprinted methylation from assisted reproductive technologies but not advanced maternal age in mouse preimplantation embryos. *Clin Epigenetics*, 11(1), 162. doi:10.1186/s13148-019-0751-9
- Kleiber, M. L., Mantha, K., Stringer, R. L., & Singh, S. M. (2013). Neurodevelopmental alcohol exposure elicits long-term changes to gene expression that alter distinct molecular pathways dependent on timing of exposure. *J Neurodev Disord*, 5(1), 6. doi:10.1186/1866-1955-5-6
- Krueger, F. (2012). Trim Galore: a wrapper tool around Cutadapt and FastQC to consistently apply quality and adapter trimming to FastQ files, with some extra functionality for MspI-digested RRBS-type (Reduced Representation Bisulfite-Seq) libraries. URL [http://www.bioinformatics.babraham.ac.uk/projects/trim\\_galore/](http://www.bioinformatics.babraham.ac.uk/projects/trim_galore/). (Date of access: 28/04/2016).
- Lange, S., Probst, C., Gmel, G., Rehm, J., Burd, L., & Popova, S. (2017). Global Prevalence of Fetal Alcohol Spectrum Disorder Among Children and Youth: A Systematic Review and Meta-analysis. *JAMA Pediatr*, 171(10), 948-956. doi:10.1001/jamapediatrics.2017.1919
- Larsen, Z. H., Chander, P., Joyner, J. A., Floruta, C. M., Demeter, T. L., & Weick, J. P. (2016). Effects of Ethanol on Cellular Composition and Network Excitability of Human Pluripotent Stem Cell-Derived Neurons. *Alcohol Clin Exp Res*, 40(11), 2339-2350. doi:10.1111/acer.13218
- Laufer, B. I., Chater-Diehl, E. J., Kapalanga, J., & Singh, S. M. (2017). Long-term alterations to DNA methylation as a biomarker of prenatal alcohol exposure: From mouse models to human children with fetal alcohol spectrum disorders. *Alcohol*, 60, 67-75. doi:10.1016/j.alcohol.2016.11.009
- Laufer, B. I., Kapalanga, J., Castellani, C. A., Diehl, E. J., Yan, L., & Singh, S. M. (2015). Associative DNA methylation changes in children with prenatal alcohol exposure. *Epigenomics*, 7(8), 1259-1274. doi:10.2217/epi.15.60
- Legault, L.-M., Chan, D., & McGraw, S. (2019). Rapid multiplexed reduced representation bisulfite sequencing library prep (rRRBS). *Bio-Protocol*, 9, 4.
- Legault, L. M., Bertrand-Lehouillier, V., & McGraw, S. (2018). Pre-implantation alcohol exposure and developmental programming of FASD: an epigenetic perspective. *Biochem Cell Biol*, 96(2), 117-130. doi:10.1139/bcb-2017-0141
- Legault, L. M., Doiron, K., Lemieux, A., Caron, M., Chan, D., Lopes, F. L., . . . McGraw, S. (2020). Developmental genome-wide DNA methylation asymmetry between mouse placenta and embryo. *Epigenetics*, 15(8), 800-815. doi:10.1080/15592294.2020.1722922

- Lim, S. S., Vos, T., Flaxman, A. D., Danaei, G., Shibuya, K., Adair-Rohani, H., . . . Memish, Z. A. (2012). A comparative risk assessment of burden of disease and injury attributable to 67 risk factors and risk factor clusters in 21 regions, 1990-2010: a systematic analysis for the Global Burden of Disease Study 2010. *Lancet*, *380*(9859), 2224-2260. doi:10.1016/S0140-6736(12)61766-8
- Liu, J., Banerjee, A., Herring, C. A., Attalla, J., Hu, R., Xu, Y., . . . Gu, G. (2019). Neurog3-Independent Methylation Is the Earliest Detectable Mark Distinguishing Pancreatic Progenitor Identity. *Dev Cell*, *48*(1), 49-63.e47. doi:10.1016/j.devcel.2018.11.048
- Liyanage, V. R., Zachariah, R. M., Davie, J. R., & Rastegar, M. (2015). Ethanol deregulates Mecp2/MeCP2 in differentiating neural stem cells via interplay between 5-methylcytosine and 5-hydroxymethylcytosine at the Mecp2 regulatory elements. *Exp Neurol*, *265*, 102-117. doi:10.1016/j.expneurol.2015.01.006
- Lowe, R., Gemma, C., Rakyán, V. K., & Holland, M. L. (2015). Sexually dimorphic gene expression emerges with embryonic genome activation and is dynamic throughout development. *BMC Genomics*, *16*(1), 295. doi:10.1186/s12864-015-1506-4
- Lunde, E. R., Washburn, S. E., Golding, M. C., Bake, S., Miranda, R. C., & Ramadoss, J. (2016). Alcohol-Induced Developmental Origins of Adult-Onset Diseases. *Alcohol Clin Exp Res*, *40*(7), 1403-1414. doi:10.1111/acer.13114
- Lussier, A. A., Morin, A. M., MacIsaac, J. L., Salmon, J., Weinberg, J., Reynolds, J. N., . . . Kobor, M. S. (2018). DNA methylation as a predictor of fetal alcohol spectrum disorder. *Clin Epigenetics*, *10*, 5. doi:10.1186/s13148-018-0439-6
- Mandal, C., Halder, D., Jung, K. H., & Chai, Y. G. (2017). Gestational Alcohol Exposure Altered DNA Methylation Status in the Developing Fetus. *Int J Mol Sci*, *18*(7). doi:10.3390/ijms18071386
- Mantha, K., Laufer, B. I., & Singh, S. M. (2014). Molecular changes during neurodevelopment following second-trimester binge ethanol exposure in a mouse model of fetal alcohol spectrum disorder: from immediate effects to long-term adaptation. *Dev Neurosci*, *36*(1), 29-43. doi:10.1159/000357496
- Market-Velker, B. A., Zhang, L., Magri, L. S., Bonvissuto, A. C., & Mann, M. R. (2010). Dual effects of superovulation: loss of maternal and paternal imprinted methylation in a dose-dependent manner. *Hum Mol Genet*, *19*(1), 36-51. doi:10.1093/hmg/ddp465
- May, P. A., Baete, A., Russo, J., Elliott, A. J., Blankenship, J., Kalberg, W. O., . . . Hoyme, H. E. (2014). Prevalence and characteristics of fetal alcohol spectrum disorders. *Pediatrics*, *134*(5), 855-866. doi:10.1542/peds.2013-3319
- McGraw, S., Oakes, C. C., Martel, J., Cirio, M. C., de Zeeuw, P., Mak, W., . . . Trasler, J. M. (2013). Loss of DNMT1o disrupts imprinted X chromosome inactivation and accentuates placental defects in females. *PLoS Genet*, *9*(11), e1003873. doi:10.1371/journal.pgen.1003873
- McGraw, S., & Trasler, I. M. (2013). Oocyte epigenetics and the risks for imprinting disorders associated with assisted reproduction. *Biology and Pathology of the Oocyte: Role in Fertility, Medicine and Nuclear Reprogramming*, 384.
- McGraw, S., Zhang, J. X., Farag, M., Chan, D., Caron, M., Konermann, C., . . . Trasler, J. M. (2015). Transient DNMT1 suppression reveals hidden heritable marks in the genome. *Nucleic Acids Res*, *43*(3), 1485-1497. doi:10.1093/nar/gku1386
- Messerschmidt, D. M., Knowles, B. B., & Solter, D. (2014). DNA methylation dynamics during epigenetic reprogramming in the germline and preimplantation embryos. *Genes Dev*, *28*(8), 812-828. doi:10.1101/gad.234294.113
- Miozzo, F., Arnould, H., de Thonel, A., Schang, A. L., Sabéran-Djoneidi, D., Baudry, A., . . . Mezger, V. (2018). Alcohol exposure promotes DNA methyltransferase DNMT3A upregulation through reactive oxygen species-dependent mechanisms. *Cell Stress Chaperones*, *23*(1), 115-126. doi:10.1007/s12192-017-0829-2
- Oswald, J., Engemann, S., Lane, N., Mayer, W., Olek, A., Fundele, R., . . . Walter, J. (2000). Active demethylation of the paternal genome in the mouse zygote. *Curr Biol*, *10*(8), 475-478. doi:10.1016/s0960-9822(00)00448-6

- Öztürk, N. C., Resendiz, M., Öztürk, H., & Zhou, F. C. (2017). DNA Methylation program in normal and alcohol-induced thinning cortex. *Alcohol*, *60*, 135-147. doi:10.1016/j.alcohol.2017.01.006
- Padmanabhan, R., & Hameed, M. S. (1988). Effects of acute doses of ethanol administered at pre-implantation stages on fetal development in the mouse. *Drug Alcohol Depend*, *22*(1-2), 91-100. doi:10.1016/0376-8716(88)90042-7
- Pagé-Larivière, F., Campagna, C., & Sirard, M. A. (2017). Mechanisms Involved in Porcine Early Embryo Survival following Ethanol Exposure. *Toxicol Sci*, *156*(1), 289-299. doi:10.1093/toxsci/kfw256
- Paterno, R., Casalia, M., & Baraban, S. C. (2020). Interneuron deficits in neurodevelopmental disorders: Implications for disease pathology and interneuron-based therapies. *Eur J Paediatr Neurol*, *24*, 81-88. doi:10.1016/j.ejpn.2019.12.015
- Patten, A. R., Fontaine, C. J., & Christie, B. R. (2014). A comparison of the different animal models of fetal alcohol spectrum disorders and their use in studying complex behaviors. *Front Pediatr*, *2*, 93. doi:10.3389/fped.2014.00093
- Peat, J. R., Dean, W., Clark, S. J., Krueger, F., Smallwood, S. A., Ficz, G., . . . Reik, W. (2014). Genome-wide bisulfite sequencing in zygotes identifies demethylation targets and maps the contribution of TET3 oxidation. *Cell Rep*, *9*(6), 1990-2000. doi:10.1016/j.celrep.2014.11.034
- Pérez-Cerezales, S., Ramos-Ibeas, P., Rizos, D., Lonergan, P., Bermejo-Alvarez, P., & Gutiérrez-Adán, A. (2018). Early sex-dependent differences in response to environmental stress. *Reproduction*, *155*(1), R39-r51. doi:10.1530/rep-17-0466
- Perkins, A., Lehmann, C., Lawrence, R. C., & Kelly, S. J. (2013). Alcohol exposure during development: Impact on the epigenome. *Int J Dev Neurosci*, *31*(6), 391-397. doi:10.1016/j.ijdevneu.2013.03.010
- Petrelli, B., Weinberg, J., & Hicks, G. G. (2018). Effects of prenatal alcohol exposure (PAE): insights into FASD using mouse models of PAE. *Biochem Cell Biol*, *96*(2), 131-147. doi:10.1139/bcb-2017-0280
- Petropoulos, S., Edsgård, D., Reinius, B., Deng, Q., Panula, S. P., Codeluppi, S., . . . Lanner, F. (2016). Single-Cell RNA-Seq Reveals Lineage and X Chromosome Dynamics in Human Preimplantation Embryos. *Cell*, *165*(4), 1012-1026. doi:10.1016/j.cell.2016.03.023
- Piché, J., Gosset, N., Legault, L. M., Pacis, A., Oneglia, A., Caron, M., . . . Andelfinger, G. (2019). Molecular Signature of CAID Syndrome: Noncanonical Roles of SGO1 in Regulation of TGF- $\beta$  Signaling and Epigenomics. *Cell Mol Gastroenterol Hepatol*, *7*(2), 411-431. doi:10.1016/j.jcmgh.2018.10.011
- Pierre, W. C., Legault, L. M., Londono, I., McGraw, S., & Lodygensky, G. A. (2020). Alteration of the brain methylation landscape following postnatal inflammatory injury in rat pups. *FASEB J*, *34*(1), 432-445. doi:10.1096/fj.201901461R
- Popova, S., Lange, S., Probst, C., Gmel, G., & Rehm, J. (2017). Estimation of national, regional, and global prevalence of alcohol use during pregnancy and fetal alcohol syndrome: a systematic review and meta-analysis. *Lancet Glob Health*, *5*(3), e290-e299. doi:10.1016/s2214-109x(17)30021-9
- Popova, S., Lange, S., Probst, C., Parunashvili, N., & Rehm, J. (2016). Prevalence of alcohol consumption during pregnancy and Fetal Alcohol Spectrum Disorders among the general and Aboriginal populations in Canada and the United States. *Eur J Med Genet*. doi:10.1016/j.ejmg.2016.09.010
- Popova, S., Lange, S., Probst, C., Shield, K., Kraicer-Melamed, H., Ferreira-Borges, C., & Rehm, J. (2016). Actual and predicted prevalence of alcohol consumption during pregnancy in the WHO African Region. *Trop Med Int Health*, *21*(10), 1209-1239. doi:10.1111/tmi.12755
- Portales-Casamar, E., Lussier, A. A., Jones, M. J., Maclsaac, J. L., Edgar, R. D., Mah, S. M., . . . Kobor, M. S. (2016). DNA methylation signature of human fetal alcohol spectrum disorder. *Epigenetics Chromatin*, *9*, 25. doi:10.1186/s13072-016-0074-4
- Reik, W., Dean, W., & Walter, J. (2001). Epigenetic reprogramming in mammalian development. *Science*, *293*(5532), 1089-1093. doi:10.1126/science.1063443
- Rossignol, E. (2011). Genetics and function of neocortical GABAergic interneurons in neurodevelopmental disorders. *Neural Plast*, *2011*, 649325. doi:10.1155/2011/649325
- Sandor, S., Gârban, Z., Checiu, M., & Daradics, L. (1981). The presence of ethanol in the oviductal and uterine luminal fluids of alcoholized rats. *Morphol Embryol (Bucur)*, *27*(4), 303-309.

- Sanosaka, T., Imamura, T., Hamazaki, N., Chai, M., Igarashi, K., Ideta-Otsuka, M., . . . Nakashima, K. (2017). DNA Methylation Analysis Identifies Transcription Factor-Based Epigenomic Signatures of Multilineage Competence in Neural Stem/Progenitor Cells. *Cell Rep*, 20(12), 2992-3003. doi:10.1016/j.celrep.2017.08.086
- Sedgh, G., Singh, S., & Hussain, R. (2014). Intended and unintended pregnancies worldwide in 2012 and recent trends. *Stud Fam Plann*, 45(3), 301-314. doi:10.1111/j.1728-4465.2014.00393.x
- Seisenberger, S., Peat, J. R., Hore, T. A., Santos, F., Dean, W., & Reik, W. (2013). Reprogramming DNA methylation in the mammalian life cycle: building and breaking epigenetic barriers. *Philos Trans R Soc Lond B Biol Sci*, 368(1609), 20110330. doi:10.1098/rstb.2011.0330
- Skorput, A. G., Gupta, V. P., Yeh, P. W., & Yeh, H. H. (2015). Persistent Interneuronopathy in the Prefrontal Cortex of Young Adult Offspring Exposed to Ethanol In Utero. *J Neurosci*, 35(31), 10977-10988. doi:10.1523/jneurosci.1462-15.2015
- Skorput, A. G., Lee, S. M., Yeh, P. W., & Yeh, H. H. (2019). The NKCC1 antagonist bumetanide mitigates interneuronopathy associated with ethanol exposure in utero. *Elife*, 8. doi:10.7554/eLife.48648
- Skuse, D. H. (2000). Imprinting, the X-chromosome, and the male brain: explaining sex differences in the liability to autism. *Pediatric research*, 47(1), 9-9.
- Sulik, K. K., Johnston, M. C., & Webb, M. A. (1981). Fetal alcohol syndrome: embryogenesis in a mouse model. *Science*, 214(4523), 936-938. doi:10.1126/science.6795717
- Tan, C. H., Denny, C. H., Cheal, N. E., Sniezek, J. E., & Kanny, D. (2015). Alcohol use and binge drinking among women of childbearing age - United States, 2011-2013. *MMWR Morb Mortal Wkly Rep*, 64(37), 1042-1046. doi:10.15585/mmwr.mm6437a3
- Tan, K., Wang, Z., Zhang, Z., An, L., & Tian, J. (2016). IVF affects embryonic development in a sex-biased manner in mice. *Reproduction*, 151(4), 443-453. doi:10.1530/rep-15-0588
- Terasaki, L. S., Gomez, J., & Schwarz, J. M. (2016). An examination of sex differences in the effects of early-life opiate and alcohol exposure. *Philos Trans R Soc Lond B Biol Sci*, 371(1688), 20150123. doi:10.1098/rstb.2015.0123
- Theiler, K. (2013). *The house mouse: atlas of embryonic development*: Springer Science & Business Media.
- Thomas, G. (2012). Levels and patterns of alcohol use in Canada. Alcohol Price Policy Series. Report 1. Ottawa, ON: Canadian Centre on Substance Abuse., <http://www.ccsa.ca/Resource%20Library/CCSA-Patterns-Alcohol-Use-Policy-Canada-2012-en.pdf>.
- Toppings, M., Castro, C., Mills, P. H., Reinhart, B., Schatten, G., Ahrens, E. T., . . . Trasler, J. M. (2008). Profound phenotypic variation among mice deficient in the maintenance of genomic imprints. *Hum Reprod*, 23(4), 807-818. doi:10.1093/humrep/den009
- Welch-Carre, E. (2005). The neurodevelopmental consequences of prenatal alcohol exposure. *Adv Neonatal Care*, 5(4), 217-229. doi:10.1016/j.adnc.2005.04.007
- Whidden, L., Martel, J., Rahimi, S., Chaillet, J. R., Chan, D., & Trasler, J. M. (2016). Compromised oocyte quality and assisted reproduction contribute to sex-specific effects on offspring outcomes and epigenetic patterning. *Hum Mol Genet*, 25(21), 4649-4660. doi:10.1093/hmg/ddw293
- Wiebold, J. L., & Becker, W. C. (1987). In-vivo and in-vitro effects of ethanol on mouse preimplantation embryos. *J Reprod Fertil*, 80(1), 49-57. doi:10.1530/jrf.0.0800049
- Wilsnack, S. C., Wilsnack, R. W., & Kantor, L. W. (2013). Focus on: women and the costs of alcohol use. *Alcohol Res*, 35(2), 219-228.
- Wu, D., & Cederbaum, A. I. (2003). Alcohol, oxidative stress, and free radical damage. *Alcohol Res Health*, 27(4), 277-284.
- Xi, Y., & Li, W. (2009). BSMAP: whole genome bisulfite sequence MAPPING program. *BMC Bioinformatics*, 10, 232. doi:10.1186/1471-2105-10-232
- Yun, K., Fischman, S., Johnson, J., Hrabe de Angelis, M., Weinmaster, G., & Rubenstein, J. L. (2002). Modulation of the notch signaling by Mash1 and Dlx1/2 regulates sequential specification and differentiation of progenitor cell types in the subcortical telencephalon. *Development*, 129(21), 5029-5040.

- Zhang, Y., Xiang, Y., Yin, Q., Du, Z., Peng, X., Wang, Q., . . . Xie, W. (2018). Dynamic epigenomic landscapes during early lineage specification in mouse embryos. *Nat Genet*, *50*(1), 96-105. doi:10.1038/s41588-017-0003-x
- Zhou, Y., Zhou, B., Pache, L., Chang, M., Khodabakhshi, A. H., Tanaseichuk, O., . . . Chanda, S. K. (2019). Metascape provides a biologist-oriented resource for the analysis of systems-level datasets. *Nat Commun*, *10*(1), 1523. doi:10.1038/s41467-019-09234-6
- Zhu, P., Guo, H., Ren, Y., Hou, Y., Dong, J., Li, R., . . . Tang, F. (2018). Single-cell DNA methylome sequencing of human preimplantation embryos. *Nat Genet*, *50*(1), 12-19. doi:10.1038/s41588-017-0007-6



**A**

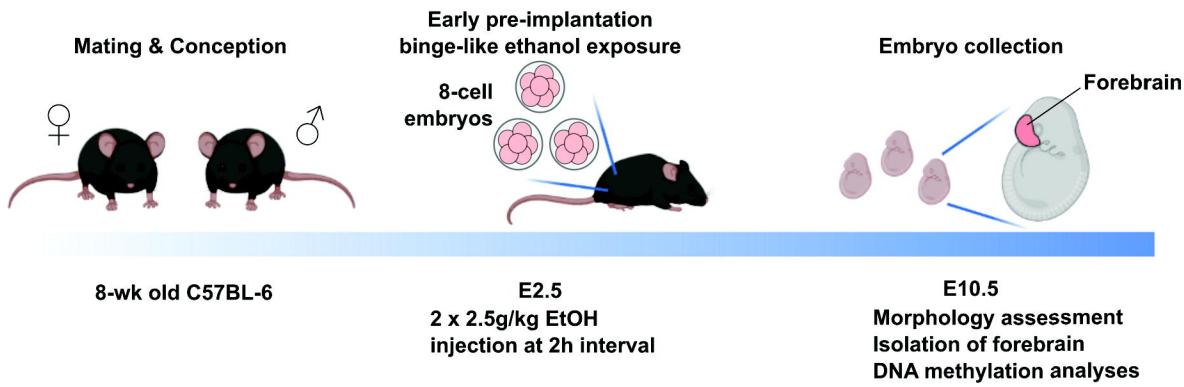

**B**

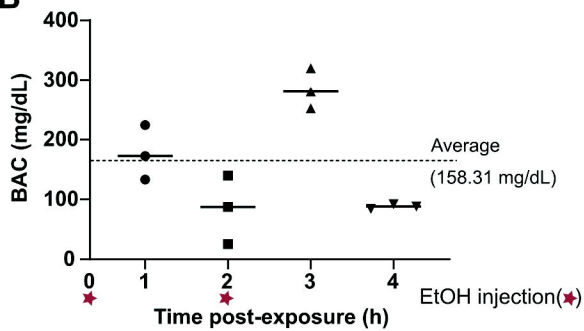

**C**

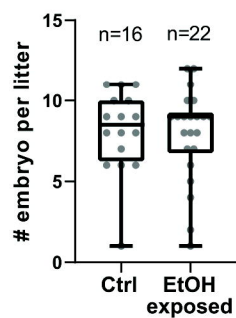

**D**

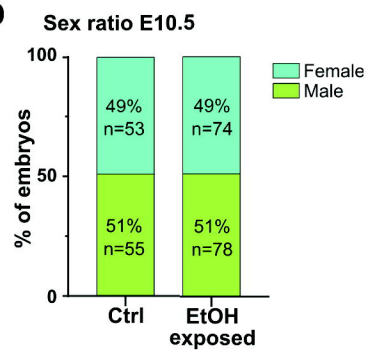

**E**

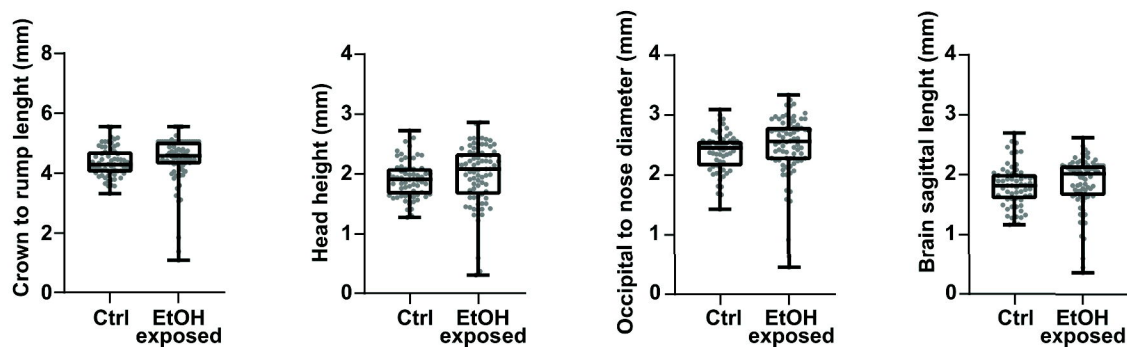



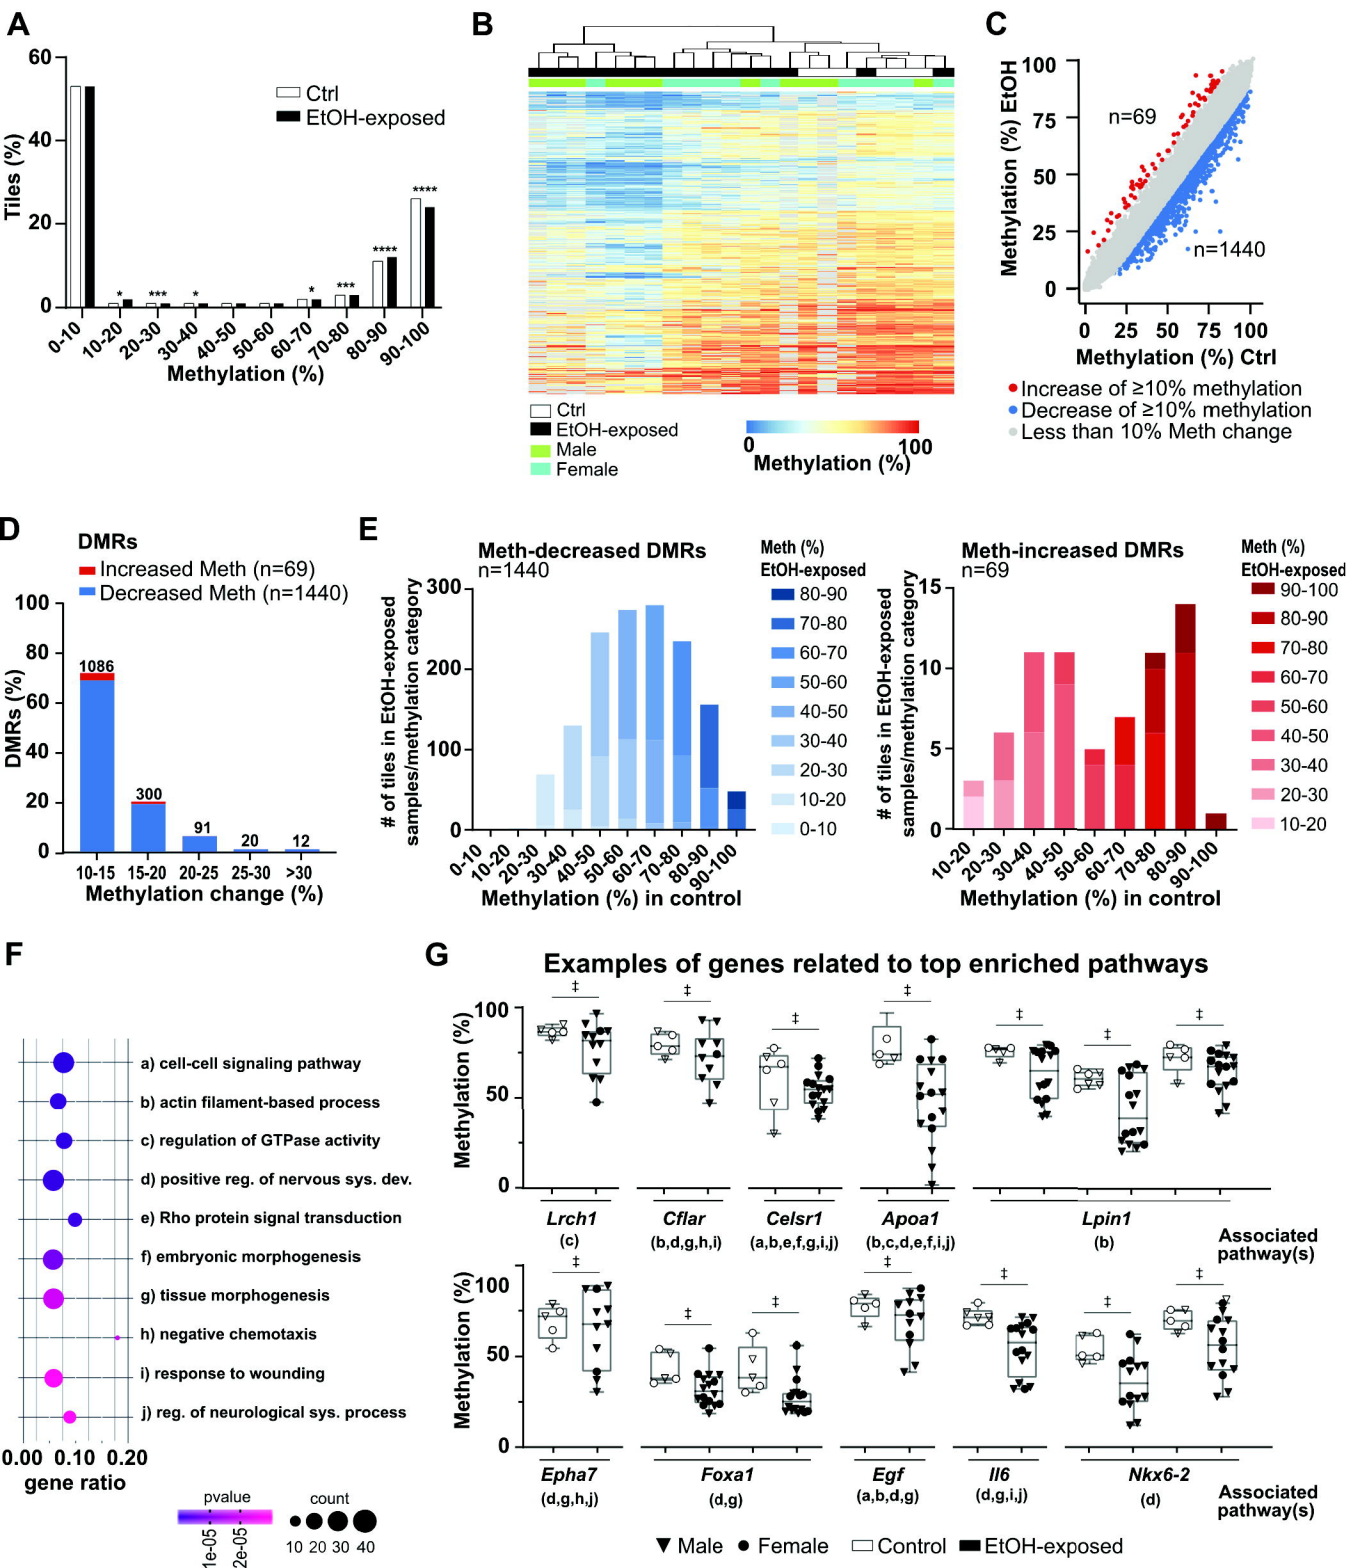

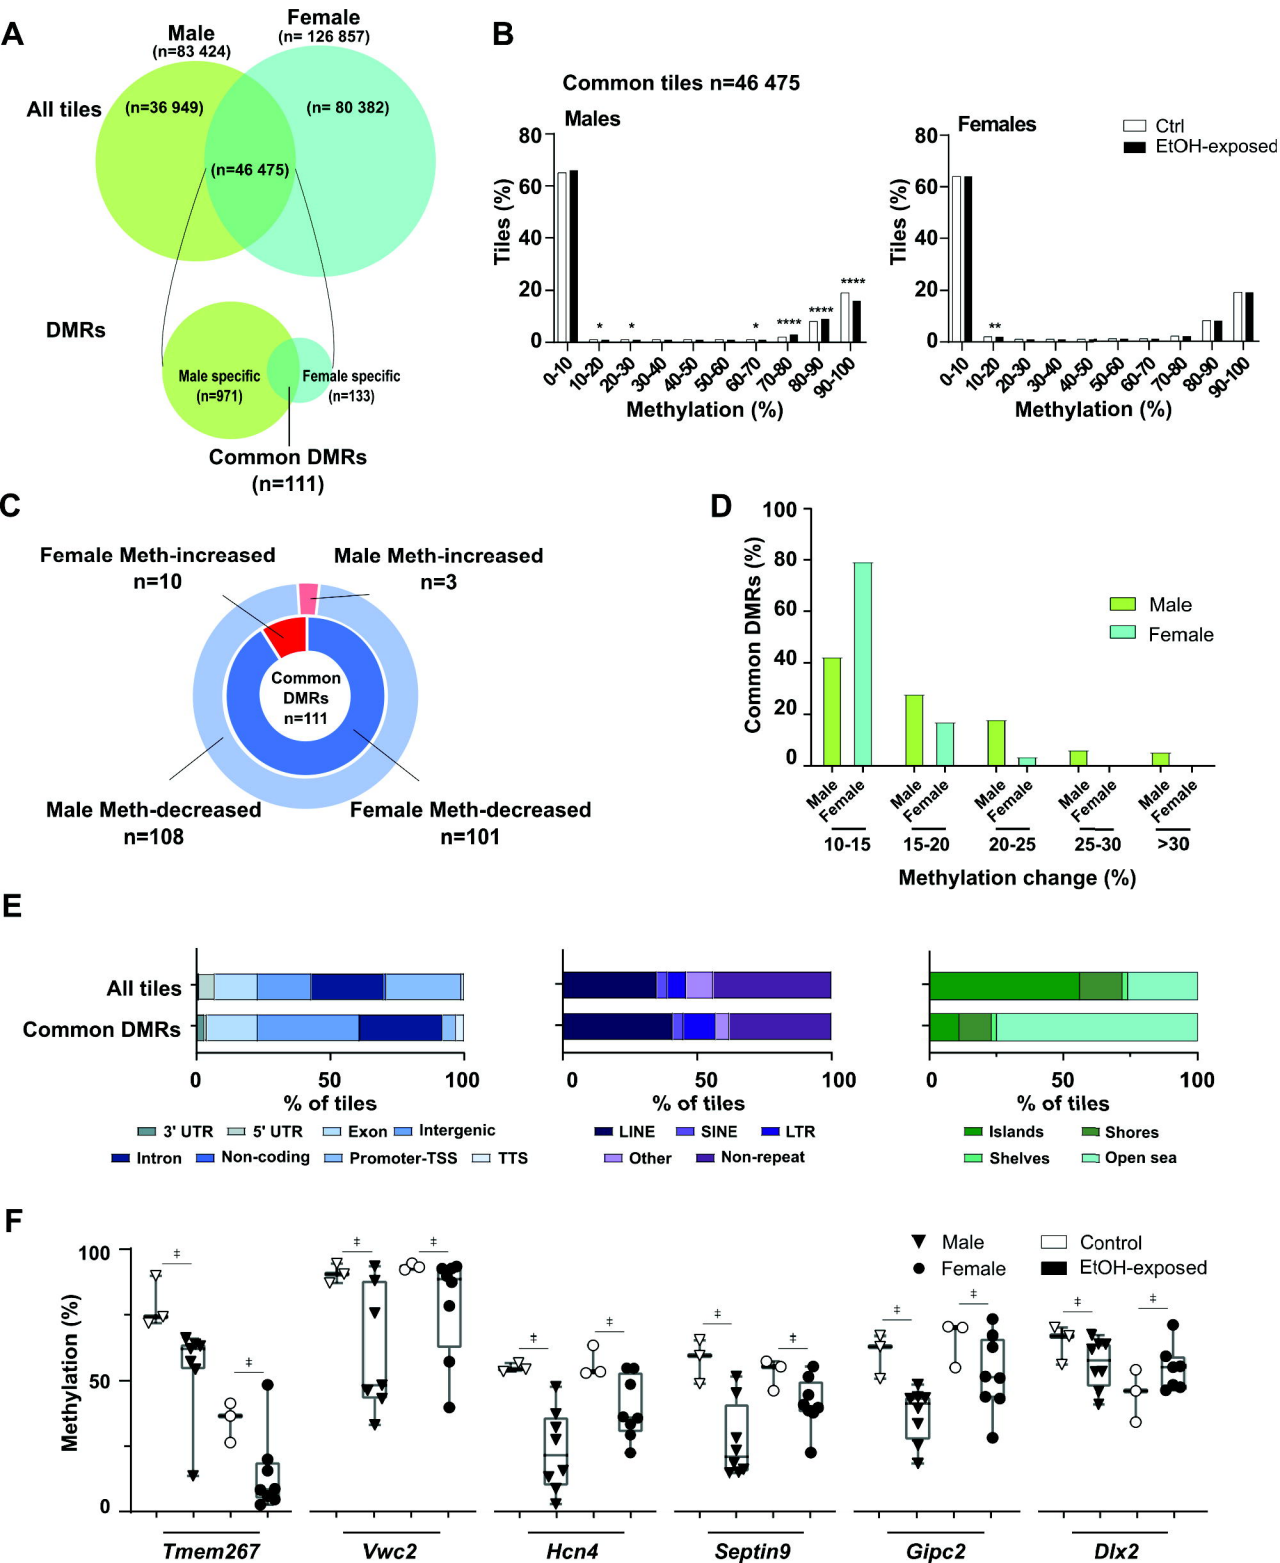

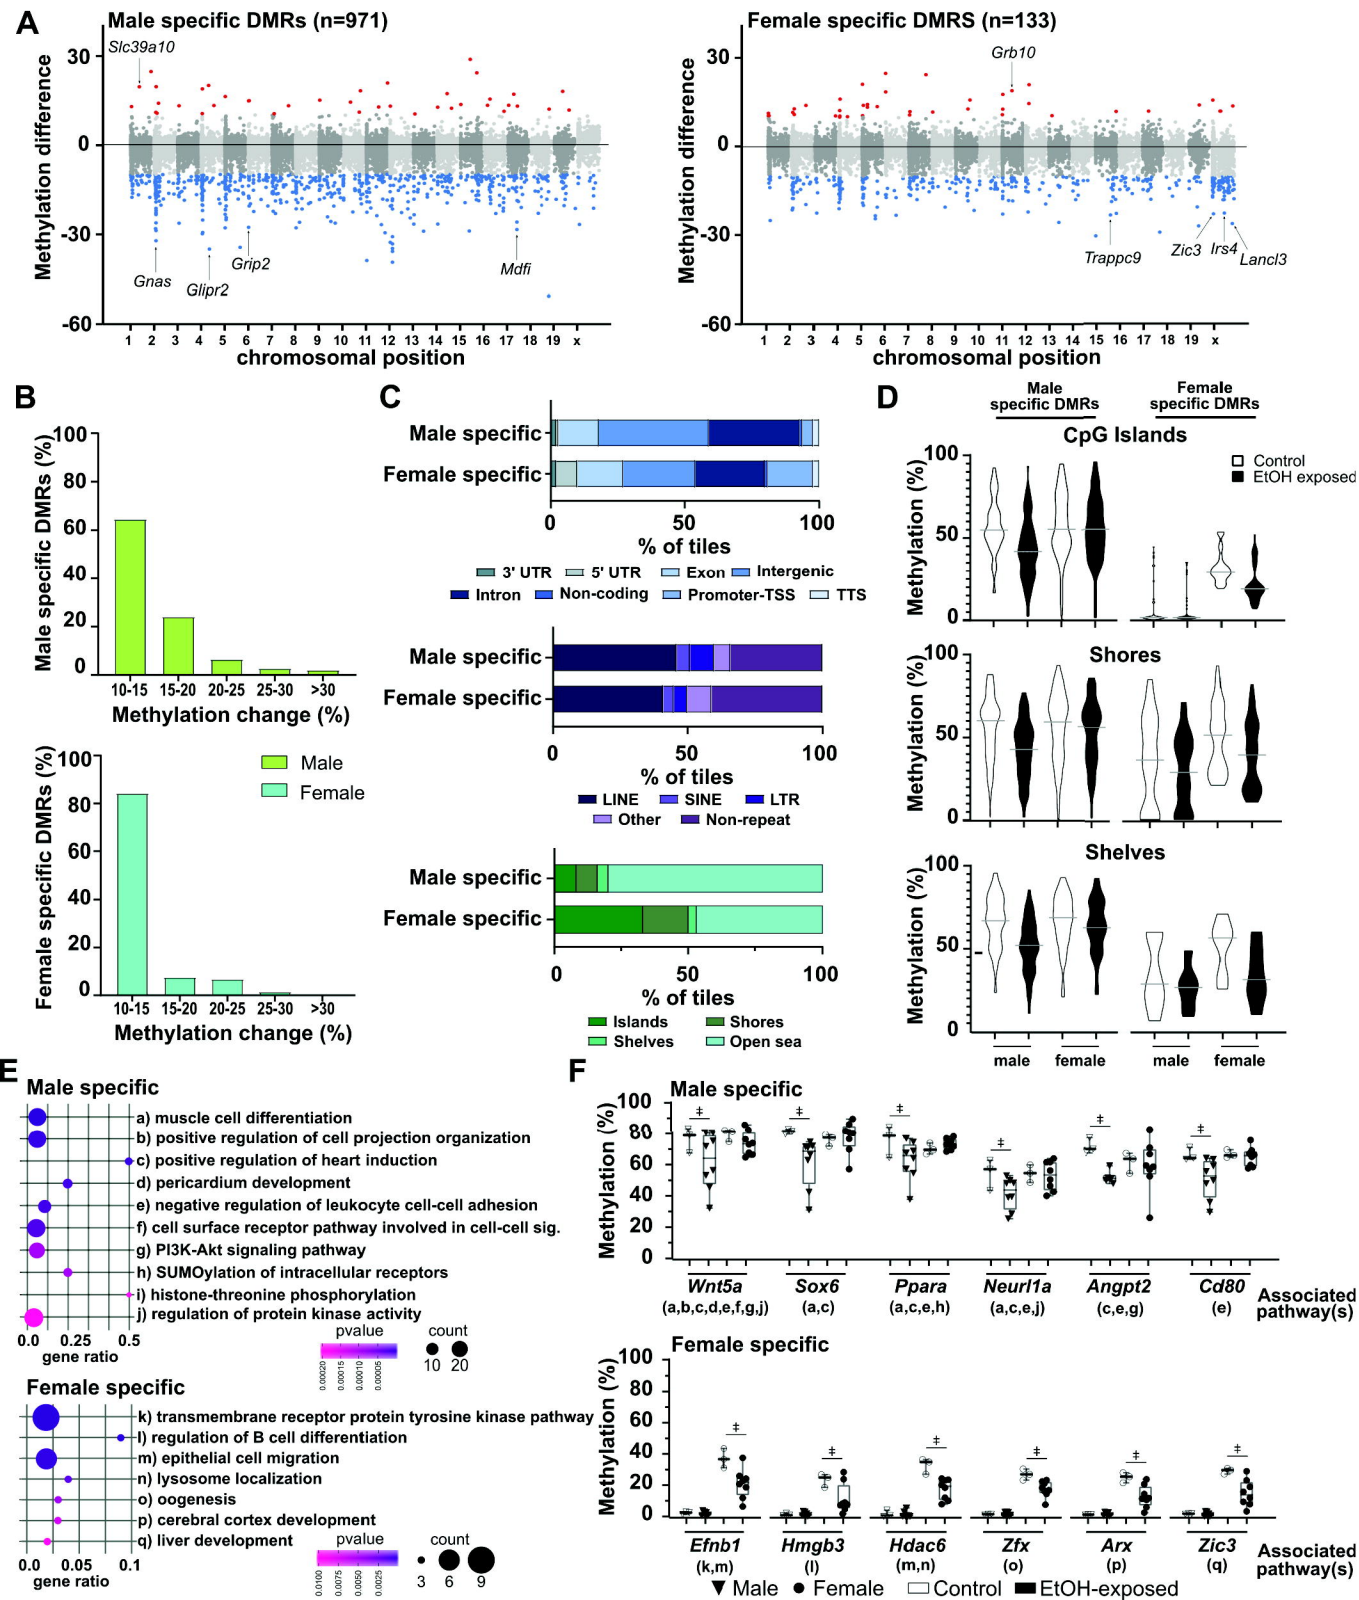

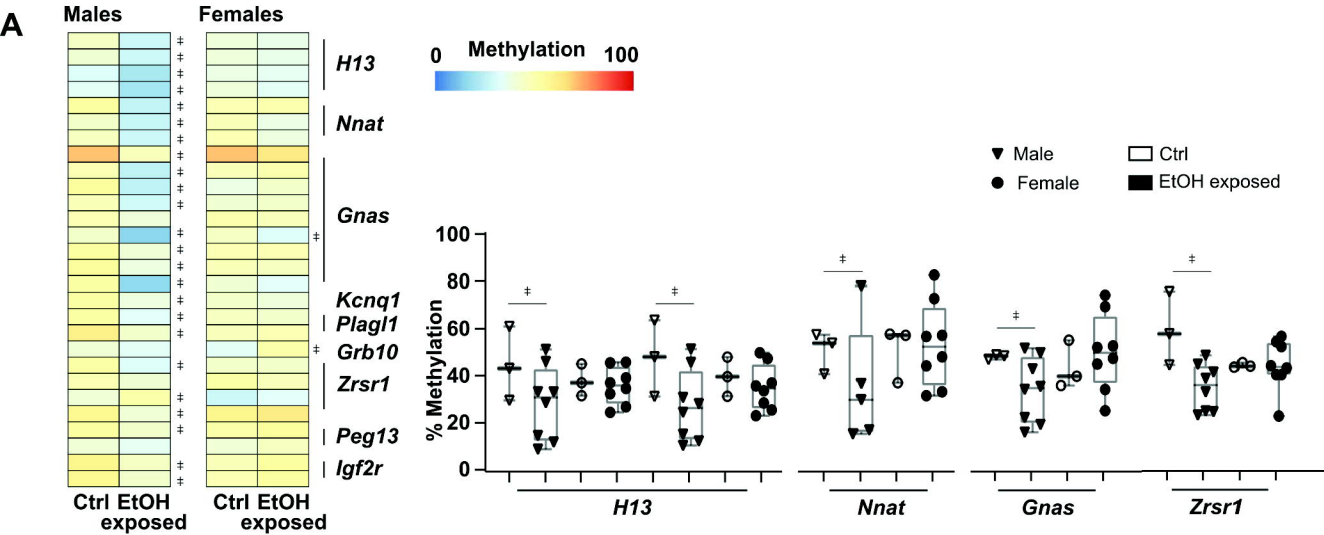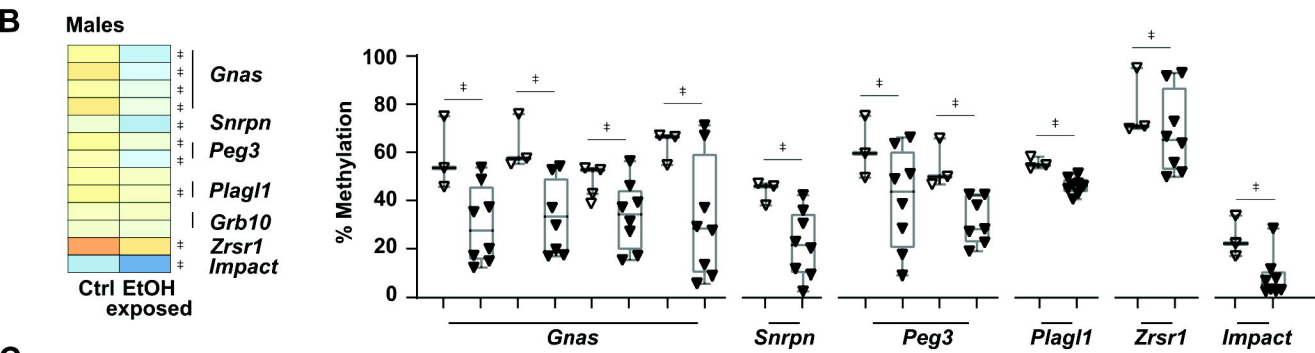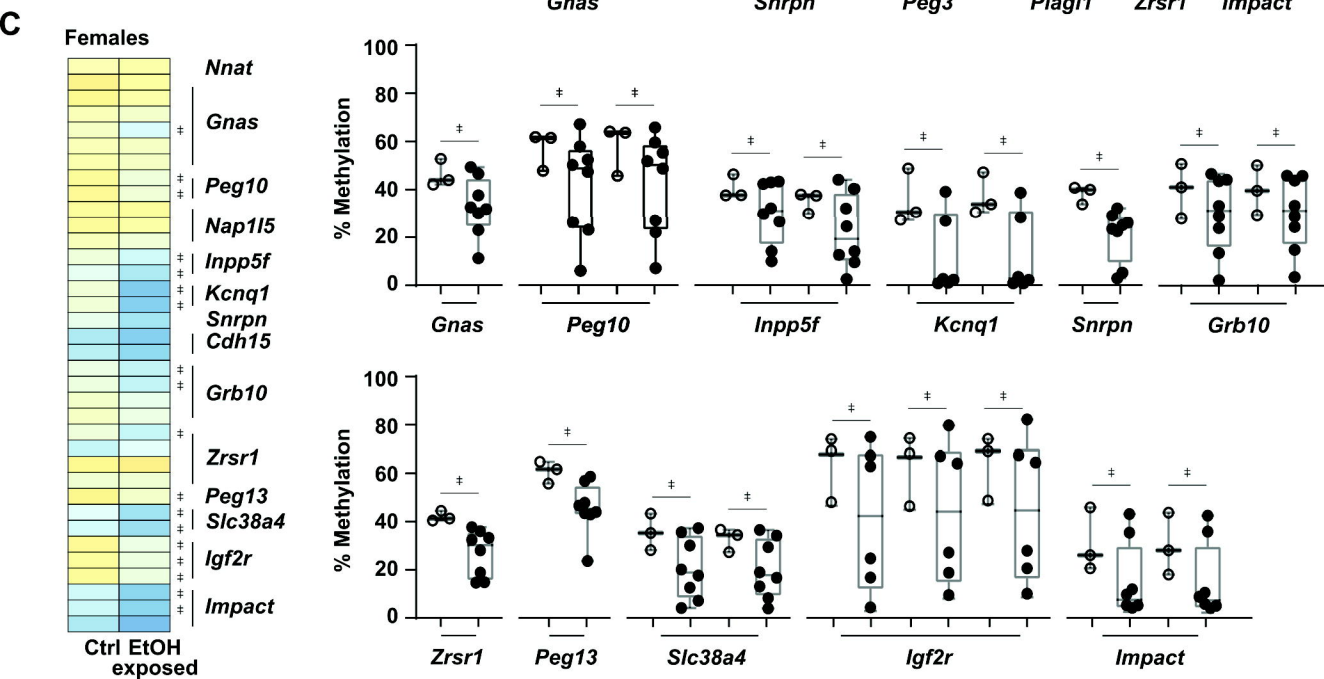

Source: http://biorxiv.org/content/10.1101/2020.12.07.415208v2.full.pdf
