1                   **Pre-Implantation Alcohol Exposure Induces Lasting Sex-Specific DNA**  
2                   **Methylation Programming Errors in the Developing Forebrain**

3  
4  
5  
6 Legault LM<sup>1,2</sup>, Doiron K<sup>1</sup>, Breton-Larrivée M<sup>1,2</sup>, Langford-Avelar A<sup>1,2</sup>, Lemieux A<sup>1,2</sup>, Caron M<sup>1</sup>,  
7 Jerome-Majewska LA<sup>3,4</sup>, Sinnott D<sup>1,5</sup>, McGraw S<sup>1,2,6,#</sup>.

8  
9 <sup>1</sup>CHU Sainte-Justine Research Center, Montreal, Canada.

10 <sup>2</sup>Department of Biochemistry and Molecular Medicine, Université de Montréal, Montreal, Canada.

11 <sup>3</sup>McGill University Health Centre Glen Site, Montreal, Canada.

12 <sup>4</sup>Department of Pediatrics, McGill University, Montreal, Canada.

13 <sup>5</sup>Department of Pediatrics, Université de Montréal, Montreal, Canada.

14 <sup>6</sup>Department of Obstetrics and Gynecology, Université de Montréal, Montreal, Canada.

15  
16 <sup>#</sup>Corresponding author: [serge.mcgraw@umontreal.ca](mailto:serge.mcgraw@umontreal.ca)  
17

1 **ABSTRACT**

2 **Background**

3 Prenatal alcohol exposure is recognized for altering DNA methylation profiles of brain cells during  
4 development, and to be part of the molecular basis underpinning Fetal Alcohol Spectrum Disorder  
5 (FASD) etiology. However, we have negligible information on the effects of alcohol exposure during  
6 pre-implantation, the early embryonic window marked with dynamic DNA methylation  
7 reprogramming, and on how this may rewire the brain developmental program.

8 **Results**

9 Using a pre-clinical *in vivo* mouse model, we show that a binge-like alcohol exposure during pre-  
10 implantation at the 8-cell stage leads to surge in morphological brain defects and adverse  
11 developmental outcomes during fetal life. Genome-wide DNA methylation analyses of fetal  
12 forebrains uncovered sex-specific alterations, including partial loss of DNA methylation maintenance  
13 at imprinting control regions, and abnormal *de novo* DNA methylation profiles in various biological  
14 pathways (e.g., neural/brain development).

15 **Conclusion**

16 These findings support that alcohol-induced DNA methylation programming deviations during pre-  
17 implantation could contribute to the manifestation of neurodevelopmental phenotypes associated with  
18 FASD.

19

20 Keywords: Prenatal Exposure, Fetal Alcohol Spectrum Disorders, DNA methylation, Early  
21 Embryonic Development, Epigenetic Reprogramming, Imprinting.

22

## 1 INTRODUCTION

2 Fetal Alcohol Spectrum Disorders (FASD) encompasses the range of lifelong cognitive and  
3 physical disabilities observed in children born to mothers who consumed alcohol during pregnancy  
4 (1-4). Each year, 600 000 to 1 million children are born with FASD worldwide (5, 6). The most  
5 severe and physically visible form of the condition is known as Fetal Alcohol Syndrome (FAS), in  
6 ~10% of FASD cases, and associated with the full presentation of dysmorphic features including  
7 craniofacial malformations, growth deficits and structural brain pathologies. Depending on the  
8 amount, pattern and developmental period of prenatal alcohol exposure, children may not present  
9 with dysmorphic features, but still suffer from mild to severe FASD-related neurological disabilities,  
10 such as learning deficits and intellectual delays (1, 2). With the marked increase in rates of alcohol  
11 use and binge drinking behavior (7) among 18-34 year old women (8-14), added to the high number  
12 of unintended pregnancies worldwide (~40%; 85 million/year (15)), many women may inadvertently  
13 subject their developing embryos to acute levels of alcohol in first weeks of pregnancy. Although  
14 most studies state that alcohol consumption at all stages of pregnancy can cause FASD, pre-  
15 implantation is arguably the stage that is most prone to unintentional prenatal alcohol exposure since  
16 the human chorionic gonadotrophin (hCG) hormone, the main biomarker for pregnancy, is not yet  
17 detectable as it is only produced following implantation. Still, there is ample misinformation in the  
18 literature regarding the effects of alcohol exposure, and many other teratogen exposures, on pre-  
19 implantation embryos, and how this leads to an “*all-or-nothing*” developmental outcome.

20 An increasing body of evidence indicates that alcohol exposure during fetal brain development  
21 triggers lasting epigenetic alterations, including DNA methylation, in offspring long after the initial  
22 insult, supporting the role of epigenetics in FASD phenotypes (16-19). However, we remain unaware  
23 of how ethanol affects the early developmental window marked with dynamic changes in DNA  
24 methylation, and how interfering with this fundamental process may program future FASD-related  
25 neurological disabilities. During pre-implantation development, the period between oocyte

1 fertilization and embryo implantation in the uterus, the epigenome undergoes a broad reprogramming  
2 that initiates the developmental program (20-26). We and others have shown that this essential  
3 reprogramming wave removes most DNA methylation signatures across the genome, except specific  
4 sequences that include imprinting control regions (ICRs), to trigger the embryonic developmental  
5 program (20, 27-29). DNA methylation marks are then reacquired in a sex-, cell- and tissue-specific  
6 manner during the peri-implantation period, and marks continue to be modulated during lineage  
7 specification (30-33). Studies show that pre-implantation embryos can have sex-specific epigenetic  
8 responses to similar environmental challenges, leading to long-term sexual dimorphism in  
9 developmental programming trajectories (34-37).

10 One of the first indications of the direct link between ethanol exposure and aberrations in  
11 DNA methylation came from a mouse study showing that mid-gestation exposure at E9-E11 reduced  
12 global DNA methylation levels in E11 fetuses (17). This evidence gave rise to different FASD models  
13 using various levels of short or prolonged alcohol exposures at different stages of gestation. Ethanol  
14 exposure can either induce DNA methyltransferases (DNMTs) activity, through reactive oxygen  
15 species-dependent mechanisms (38, 39), or inhibit DNMTs activity, via direct action on DNMTs or  
16 on one-carbon metabolism that provides methyl groups (17, 40), which supports why both gain and  
17 loss of DNA methylation marks can be observed in FASD models. High levels of ethanol exposure on  
18 two consecutive days (E1.5, E2.5) altered DNA methylation of imprinted gene *H19*, a negative  
19 regulator of growth and proliferation, in the placenta at E10.5, yet this region showed no alteration in  
20 the embryo (41). Nonetheless, data remain very scarce on how alcohol exposure during the early  
21 stages of embryo development directly affects epigenetic reprogramming and permanently alters  
22 genome-wide DNA methylation.

23 In this study, we used a pre-clinical mouse model of prenatal alcohol exposure to specifically  
24 target pre-implantation embryos that are undergoing their epigenetic reprogramming wave. We show

1 that this exposure leads to a surge in morphological brain defects during fetal life, and that exposed  
2 embryos with no visible abnormalities or developmental delays present lasting DNA methylation  
3 alterations in forebrain tissues, including sex-specific disparities in DNA methylation dysregulation.

4

## 5 **RESULTS**

6 *Modeling early pre-implantation alcohol exposure increases phenotypic alterations in developing*  
7 *embryos.*

8 To define the developmental and epigenetic (i.e., DNA methylation) impact of a binge alcohol  
9 exposure episode on early embryos undergoing the epigenetic reprogramming wave, we first  
10 established a pre-clinical mouse model to specifically expose pre-implantation embryos (E2.5) to  
11 short, but elevated alcohol levels. To avoid possible confounding effects of gavage-associated stress,  
12 we used a well-recognized two-injection paradigm (42-45). Pregnant mice (C57BL/6) were  
13 subcutaneously injected at E2.5 (8-cell embryos) with two doses of 2.5g/kg ethanol (**EtOH-exposed**),  
14 or 0.15M saline (**control**), at 2h intervals (**Fig. 1A**). Pregnant females reached a peak blood alcohol  
15 concentration (**BAC**) of 284.27mg/dL (3h) with an average of 158.31mg/dL over a 4h window (**Fig.**  
16 **1B**). In contrast with other chronic prenatal alcohol exposure models (46-49), this short but acute  
17 level of ethanol exposure on pre-implantation embryos did not affect average mid-gestational (E10.5)  
18 litter size (Ctrl;  $n=8.13 \pm 2.58$  vs EtOH-exposed;  $n=7.91 \pm 2.86$ ), or sex distribution (Ctrl and EtOH-  
19 exposed; 49% female vs 51% males). Similarly, early pre-implantation embryos subjected to binge-  
20 like alcohol levels did not show differences in mean morphological measurements at E10.5, however,  
21 we observed a significant increase in embryo-to-embryo variability for crown to rump length  
22 ( $p<0.0001$ ), head height ( $p<0.01$ ), occipital to nose diameter ( $p<0.001$ ) and brain sagittal length  
23 ( $p<0.05$ ) for EtOH-exposed embryos compared to controls. The greater intra-subject variability

1 observed suggests that binge alcohol exposure levels during pre-implantation can alter the normal  
2 developmental programming of early embryos, thus causing abnormal morphological outcomes.

3 To define how a binge alcohol exposure episode during early pre-implantation can affect fetal  
4 development, we next investigated the morphological outcome of E10.5 embryos (control embryos:  
5 n=108 from 16 litters, EtOH-exposed: n=152 from 22 litters). As observed in **Fig. 2A**, early pre-  
6 implantation EtOH exposure leads to a significant increase in morphological defects or delayed  
7 development of mid-gestation embryos (19% vs 2%,  $p < 0.0001$ ). Types of defects observed in  
8 ethanol-exposed embryos included brain anomalies (e.g., forebrain or midbrain malformations)  
9 (10%), growth restriction or delayed development (5%), heart defects (2%), and other abnormal  
10 features (2%) (**Fig. 2B**, **Fig. 2C**). There was no sex-specific phenotypic divergence between EtOH-  
11 exposed male and female embryos for morphological defects (18% vs 20%, **Fig. S1**) or defect  
12 categories (**Fig. S1**). Compared to controls, we observed that binge alcohol exposure during pre-  
13 implantation leads to a larger proportion of E10.5 embryos with phenotypic alterations (29/152 vs  
14 2/108,  $p < 0.0001$ ), and that embryos with phenotypic alterations are distributed across most ethanol-  
15 exposed litters (16/22 vs 2/16,  $p < 0.001$ ) (**Fig. 2D**) and not restricted to a small number of litters.  
16 Taken together, these results show that a binge alcohol exposure episode on pre-implantation embryos  
17 undergoing the epigenetic reprogramming wave does not interfere with normal processes of  
18 implantation but leads to heterogeneity in morphological presentation during fetal life that mirrors the  
19 spectrum of clinical features associated to FASD.

## 20 *Pre-implantation alcohol exposure causes alterations in forebrain DNA methylation profiles*

21 To assess whether alcohol exposure during the embryonic epigenetic reprogramming wave  
22 dysregulates the normal programming of brain DNA methylation patterns during fetal development,  
23 we established genome-wide DNA methylation profiles using rRRBS on E10.5 mouse forebrains. To  
24 mirror the 90% of children with FASD that show no dysmorphic features but still suffer from mild to

1 severe neurological disabilities (e.g., learning deficits, intellectual delays), we randomly selected 6  
2 controls (3 males; 3 females) and 16 ethanol-exposed embryos (8 males; 8 females) of similar size  
3 (i.e., embryo size, head height, occipital to nose diameter, brain sagittal length) with no visible  
4 morphological defects (Fig. S2). Histological analysis revealed that ethanol-exposed embryos with no  
5 visible morphological defects or developmental delays had a general layout and distribution of brain  
6 cells that were comparable to controls (Fig. S3A-B), whereas ethanol-exposed embryo with delayed  
7 development were distinctly different (Fig. S3C). Furthermore, using markers for proliferation (Ki67  
8 antigen) and apoptosis (cleaved Caspase-3), we confirmed that the early ethanol exposure did not  
9 promote an imbalance in cell proliferative response (Fig. S4) or cell death (Fig. S5) across brain  
10 regions of embryos with no apparent morphological defects. By removing embryos with  
11 abnormalities, developmental delays, or gross brain structure aberration, we further reduced potential  
12 DNA methylation variability that could be due to divergent forebrain cell type proportions between  
13 samples.

14 The first set of analyses was designed to define whether early pre-implantation alcohol  
15 exposure caused lasting DNA methylation alterations in developing E10.5 embryonic forebrains  
16 despite the absence of phenotypic presentation. To do so, we compared the average DNA methylation  
17 levels in 100 bp non-overlapping genomic windows (*tiles*; see methods section) between controls and  
18 ethanol-exposed samples. After removal of sex chromosomes, we identified 114 911 unique  
19 sequenced tiles containing 794 803 common CpGs across samples (min. 5 samples/condition,  $\geq 10\times$   
20 sequencing depth). When tiles were classified according to their DNA methylation levels, we  
21 observed significant changes in the distribution of categories, including tiles ranging between 90-  
22 100% methylation for which we observed a decrease in ethanol-exposed forebrains compared to  
23 controls (26% vs 24%,  $p < 0.0001$  (Fig. 3A). Clustering of individual E10.5 forebrain samples by DNA  
24 methylation levels for the top 1% most variable tiles ( $n=1200$ ) revealed three main subgroups; a first

1 essentially composed of control samples (6/9; right in heatmap), a second mainly composed of  
2 ethanol-exposed female samples with similarities to controls patterns (5/6; middle in heatmap), and a  
3 third mostly composed of male ethanol-exposed samples with highly divergent patterns (6/7; left in  
4 heatmap) (**Fig. 3B**). We next identified regions of the genome that showed altered DNA methylation  
5 levels ( $\pm \geq 10\%$  mean differences between tiles; see methods) as a result of the early pre-implantation  
6 alcohol exposure. Using such criteria, we identified 1509 differentially methylations regions (**DMRs**)  
7 with significant DNA methylation level decrease (n=1440) or increase (n=69) in EtOH-exposed  
8 forebrains compared to control forebrains (**Fig. 3C**). Differences in methylation levels ranged from  
9 10%-55%, with most DMRs showing 10-15% (n=1086; 72%) or 15-20% (n=300; 20%) methylation  
10 change between EtOH-exposed and control forebrains (**Fig. 3D**). Most DMR-associated tiles with  
11 decreased methylation levels in EtOH-exposed samples (n=1239) were highly methylated ( $\geq 40\text{-}50\%$ )  
12 in control samples, whereas DMRs that gained methylation in EtOH-exposed samples had variable  
13 levels in controls (**Fig. 3E**). The DMRs mainly overlapped with intergenic (43%) and genic (53%:  
14 introns; 37%, exons; 12%, and promoters; 4%) regions. Gene ontology enrichment analyses  
15 associated genic DMRs with various processes, including cell-to-cell signaling pathway, regulation of  
16 GTPase activity, positive regulation of nervous system development, tissue and embryonic  
17 morphogenesis, as well as regulation of neurological systems (**Fig. 3F**). When we looked at the DNA  
18 methylation levels between control and EtOH-exposed forebrains for genes associated to these  
19 enriched pathways (e.g., *Lrch1*, *Cflar*, *Celsr1*, *Apoa1*, *Lpin1*, *Epha7*, *Foxa1*, *Egf*, *Il6*, *Nkx6-2*), we  
20 observed increased inter-individual variability in methylation levels for EtOH-exposed forebrains  
21 with some samples or genomic regions being more affected than others (**Fig. 3G**).

22 Overall, we showed that alcohol exposure during the embryonic epigenetic reprogramming  
23 wave triggers an array of DNA methylation alterations observed in forebrain of embryos that  
24 presented no visible abnormalities or developmental delays at E10.5.



1

2

### 3 *Sex-specific DNA methylation alterations following pre-implantation alcohol exposure*

4 We next sought to discern whether early pre-implantation alcohol exposure could have a sex-  
5 specific impact on later forebrain DNA methylation patterns. By analyzing male and female samples  
6 separately (min. 3 samples/condition/sex,  $\geq 10x$  sequencing depth), we identified 83 424 and 126 857  
7 unique sequenced tiles in male and female forebrains, respectively (**Fig. 4A**). Although there were  
8 lesser regions analyzed in males, they showed a larger number of DMRs following pre-implantation  
9 alcohol exposure (DMRs: males  $n=2\ 097$ , females  $n=1\ 273$ ) (**Fig. S6**). In male EtOH-exposed  
10 forebrains, we found 2097 DMRs of which 1936 (92%) showed decreased methylation. Comparably,  
11 female EtOH-exposed forebrains revealed 1273 DMRs of which 1066 (84%) presented decreased  
12 methylation (**Fig. S6A-D**). We also observed contrasts between DMR number, as well as associated  
13 biological processes among sexes (**Fig. S6E**). However, we do not exclude that these results could be  
14 related to only a partial overlap in sequenced regions ( $n=46\ 475$ ) between male and female forebrain  
15 samples (**Fig. 4A**).

16 To circumvent this issue, we focused on the 46 475 regions with sufficient sequencing  
17 coverage in both sexes encompassing 373 530 CpGs (**Fig. 4A**). We did not observe any differences in  
18 global DNA methylation levels between sexes in either controls or ethanol-exposed forebrains (males:  
19 29.4% vs 28.7%, females: 29.4% vs 29.2%; not shown). However, when these common tiles ( $n=$   
20 46 475) were distributed according to their DNA methylation levels in control and ethanol-exposed  
21 forebrains, we observed a greater shift in tile distribution in male EtOH-exposed samples (**Fig. 4B**),  
22 suggesting a greater effect on males. Accordingly, among the 46 475 male-female common tiles, we  
23 identified 971 male-specific DMRs, 133 female-specific DMRs, and 111 DMRs that were present in

1 both sexes (**Fig 4A**). Out of these 111 common DMRs, 100 had similar alteration profiles (i.e., n=99  
2 DMRs with decreased methylation, n=1 DMR with increased methylation) in male and female EtOH-  
3 exposed forebrains (**Fig. 4C**). For the other DMRs (n=11), the alcohol exposure caused conflicting  
4 alteration profiles between sexes (e.g., decreased-methylation in males vs increased-methylation in  
5 females). For the most part, the common DMRs displayed low levels of methylation changes (10-  
6 15% range) for both sexes (42% for males, 79% for females), with methylation changes greater than  
7 25% only present in male EtOH-exposed samples (**Fig. 4D**). When compared to the 46 475 common  
8 tiles analyzed, the 111 common DMRs were more enriched in intergenic regions and intron  
9 categories, as well as for LINE elements, whereas they were mostly depleted of CpG rich sequences  
10 (i.e. CpG islands). In addition, common DMRs in male and female EtOH-exposed forebrains showed  
11 various levels of DNA methylation for an assortment of genes, including *Tmem267* (putative  
12 oncogene), *Vwc2* (neural development and function), *Hcn4* (cardiac function), *Septin9* (cytoskeletal  
13 formation), *Gipc2* (gastrointestinal processes) and *Dlx2* (forebrain and craniofacial development)  
14 (**Fig. 4F, Fig. S7**).

15 When we turned our attention to male-specific (n=971) and female-specific (n=133) DMRs  
16 within the 46 475 common tiles, we observed that pre-implantation alcohol exposure had a more  
17 profound impact on male forebrains in terms of DMR number and level of methylation changes (**Figs.**  
18 **4A, 5A**). Although a portion of observed DMRs showed increased methylation (males 3%; n=31,  
19 females 23%; n=30), the majority of sex-specific DMRs were associated with a partial loss of DNA  
20 methylation (males n=940, females n=103) in all chromosomes. The only chromosomes that showed  
21 an enrichment ( $p < 0.0001$ ) in DMRs were female X-chromosomes (n=48/133). Most of these sex-  
22 specific DMRs showed low levels of alterations, in the 10-15% range (males n=627 DMRs; 65%,  
23 females n=112 DMRs; 84%), with males having a larger proportion of DMRs with >15% methylation  
24 changes (**Fig. 5B**). When we highlighted genomic features associated to these sex-specific DMRs, we

1 observed more female-specific DMRs in promoter regions (17% vs 4%) and CpG rich regions (33%  
2 vs 8%) when compared to male-specific DMRs (**Fig. 5C**). When we focused on the distribution of  
3 CpG sites in a sequence context (i.e., CpG islands, shores, shelves), we noticed a significant loss of  
4 global methylation in male-specific DMRs for male EtOH-exposed forebrains, and similarly for  
5 female-specific in female EtOH-exposed forebrains (**Fig. 5D**). For female-specific DMRs, we noticed  
6 that DNA methylation levels in control forebrains are all higher in females compared to males. These  
7 higher methylation levels are mainly associated with the presence of methylation marks associated to  
8 the X-inactivation process in females (female-specific DMRs on X-chromosome: CpG islands 35/44;  
9 shores 9/36, shelves 0/6. **Fig. 5F** bottom for examples). The sex-specific DMRs resulting from pre-  
10 implantation alcohol exposure were related to divergent biological processes between males (e.g.,  
11 muscle differentiation, cell projection organization) and females (e.g., receptor protein tyrosine kinase  
12 pathway, epithelial cell migration) (**Figs. 5E, 5F**).

13 We then evaluated whether early embryonic alcohol exposure led to expression errors in the  
14 forebrains of E10.5 embryos by focussing on a group of genes (with or without DMRs) implicated in  
15 the regulatory network coordinating the timing of GABAergic interneuron migration and forebrain  
16 formation. At the core of this network is the *Dlx* family of homeodomain transcription factors (50,  
17 51). We show that *Dlx2* (DMR in gene body; males and females) and *Dlx1* (no DMRs) have small but  
18 significant changes in gene expression (*Dlx2*: males and females; *Dlx1*: females) (**Fig. S8A**), whereas  
19 for *Dlx5* and *Dlx6* (no DMRs), the expression remained unchanged (**Fig. S8B**). Upstream key  
20 regulator of MGE (medial ganglionic eminence)-derived GABAergic interneurons (52-54), *Nkx2.1*  
21 (no DMRs) did not show expression alterations (**Fig. S8B**), however downstream transcription factors  
22 such as *Sox6* (DMR in gene body; males), and *Arx* (direct target of *Dlx2* (55, 56)), DMR in promoter;  
23 females) showed small but significant gene expression alteration (*Sox6*; males and females, *Arx*;  
24 males) (**Fig. S8A**).

1            Together, these results indicate that alcohol exposure in pre-implantation embryos in  
2 conjunction with epigenetic reprogramming leads to variable levels of sex-specific alterations, with  
3 male embryonic forebrains being more prone to DNA methylation alterations. This suggests that pre-  
4 implantation male embryos are more susceptible to the initial adverse exposure rendering them less  
5 efficient at re-establishing proper DNA methylation patterns during the *de novo* methylation wave, or  
6 that female embryonic cells are better at rectifying dysregulated DNA methylation patterns during  
7 development.

### 8 ***Pre-implantation alcohol exposure leads to partial loss of imprinted DNA methylation patterns***

9            To further determine if a binge alcohol exposure episode on early embryos undergoing the  
10 epigenetic reprogramming wave is more adverse on the DNA methylation patterns of male or female  
11 embryos, we directed our attention to ICRs of imprinted genes, which are well known for their key  
12 roles in brain development and growth. We and others have shown that allele-specific methylation  
13 maintenance is required on ICRs during the reprogramming wave, as partial or complete loss of ICR  
14 profiles is permanent. Since our alcohol exposure specifically targets E2.5 embryos (8-cell stage),  
15 dysregulation in ICRs methylation maintenance would still be detectable in E10.5 forebrains. From  
16 the 46 475 commonly sequenced tiles, 28 were located within the ICRs of 9 imprinted genes. Our  
17 non-allele specific differential methylation analysis revealed that out of these 28 regions, 24 were  
18 differentially methylated in male EtOH-exposed forebrains. These 24 DMRs were associated to  
19 imprinted genes *H13*, *Nnat*, *Gnas*, *Kcnq1*, *Plagl1*, *Zrsr1*, *Peg13* and *Igf2r* (**Fig. 6A**). In females, only  
20 2 of those 28 tiles showed altered levels in female EtOH-exposed forebrains, which were associated  
21 with *Gnas* and *Grb10*. We expanded our search for dysregulated ICR DNA methylation patterns  
22 within uniquely sequenced regions in male (n=36 949 tiles) and female (n=80 382 tiles) forebrains  
23 (**Fig. 4A**) to retrieve additional ICR-associated tiles. Again, in EtOH-exposed male forebrains, the  
24 majority of ICRs (10/13 tiles) showed altered DNA methylation patterns (**Fig. 6B**), which were

1 associated with *Gnas*, *Snrpn*, *Peg3*, *Plagl1*, *Zrsr1* and *Impact*. Conversely, in EtOH-exposed female  
2 forebrains, we now observed a large portion of ICRs (19/36 tiles) with dysregulated DNA  
3 methylation levels associated to various imprinted genes (i.e., *Gnas*, *Peg10*, *Inpp5f*, *Kcnq1*, *Snrpn*,  
4 *Grb10*, *Zrsr1*, *Peg13*, *Slc38a4*, *Igf2r* and *Impact*). When we plotted individual sample DNA  
5 methylation values for these ICR-associated DMRs, we again observed a high degree of heterogeneity  
6 in EtOH-forebrains with some samples showing altered DNA methylation levels (e.g., partial loss,  
7 complete loss), and others revealing normal control methylation values (**Fig. 6A-C**).

8 This partial loss of DNA methylation signatures within ICRs of male and female E10.5 EtOH-  
9 exposed forebrains was associated with small but significant deviation in expression level for a  
10 number of imprinted genes (e.g., *Gnas*, *Plagl1*, *Peg13*) (**Fig. S9A**). Whereas for others, although we  
11 observed similar ICR-associated DMRs, we did not detect any alteration in imprinted gene expression  
12 (e.g., *Impact*, *Peg10*, *Grb10*) for either male or female E10.5 EtOH-forebrains (**Fig. S9B**).

13 Both male and female EtOH-exposed forebrains showed variable levels of DNA methylation  
14 alterations in imprinted gene ICRs, which suggests that a binge-like alcohol exposure during pre-  
15 implantation interferes with the DNA methylation maintenance machinery during the epigenetic  
16 reprogramming wave. Finally, these results also suggest that male pre-implantation embryos are  
17 more susceptible to the initial adverse of alcohol exposure.

18

## 19 **DISCUSSION**

20 In this study, we showed that a binge alcohol exposure episode on early-stage embryos (8-cell;  
21 E2.5) leads to a surge in morphological brain defects and delayed development during fetal life, that  
22 are reminiscent of clinical features associated to FASD. As seen in children exposed to alcohol  
23 prenatally, a portion of ethanol-exposed embryos presented a spectrum of alcohol-induced

1 macroscopic defects while the majority showed no noticeable dysmorphic features and not alterations.  
2 However, forebrain tissues from ethanol-exposed embryos with no visible macroscopic abnormalities,  
3 developmental delays, alteration in cell proliferative response or cell death still presented lasting  
4 genome-wide DNA methylation alterations in genes associated to various biological pathways,  
5 including neural/brain development, and tissue and embryonic morphogenesis. These ethanol-  
6 exposed embryos also showed partial loss of imprinted DNA methylation patterns for various  
7 imprinted genes critical for fetal growth, development, and brain function. Moreover, we observed  
8 alcohol-induced sex-specific errors in DNA methylation patterns with male-embryos showing  
9 increased vulnerability.

#### 10 ***Modeling early pre-implantation alcohol exposure***

11 One of the challenges when modeling FASD is unscrambling direct and indirect outcomes  
12 associated with the amount, pattern (continuous vs. binge drinking), and developmental timing of  
13 alcohol exposure (18, 19, 45, 57-63). By targeting pre-implantation embryo, we observed that a  
14 binge-like alcohol exposure on a single embryonic cell type (8-cell stage blastomeres) leads to  
15 increased rate of macroscopic defects (e.g., brain anomalies, growth restriction, heart defects) across  
16 litters, with no impact on litter size or on sex-specific phenotypic representation during fetal life.  
17 These findings corroborate with pioneer work that reported abnormal fetal development without  
18 significant reduction in litter size following exposure during pre-implantation (64, 65). However, the  
19 acute dosage regimen paradigms used in those studies resulted in a much higher rate (67% to 100%)  
20 of embryonic abnormalities and severe growth retardation, as well as fetal death (41, 66).  
21 Nevertheless, such studies along with others (67) confirm that even prior to direct maternal-fetal  
22 interface exchanges via the placenta, alcohol can reach the developing pre-implantation embryos  
23 through the female reproductive track. *In vitro* studies support that pre-implantation embryos are  
24 sensitive and negatively affected by alcohol exposure (68). Although less investigated and understood

1 than maternal exposure, studies suggest that alterations (e.g., epigenetic errors) initiated on the  
2 fathers' sperm are passed-on during fertilization to pre-implantation embryos, influence development  
3 beyond implantation, and lead to abnormal offspring development (e.g., fetal growth restriction, birth  
4 defects, placental defects) (58, 69-72).

5 It remains to be defined whether some of the milder abnormalities or delays that we observed  
6 at mid-gestation would become resolved or accentuated by birth, and whether embryos that presented  
7 no visible abnormalities or developmental delays but had DNA methylation alterations would show  
8 cognitive dysfunctions as observed in other FASD-models and children with FASD. In parallel,  
9 outlining if the dysregulation in DNA methylation profiles is associated with abnormal migration and  
10 organization of specific brain cell subtypes during development would further extend our  
11 understanding about the effect of early pre-implantation alcohol exposure on the neurobiological  
12 phenotype in offspring.

### 13 ***Pre-implantation alcohol exposure leads to partial loss of imprinted DNA methylation***

14 Our genome-wide, high-resolution analysis of ethanol-induced DNA methylation alterations  
15 highlighted partial loss of DNA methylation maintenance within various 100bp tiles located across  
16 imprinting control regions (e.g., *Gnas*, *Zrsr1*, *Impact*) in E10.5 male and female forebrains. Then  
17 again, methylation alterations were not necessarily widespread across entire imprinting control  
18 regions, or in all individual ethanol-exposed embryos, suggesting only a slight reduction in  
19 DNMT1/DNMT1o maintenance activity. Concordantly, some imprinted genes showed alterations in  
20 their expression profiles (e.g., *Gnas*, *Plagl1*, *Peg13*) in both male and female EtOH-exposed  
21 forebrains, whereas others (e.g., *Impact*, *Peg10*, *Grb10*) were not affected. We know that temporary  
22 lack of DNA methylation maintenance by DNMT1o in 8-cell embryos (E2.5) leads to delays in  
23 development and to a wide range of lethal anatomical abnormalities that are associated with  
24 epigenetically mosaic embryos that failed to properly maintain normal imprinted methylation patterns

1 at mid-gestation (73-75). In zebrafish, alcohol exposure during the two first days of embryo  
2 development led to reduced levels of *Dnmt1* expression (76), which could ultimately lead to a  
3 temporary reduction in methylation maintenance activity. Studies aiming at defining how pre-  
4 implantation embryos respond to environmental stimuli (e.g., assisted reproductive technologies,  
5 toxicants, ethanol) have broadly explored the impact on imprinted genes, but have mainly relied on  
6 evaluating DNA methylation levels of imprinting control regions using targeted approaches (i.e.,  
7 specific genomic loci) (41, 77, 78). Although informative, conclusions are often based on profiling  
8 DNA methylation levels of a limited number of CpG sites associated to a handful of genes. For  
9 instance, modeling binge alcohol exposure during two consecutive days (E1.5, E2.5) led to decreased  
10 fetal and placental weight by E10.5, but only to a partial loss of DNA methylation in the *H19* —a  
11 negative regulator of growth and proliferation— imprinting control region (only 17 CpG analysed) in  
12 the placenta. Although only a portion of one ICR was evaluated, these results insinuated that  
13 embryonic imprinted methylation was not affected by such early pre-implantation alcohol exposure.

14 Since imprinted genes are well recognized in regulating essential neurodevelopmental  
15 processes, including neural differentiation, migration and cell survival (79), we can presume that the  
16 forebrain of ethanol-exposed embryos with severe macroscopic defects and developmental delays  
17 would have broader loss of imprinted DNA methylation patterns compared to those with no visible  
18 abnormalities. However, the fact that morphologically normal forebrain tissues derived from ethanol-  
19 exposed pre-implantation embryos reveal widespread low-level DNA methylation alterations with  
20 increased inter-individual variability in imprinted control regions supports that failure in maintaining  
21 accurate methylation imprints could contribute to the invisible nature of FASD.

### 22 ***Pre-implantation alcohol exposure initiates sex-specific DNA methylation programming errors***

23 We demonstrated that exposing 8-cell embryos to alcohol is detrimental for future forebrain  
24 autosomal and X-chromosome DNA methylation patterns. Furthermore, such an early embryonic



1 exposure leads to sex-specific DNA methylation alterations with male embryos being more  
2 susceptible to alterations. Early embryonic developmental stages are marked by a series of molecular  
3 events that are crucial for the proper establishment of the developmental program, as well as the *de*  
4 *novo* genome-wide DNA methylation signatures that are conserved throughout development (29, 80).  
5 A considerable amount of evidence shows that interfering with this process *in vivo* or *in vitro* leads to  
6 sex-specific long-term effects in the offspring (36, 72, 81-87). Although the mechanism remains  
7 unclear, we know that molecular events in early-stage embryos are marked with sex-specific  
8 discrepancies. For instance, mammalian pre-implantation embryos display differential expression of  
9 sex chromosome and autosomal transcripts, leading to extensive transcriptional sexual dimorphism  
10 (88, 89). In mouse, sex-biased gene expression (n=69; mainly X-linked) is detected as early as the 8-  
11 cell stage with substantial variation between individual embryos, and with female embryos expressing  
12 higher transcript levels. Then, just prior to the *de novo* re-methylation wave, the sex chromosomes  
13 seem to further drive this sexual dimorphism in transcriptional regulation for hundreds of autosomal  
14 genes, with *Dnmt3a* and *Dnmt3b* showing higher expression in male blastocyst (90). This is  
15 consistent with sex-specific acquisition of DNA methylation reported in bovine blastocyst, with males  
16 showing increased levels (89, 91). Thus, the alcohol-induced sex-specific DNA methylation  
17 alterations resulting from an early embryonic alcohol exposure model are mostly initiated at the 8-cell  
18 stage because of the male-female differences in transcriptional regulation. The DNA methylation  
19 alterations would then trigger a series of events that would negatively impact the re-establishment of  
20 genome-wide *de novo* DNA methylation profiles occurring between E3.5 and E6.5 in a sex-specific  
21 manner, with males being more affected. Once established, these abnormal *de novo* DNA methylation  
22 profiles would be maintained or would initiate further DNA methylation alterations during subsequent  
23 developmental stages. Since the sex-specific alterations observed in the forebrains are linked to  
24 divergent biological pathways, this could lead to sex-specific neurocognitive impairments in

1 offspring. Although such observations have been made in children with FASD, with males appearing  
2 to be more vulnerable to the irreversible effects of fetal alcohol exposure (e.g., cranial and facial  
3 malformations, learning disabilities, social and memory disabilities, and altered brain structure and  
4 function) (reviewed in (92)), further studies are needed to explore the long-term degree and impact of  
5 the sexual dimorphism in this pre-implantation alcohol exposure paradigm.

## 6 ***Pre-implantation alcohol exposure and impact on neurodevelopment***

7 One common phenotype observed in human FASD and animal models of prenatal alcohol  
8 exposure is the interference of alcohol on the development of the central nervous system (structural or  
9 functional abnormalities). We observed DNA methylation alterations in promoters and bodies of  
10 genes implicated in brain and nervous system function and development (e.g., *Dlx2*, *Epha7*, *Foxa1*,  
11 *Nkx6*, *Vwc2*, *Sox6*). For example, *Dlx2* (Distal-Less Homeobox 2), is part of a transcription factor  
12 family (*Dlx1/2*; *Dlx3/4*; *Dlx5/6*) that is critical molecular determinants for forebrain and craniofacial  
13 development, as well as for coordinating the timing of GABA(gamma-aminobutyric acid)ergic  
14 interneuron migration and process formation (93-96). *Dlx2* is required to promote the expression of  
15 several downstream factors including other *Dlx* genes and *Arx* (directly activated by *Dlx2*) (56), an X-  
16 linked gene that also controls cortical interneuron migration and differentiation (97), which  
17 incidentally showed altered DNA methylation in female ethanol-exposed forebrains. Ethanol-exposed  
18 forebrains showed reduced methylation in *Dlx2* (gene body) and *Arx* (promoter), which correlated  
19 with reduced *Dlx2* and *Arx* expression, whereas the average expression of *Dlx5* and *Dlx6* (no DMRs)  
20 remained unchanged. Mice lacking *Dlx1/2* have profound deficits in tangential migration of  
21 GABAergic cortical interneurons and neurite growth. Similarly, prenatal stress-induced anxiety in  
22 mouse leads to GABAergic interneuron deficiency-associated dysregulation of promoter DNA  
23 methylation levels of *Gad67* (glutamic acid decarboxylase 67), an enzyme critical for GABA  
24 synthesis (the principal inhibitory neurotransmitter). In prenatal alcohol exposure models targeting

1 different brain developmental time points, the migration and positioning of GABAergic cortical  
2 interneurons are profoundly impaired, leading to subsequent cortical dysfunction (98-102). We know  
3 that cortical interneuron dysfunction, associated with impaired development, migration, or function of  
4 interneurons, results in interneuronopathies that contribute to multiple neurodevelopmental disorders  
5 including autism, epilepsy, schizophrenia, and FASD (103-105). We also know that GABAergic  
6 interneurons are particularly responsive to adverse maternal exposures during *in utero* periods of  
7 developmental plasticity; from the moment these cells arise, to the shaping of cortical circuits (101,  
8 105). Our data suggest that early embryonic alcohol exposure triggers alterations in the epigenome  
9 that leave lasting signals that could lead to pathological plasticity in the developing brain. We need to  
10 further define whether GABAergic interneurons, or other cortical neurons, are particularly vulnerable  
11 to early embryonic alcohol-induced epigenetic programming errors, and whether this could drive  
12 interneuronopathies or neurodevelopmental impairments associated with FASD.

### 13 ***Study Limitation***

14 One limitation to our study is the absence of information about the dose-dependency of  
15 alcohol exposure with regards to the phenotypes and molecular consequences observed. Since higher  
16 peak blood alcohol concentrations have been shown to play a critical role in the extent of prenatal  
17 alcohol exposure-related damages (17, 18, 45, 48, 66, 86, 106), we can presume that similar  
18 observations would be observed using our paradigm. Nonetheless, the impact of low-dose and early  
19 prenatal alcohol exposure should not be overlooked, as they have been associated to increase the risk  
20 of mental illness regardless of a FAS or FASD diagnosis in human (review in (107)). To fully  
21 comprehend the wide range of detrimental consequences (visible and invisible) associated to dose-  
22 dependency of alcohol exposure during pre-implantation will require a thorough investigation across  
23 pre- and post-natal development.

1

2

### 3 **CONCLUSION**

4           We showed that pre-implantation alcohol exposure is detrimental for normal development and  
5 leads to a broad spectrum of adverse outcomes that closely replicate clinical facets observed in  
6 children with FASD. Specifically, we demonstrated that a binge-like drinking episode while pre-  
7 implantation embryos are in the mist of their reprogramming wave leads to two main categories of  
8 lasting programming errors: the partial loss of DNA methylation at several imprinted control regions,  
9 and the abnormal re-establishment of *de novo* DNA methylation profiles in key biological pathways  
10 (e.g., neural/brain development, tissue and embryonic morphogenesis). Further studies in peri-  
11 implantation embryos, when DNA methylation is globally reacquired, and in specific cell subtypes  
12 during key neocortex developmental time points will provide a better understanding of the  
13 fundamental mechanisms leading to these DNA methylation programming errors and their  
14 implication in neurodevelopmental FASD-related deficits. Importantly, our data demonstrate that pre-  
15 implantation alcohol exposure does not lead to an “all-or-nothing” response, as morphologically  
16 normal embryos still presented conserved and sex-specific DNA methylation alterations in forebrain  
17 tissues, which could be indicative of the particular sexual dimorphism in cognitive dysfunctions  
18 associated with FASD. Thus, our study provides strong scientific evidence to refute the “all-or-  
19 nothing” principle and supports the potential contribution of early embryonic epigenetic alterations to  
20 the manifestation of neurodevelopmental phenotypes observed in a portion of children with FASD.

21

### 22 **METHODS**

#### 23 **Pre-implantation embryo binge-like ethanol exposure model**

1 Animal work was approved by the Comité Institutionnel de Bonnes Pratiques Animales en  
2 Recherche (CIBPAR) of the CHU Ste-Justine Research Center under the guidance of the Canadian  
3 Council on Animal Care (CCAC). Female C57BL/6 mice (8-week-old) were mated with same age  
4 C57BL/6 males (Charles River laboratories). Females that showed copulatory plugs the next morning  
5 were considered pregnant with day 0.5 embryos (E0.5). They were separated from the males and  
6 housed together in a 12h light/dark cycle with unlimited access to food and water.

7 Using a recognized prenatal binge-like alcohol exposure paradigm (41, 45, 66, 106), pregnant  
8 females (E2.5) were injected with 2 subsequent doses of 2.5g/kg ethanol 50% (ethanol-exposed  
9 group) or an equivalent volume of saline (control group) at 2 hours intervals. Female with the same  
10 treatment were housed together and had negligible handling during the gestation.

#### 11 **Blood alcohol concentration quantification**

12 Blood alcohol concentration associated with our pre-implantation binge-like alcohol exposure  
13 paradigm was quantified over a 4h period. To avoid supplementary stress on experimental animals, a  
14 different subset of pregnant E2.5 females (n=12) was used for this experiment. Ethanol-exposed  
15 females (n=3) were euthanized at each time point (1, 2, 3 and 4h), blood was collected, samples were  
16 centrifuged to separate serum and plasma, and alcohol was quantified using the EnzyChrome Ethanol  
17 Assay kit (BioAssays Systems/Cedarlane) following manufacturer's recommendations (1:5 plasma  
18 dilution).

#### 19 **Morphological analysis**

20 At E10.5, pregnant females were euthanized, and embryos were collected and dissected for  
21 morphological evaluation using Leica stereo microscope. Using LasX software, measurements of the  
22 crown-rump length (top of the head to the end of the tail), occipital to nose length (occipital part of  
23 the head to the nasal process), height of the head (top of the head to the beginning of the torso) and

1 length of the midbrain (occipital part to the midbrain/forebrain limit) were done. Similarly,  
2 morphological defects (e.g., severe developmental delay or growth restriction, brain or head  
3 malformation, heart anomaly or any other unexpected feature) were evaluated (108-110). Three  
4 embryos (n=3) revealed more than 2 morphological defects and were placed in the category of their  
5 main defect (delayed n=2, brain malformation n=1). Embryos that hatched (Ctrl n= 23; EtOH n=21)  
6 from the yolk sac during dissection were excluded of both measurements and morphological analyses  
7 due to the possible deformation induced by the pressure on the embryo during the expulsion. The sex  
8 of each embryo was determined by qPCR using expression of *Ddx3*, on yolk sac DNA. Statistical  
9 analyses were done using GraphPad prism (version 8.4.3) for t-test with Welch correction and f-test  
10 for variance or R (version 3.5.0) for chi-square and proportional z-test.

### 11 **Histological analysis and immunostaining**

12 Following collection, whole E10.5 embryos were fixed in 4% paraformaldehyde (PFA), post-  
13 fixed in EtOH 70% for 48h and paraffin embedded (111). Whole embryos were sectioned at 5 $\mu$ M and  
14 corresponding sections were stained with hematoxylin and eosin (112) to determine gross  
15 morphology, or for Cleaved Caspase-3 (Cell Signaling #9579S) or Ki67 (Abcam # AB15580)  
16 following manufacturer's protocol and counterstained with hematoxylin. Imaging was done using  
17 Zeiss Zen Axioscan Slide Scanner system . Images processing and quantification were performed  
18 using ImageJ. Three similar sub regions of forebrain and midbrain (0.02mm<sup>2</sup> each) were quantified  
19 across all samples. Statistical analyses were done using GraphPad prism (version 8.4.3) for t-test with  
20 Welch correction.

### 21 **DNA extraction and Reduced Representation Bisulfite Sequencing**

22 Following morphological analyses, embryonic E10.5 forebrains were isolated, flash frozen  
23 and kept at -80°C. Genomic DNA was extracted from forebrains using the QIAamp DNA Micro kit  
24 (Qiagen #56304) following manufacturer's recommendations. Extracted DNA was quantified using

1 QuBit fluorimeter apparel with the Broad range DNA assay kit (ThermoFisher #Q32853). The sex of  
2 each DNA sample was again validated by *Ddx3* qPCR. DNA samples from forebrains with no  
3 apparent morphological defects were randomly selected, using 6 control embryos (3 males and 3  
4 females, from 3 different litters) and 16 ethanol-exposed embryos (8 males and 8 females, from 6  
5 different litters). EtOH-exposed and control embryo groups were similar in size and morphology (**Fig.**  
6 **S2**). Genomic DNA was used to produce rapid Reduced Representation Bisulfite Sequencing  
7 (rRRBS) libraries as previously described (27, 113-116). Briefly, 500ng of DNA was digested with  
8 *MspI* restriction enzyme, adapters were attached to DNA fragments followed by sodium bisulfite  
9 conversion and amplification/indexation of libraries. Libraries were quantified using QuBit  
10 fluorimeter apparel with the High Sensitivity DNA assay kit (ThermoFisher #Q32854). Quality  
11 control was assessed using BioAnalyzer and paired-end sequencing was done on Illumina HiSeq 2500  
12 at the Genome Québec core facility. We obtained between 19M and 41M raw reads for each sample  
13 (**Table S1**).

#### 14 **Bioinformatics analysis**

15 Data processing, alignment (mm10 genome) and methylation calls were performed using our  
16 established pipeline (27, 114-116) which includes tools such as Trim Galore (version 0.3.3) (117),  
17 BSMAP (version 2.90) (118) and R (version 3.5.0) (**Table S1**). Differentially methylated regions  
18 were obtained with MethylKit (version 1.8.1) (119) using the Benjamini-Hochberg false discovery  
19 rate (FDR) procedure. Fixed parameters were used, including 100bp stepwise tiling windows, a  
20 minimum of 2 CpGs per tile and a threshold of  $q < 0.01$ . DNA methylation level is calculated as the  
21 average methylation of all CpGs within a tile for all the samples within a condition (**Fig. 3**: minimum  
22 5 samples/condition,  $\geq 10\times$  sequencing depth; **Fig. 4-6** & **Fig. S6-S7**: minimum 3  
23 samples/condition/sex,  $\geq 10\times$  sequencing depth). The number of CpGs per tile and bisulfite conversion  
24 rate ( $>97\%$ ) were obtained using a custom Perl script.

1 Annotation of the analysed tiles was done using Homer (version 4.10.1) with mm10 reference  
2 genome. Gene ontology enrichment analysis was performed with Metascape (120) online tool using  
3 only differentially methylated tiles located in genic regions. Repeats and CpG islands coordinates  
4 were obtained from UCSC table browser databases (mm10 genome). CpG context tracks (CpG shores  
5 and CpG shelves) were built by adding up respectively 0-2kb and 2-4kb from the CpG islands  
6 coordinates as previously describes (114, 121).

7

### 8 **RNA extraction and expression analysis by quantitative PCR (qPCR)**

9 Quantitative gene expression analyses were performed as previously (122, 123). Briefly, embryonic  
10 E10.5 forebrains were isolated, flash frozen and kept at -80°C until RNA extraction. RNA was  
11 extracted using RNeasy Mini kit (Qiagen #74004) following manufacturer's recommendations.  
12 Extracted RNA was quantified using QuBit fluorimeter apparel with the High Sensitivity RNA assay  
13 kit (ThermoFisher #Q32852). 600ng of RNA was used for cDNA conversion using SuperScript IV  
14 Reverse Transcriptase (ThermoFisher #18090010). For each gene (primer sequence **Table S2**), qPCR  
15 reactions were performed in triplicate on 5ng of cDNA using SensiFAST SYBR No-ROX (Bioline  
16 #BIO-98005) on a LightCycler 96 (Roche Life Science). Gene expression analysis and normalization  
17 was done using the  $2^{-\Delta\Delta Ct}$  method using *Hprt1* and *Pgk1* as reference genes. Statistical analyses were  
18 done using GraphPad prism (version 8.4.3) for t-test with Welch correction.

19

20



## 1 **Figure Legends**

2 **Figure 1. Early pre-implantation alcohol exposure affects mouse embryonic development at**  
3 **mid-gestation. A)** Schematic description of binge alcohol exposure model during pre-implantation  
4 embryo development, and analyses performed at mid-gestation. Pregnant females were exposed to  
5 EtOH (2x 2.5g/kg EtOH) or Saline (Ctrl) (equivalent volume to ethanol) by subcutaneous injections  
6 (2h interval) to precisely target E2.5 stage embryos (~8-cell stage). E10.5 embryos were collected for  
7 morphological assessment; forebrain was isolated for genome-wide DNA methylation analyses. **B)**  
8 Quantification of blood alcohol concentration in pregnant females following EtOH exposure at E2.5.  
9 Red stars indicate the two EtOH injection time points. Peak level (284mg/dL) was observed at 3h  
10 post-exposure, with an average of 158.31 mg/dL over 4hrs. **C)** Number of E10.5 embryos per litter in  
11 Ctrl (n=16 litters; average 8.13 embryos/litter) and EtOH-exposed (n=22 litters; average 7.91  
12 embryos/litter). **D)** Male and female embryo sex ratios of litters presented in panel C), with number of  
13 embryos shown in bar graph. **E)** Embryonic (E10.5) measurements: crown-rump length, head height,  
14 occipital-nose length and brain sagittal length. Control embryos: (n=63, 8 litters), ethanol-exposed  
15 embryos (n=76, 11 litters). No significant difference of the means; t-test with Welch's correction, but  
16 higher variance in EtOH-exposed; F-test.

17

18 **Figure 2. Increased phenotypic alterations in developing embryos following early pre-**  
19 **implantation alcohol exposure. A)** Percentage of E10.5 embryos with phenotypic alterations (Ctrl:  
20 2%; n=2/108, EtOH-exposed: 19%; n=29/152, \*\*\*\*p<0.0001; chi-square test). **B)** Classification and  
21 proportion of phenotypic alterations observed in EtOH-exposed embryos. **C)** Examples of primary  
22 phenotypic alterations observed in EtOH-exposed embryos. Views from both side of the embryo and  
23 zoom on the head for control (i, vi, xi) and EtOH-exposed embryos with severe developmental delays  
24 (ii, vii, xii), brain malformations (iii, viii, xiii, iv, ix, xiv) and no apparent defects (v, x, xv). **D)**  
25 Number of embryos with alterations and number of litters with at least one affected embryo.  
26 \*\*\*p<0.001; chi-square test.

27

28 **Figure 3. Early pre-implantation alcohol exposure triggers DNA methylation alterations in**  
29 **developing embryonic forebrain.** Genome-wide CpG methylation analyses of E10.5 control (n=6)  
30 and ethanol-exposed (n=16) forebrains. **A)** Distribution of genomic tiles (100bp) (all-tiles;  
31 n=114 911) across ranges of CpG methylation levels in control and EtOH-exposed samples.  
32 \*\*\*\*p<0.0001, \*\*\*p<0.001, \*p<0.05; z-test proportion test. **B)** Heatmap showing CpG methylation  
33 levels for the top1% most variable tiles (n=1 200) between control and EtOH-exposed forebrains.  
34 Gray lines in heatmap have no associated methylation values because of lack of sufficient sequencing  
35 coverage in sample. **C)** Scatterplot representing the differentially methylated regions (DMRs)  
36 between control and EtOH-exposed forebrains (see methods section for details). Red dots represent  
37 the tiles with a methylation increase of at least 10% in EtOH-exposed compared to control forebrains  
38 (n=69); blue dots represent the tiles with a methylation decrease of at least 10% in EtOH-exposed  
39 compared to control forebrains (n=1 440); grey dots represent the tiles with changes less than 10% in  
40 EtOH-exposed compared to control forebrains (n=113 402). **D)** Proportion of DMRs associated with  
41 the changes of CpG methylation levels between control and EtOH-exposed E10.5 forebrains. **E)**  
42 Comparison of CpG methylation levels of specific DMRs-associated tiles in EtOH-exposed versus

1 control forebrains. Blue bar graph represents the comparison for decreased-methylation DMRs (n=1  
2 440); red bar graph represents comparison for the increased-methylation DMRs (n=69). **F)** Functional  
3 enrichment analysis showing top 10 enriched pathways for decreased- and increased-methylation  
4 DMRs located in genic regions (n=710 unique gene DMRs), based on Metascape analysis for  
5 pathways and p-value. The size of the dot represents the number of DMR-associated genes in a  
6 pathway, and gene ratio represents the number of DMR-associated genes with regards to the number  
7 of genes in a pathway. **G)** Examples of CpG methylation levels of individual samples for DMR-  
8 associated genes related to the top enriched pathways. Letters under gene name relate to the pathways  
9 in F). □ represents significant differences in CpG methylation levels of DMRs (e.g.,  $\pm > 10\%$   
10 methylation difference,  $q < 0.01$ ) between control and EtOH-exposed embryos (see methods section  
11 for details).

12

13 **Figure 4. Sex-related changes in embryonic forebrain DNA methylation mediated by early pre-**  
14 **implantation ethanol exposure. A)** Schematic design of sex-related genome-wide CpG methylation  
15 analysis in male (Ctrl n=3, EtOH n=8) and female (Ctrl n=3, EtOH n=8) E10.5 forebrain samples.  
16 Identification of all-tiles associated with either male samples (n=83 424), female samples (n=126  
17 857), male-female common samples (n=46 475), as well as male-specific (n=971), female-specific  
18 (n=133) and common (n=144) DMRs (see methods section for details). **B)** Distribution of genomic  
19 tiles (100bp) (common tiles; n=46 475) across ranges (10%) of CpG methylation in male and female  
20 control and EtOH-exposed samples. \*\*\*\*p<0.0001, \*\*p<0.01, \*p<0.05; z-test proportion test. **C)**  
21 Distribution of common DMRs (n=111) with increased or decreased CpG methylation in male (outer  
22 circle) and female (inner circle) samples. **D)** Proportion of common DMRs associated with the  
23 changes of CpG methylation levels between control and EtOH-exposed in male and female  
24 forebrains. **E)** Percentage of tiles associated with various genomic features: genomic annotation  
25 (left), repeat elements (middle) and CpG-rich context (right) in common all-tiles (n=46 475) and  
26 common DMRs (n=111). **F)** Examples of CpG methylation levels of individual samples of common  
27 DMRs in male and female samples. □ represents significant differences in CpG methylation levels of  
28 DMRs (e.g.,  $\pm > 10\%$  methylation difference,  $q < 0.01$ ) between control and EtOH-exposed embryos  
29 (see methods section for details).

30

31 **Figure 5. Early pre-implantation ethanol exposure induces sex-specific DNA methylation**  
32 **alterations in developing embryonic forebrain.** Identification of male and female sex-specific  
33 DMRs in ethanol-exposed E10.5 forebrains is described in Fig.4A. **A)** Manhattan plot showing  
34 differences of CpG methylation by chromosomal position for male-specific (n=971; left graph) and  
35 female-specific (n=133; right graph) DMRs. Red dots represent DMRs with increased-methylation in  
36 EtOH-exposed forebrains (n=31; right graph and n=30; left graph); blue dots represent DMRs with  
37 decreased methylation in EtOH-exposed forebrains (n=940; right graph and n=103; left graph); grey  
38 dots represent tiles with less than 10% methylation differences between EtOH-exposed and control  
39 forebrains (n=45 504; right graph and n=46 342; left graph). **B)** Proportion of sex-specific DMRs  
40 (upper graph; male n=971, lower graph; female n=133) associated with changes in CpG methylation  
41 levels between control and EtOH-exposed E10.5 forebrains. **C)** Percentage of sex-specific DMR-  
42 associated tiles (male n=971, female n=133) across various genomic features: genomic annotation  
43 (top), repeat elements (middle) and CpG-rich context (bottom). **D)** Percentage of CpG methylation

1 levels of male- and female-specific DMRs based on the distribution of CpG sites in CpG islands, CpG  
2 shores and CpG shelves. **E)** Functional enrichment analysis showing top enriched pathways for male-  
3 (top 10 pathways, n=508 unique gene DMRs) and female-specific DMRs (n=87 unique gene DMRs),  
4 based on Metascape analysis for pathways and p-value. The size of the dot represents the number of  
5 DMR-associated genes in pathways, and gene ratio represents the number of DMR-associated genes  
6 with regards to the number of genes in a pathway. **F)** Examples of CpG methylation levels of  
7 individual samples for sex-specific DMR-associated genes related to the top enriched pathways in E).  
8 Letters under gene name relate to the pathways in E). □ represents significant differences in CpG  
9 methylation levels of DMRs (e.g.,  $\pm > 10\%$  methylation difference,  $q < 0.01$ ) between control and  
10 EtOH-exposed embryos (see methods section for details).

11

12 **Figure 6. Early pre-implantation ethanol exposure leads to partial loss of DNA methylation**  
13 **maintenance across imprinting control regions. A-C)** Heatmaps representing CpG methylation  
14 levels for control versus EtOH-exposed samples in regions (100bp tiles) located within defined  
15 imprinting control regions. Examples of CpG methylation levels of individual samples in imprinting  
16 control regions associated tiles are shown. □ represents significant differences in CpG methylation  
17 levels of DMRs (e.g.,  $\pm > 10\%$  methylation difference,  $q < 0.01$ ) between control and EtOH-exposed  
18 embryos (see methods section for details). **A)** Imprinting control regions (n=28 tiles) analyzed  
19 (sufficient sequencing coverage) in both male and female samples (control vs EtOH-exposed). **B)**  
20 Imprinting control regions (n=13 tiles) analyzed only in males (lack of proper sequencing coverage in  
21 females). **C)** Imprinting control regions (n=36 tiles) analyzed only in females (lack of proper  
22 sequencing coverage in males).

23

24

25

26

27

28

29

1

## 2 DATA AVAILABILITY AND MATERIALS

3 The data from this study have been submitted to the Gene Expression Omnibus (GSE162765).

4 Reviewer link: <https://www.ncbi.nlm.nih.gov/geo/query/acc.cgi?acc=GSE162765>

5 **Token : exyxmucsxlilhwp**

6

## 7 REFERENCES

- 8 1. May PA, Baete A, Russo J, Elliott AJ, Blankenship J, Kalberg WO, et al. Prevalence and  
9 characteristics of fetal alcohol spectrum disorders. *Pediatrics*. 2014;134(5):855-66.
- 10 2. Welch-Carre E. The neurodevelopmental consequences of prenatal alcohol exposure. *Adv*  
11 *Neonatal Care*. 2005;5(4):217-29.
- 12 3. Cook JL, Green CR, Lilley CM, Anderson SM, Baldwin ME, Chudley AE, et al. Fetal alcohol  
13 spectrum disorder: a guideline for diagnosis across the lifespan. *Cmaj*. 2016;188(3):191-7.
- 14 4. Legault LM, Bertrand-Lehouillier V, McGraw S. Pre-implantation alcohol exposure and  
15 developmental programming of FASD: an epigenetic perspective. *Biochem Cell Biol*.  
16 2018;96(2):117-30.
- 17 5. Lange S, Probst C, Gmel G, Rehm J, Burd L, Popova S. Global Prevalence of Fetal Alcohol  
18 Spectrum Disorder Among Children and Youth: A Systematic Review and Meta-analysis. *JAMA*  
19 *Pediatr*. 2017;171(10):948-56.
- 20 6. Popova S, Lange S, Probst C, Gmel G, Rehm J. Estimation of national, regional, and global  
21 prevalence of alcohol use during pregnancy and fetal alcohol syndrome: a systematic review and  
22 meta-analysis. *Lancet Glob Health*. 2017;5(3):e290-e9.
- 23 7. Dwyer-Lindgren L, Flaxman AD, Ng M, Hansen GM, Murray CJ, Mokdad AH. Drinking  
24 Patterns in US Counties From 2002 to 2012. *Am J Public Health*. 2015;105(6):1120-7.
- 25 8. Gruzca RA, Norberg K, Bucholz KK, Bierut LJ. Correspondence between secular changes in  
26 alcohol dependence and age of drinking onset among women in the United States. *Alcohol Clin*  
27 *Exp Res*. 2008;32(8):1493-501.
- 28 9. Lim SS, Vos T, Flaxman AD, Danaei G, Shibuya K, Adair-Rohani H, et al. A comparative risk  
29 assessment of burden of disease and injury attributable to 67 risk factors and risk factor clusters  
30 in 21 regions, 1990-2010: a systematic analysis for the Global Burden of Disease Study 2010.  
31 *Lancet*. 2012;380(9859):2224-60.
- 32 10. Popova S, Lange S, Probst C, Parunashvili N, Rehm J. Prevalence of alcohol consumption during  
33 pregnancy and Fetal Alcohol Spectrum Disorders among the general and Aboriginal populations  
34 in Canada and the United States. *Eur J Med Genet*. 2016.
- 35 11. Popova S, Lange S, Probst C, Shield K, Kraicer-Melamed H, Ferreira-Borges C, et al. Actual and  
36 predicted prevalence of alcohol consumption during pregnancy in the WHO African Region.  
37 *Trop Med Int Health*. 2016;21(10):1209-39.
- 38 12. Tan CH, Denny CH, Cheal NE, Sniezek JE, Kanny D. Alcohol use and binge drinking among  
39 women of childbearing age - United States, 2011-2013. *MMWR Morb Mortal Wkly Rep*.  
40 2015;64(37):1042-6.
- 41 13. Thomas G. Levels and patterns of alcohol use in Canada. Alcohol Price Policy Series. Report 1.  
42 Ottawa, ON: Canadian Centre on Substance Abuse.  
43 2012;[http://www.ccsa.ca/Resource%20Library/CCSA-Patterns-Alcohol-Use-Policy-Canada-](http://www.ccsa.ca/Resource%20Library/CCSA-Patterns-Alcohol-Use-Policy-Canada-2012-en.pdf)  
44 [2012-en.pdf](http://www.ccsa.ca/Resource%20Library/CCSA-Patterns-Alcohol-Use-Policy-Canada-2012-en.pdf).

- 1 14. Wilsnack SC, Wilsnack RW, Kantor LW. Focus on: women and the costs of alcohol use. *Alcohol*  
2 *Res.* 2013;35(2):219-28.
- 3 15. Sedgh G, Singh S, Hussain R. Intended and unintended pregnancies worldwide in 2012 and  
4 recent trends. *Stud Fam Plann.* 2014;45(3):301-14.
- 5 16. Öztürk NC, Resendiz M, Öztürk H, Zhou FC. DNA Methylation program in normal and alcohol-  
6 induced thinning cortex. *Alcohol.* 2017;60:135-47.
- 7 17. Garro AJ, McBeth DL, Lima V, Lieber CS. Ethanol consumption inhibits fetal DNA methylation  
8 in mice: implications for the fetal alcohol syndrome. *Alcohol Clin Exp Res.* 1991;15(3):395-8.
- 9 18. Chater-Diehl EJ, Laufer BI, Castellani CA, Alberry BL, Singh SM. Alteration of Gene  
10 Expression, DNA Methylation, and Histone Methylation in Free Radical Scavenging Networks in  
11 Adult Mouse Hippocampus following Fetal Alcohol Exposure. *PLoS One.* 2016;11(5):e0154836.
- 12 19. Laufer BI, Kapalanga J, Castellani CA, Diehl EJ, Yan L, Singh SM. Associative DNA  
13 methylation changes in children with prenatal alcohol exposure. *Epigenomics.* 2015;7(8):1259-  
14 74.
- 15 20. McGraw S, Oakes CC, Martel J, Cirio MC, de Zeeuw P, Mak W, et al. Loss of DNMT1o disrupts  
16 imprinted X chromosome inactivation and accentuates placental defects in females. *PLoS Genet.*  
17 2013;9(11):e1003873.
- 18 21. Breton-Larrivéé M, Elder E, McGraw S. DNA methylation, environmental exposures and early  
19 embryo development. *Anim Reprod.* 2019;16(3):465-74.
- 20 22. McGraw S, Trasler IM. Oocyte epigenetics and the risks for imprinting disorders associated with  
21 assisted reproduction. *Biology and Pathology of the Oocyte: Role in Fertility, Medicine and*  
22 *Nuclear Reprograming.* 2013:384.
- 23 23. Zhu P, Guo H, Ren Y, Hou Y, Dong J, Li R, et al. Single-cell DNA methylome sequencing of  
24 human preimplantation embryos. *Nat Genet.* 2018;50(1):12-9.
- 25 24. Farthing CR, Ficz G, Ng RK, Chan CF, Andrews S, Dean W, et al. Global mapping of DNA  
26 methylation in mouse promoters reveals epigenetic reprogramming of pluripotency genes. *PLoS*  
27 *Genet.* 2008;4(6):e1000116.
- 28 25. Oswald J, Engemann S, Lane N, Mayer W, Olek A, Fundele R, et al. Active demethylation of the  
29 paternal genome in the mouse zygote. *Curr Biol.* 2000;10(8):475-8.
- 30 26. Peat JR, Dean W, Clark SJ, Krueger F, Smallwood SA, Ficz G, et al. Genome-wide bisulfite  
31 sequencing in zygotes identifies demethylation targets and maps the contribution of TET3  
32 oxidation. *Cell Rep.* 2014;9(6):1990-2000.
- 33 27. McGraw S, Zhang JX, Farag M, Chan D, Caron M, Konermann C, et al. Transient DNMT1  
34 suppression reveals hidden heritable marks in the genome. *Nucleic Acids Res.* 2015;43(3):1485-  
35 97.
- 36 28. Reik W, Dean W, Walter J. Epigenetic reprogramming in mammalian development. *Science.*  
37 2001;293(5532):1089-93.
- 38 29. Messerschmidt DM, Knowles BB, Solter D. DNA methylation dynamics during epigenetic  
39 reprogramming in the germline and preimplantation embryos. *Genes Dev.* 2014;28(8):812-28.
- 40 30. Kazakevych J, Sayols S, Messner B, Krienke C, Soshnikova N. Dynamic changes in chromatin  
41 states during specification and differentiation of adult intestinal stem cells. *Nucleic Acids Res.*  
42 2017;45(10):5770-84.
- 43 31. Liu J, Banerjee A, Herring CA, Attalla J, Hu R, Xu Y, et al. Neurog3-Independent Methylation Is  
44 the Earliest Detectable Mark Distinguishing Pancreatic Progenitor Identity. *Dev Cell.*  
45 2019;48(1):49-63.e7.
- 46 32. Sanosaka T, Imamura T, Hamazaki N, Chai M, Igarashi K, Ideta-Otsuka M, et al. DNA  
47 Methylome Analysis Identifies Transcription Factor-Based Epigenomic Signatures of  
48 Multilineage Competence in Neural Stem/Progenitor Cells. *Cell Rep.* 2017;20(12):2992-3003.

- 1 33. Zhang Y, Xiang Y, Yin Q, Du Z, Peng X, Wang Q, et al. Dynamic epigenomic landscapes during  
2 early lineage specification in mouse embryos. *Nat Genet.* 2018;50(1):96-105.
- 3 34. Pérez-Cerezales S, Ramos-Ibeas P, Rizos D, Lonergan P, Bermejo-Alvarez P, Gutiérrez-Adán A.  
4 Early sex-dependent differences in response to environmental stress. *Reproduction.*  
5 2018;155(1):R39-r51.
- 6 35. Bermejo-Alvarez P, Rizos D, Lonergan P, Gutierrez-Adan A. Transcriptional sexual dimorphism  
7 during preimplantation embryo development and its consequences for developmental competence  
8 and adult health and disease. *Reproduction.* 2011;141(5):563-70.
- 9 36. Donjacour A, Liu X, Lin W, Simbulan R, Rinaudo PF. In vitro fertilization affects growth and  
10 glucose metabolism in a sex-specific manner in an outbred mouse model. *Biol Reprod.*  
11 2014;90(4):80.
- 12 37. Lowe R, Gemma C, Rakyan VK, Holland ML. Sexually dimorphic gene expression emerges with  
13 embryonic genome activation and is dynamic throughout development. *BMC Genomics.*  
14 2015;16(1):295.
- 15 38. Miozzo F, Arnould H, de Thonel A, Schang AL, Sabéran-Djoneidi D, Baudry A, et al. Alcohol  
16 exposure promotes DNA methyltransferase DNMT3A upregulation through reactive oxygen  
17 species-dependent mechanisms. *Cell Stress Chaperones.* 2018;23(1):115-26.
- 18 39. Wu D, Cederbaum AI. Alcohol, oxidative stress, and free radical damage. *Alcohol Res Health.*  
19 2003;27(4):277-84.
- 20 40. Mandal C, Halder D, Jung KH, Chai YG. Gestational Alcohol Exposure Altered DNA  
21 Methylation Status in the Developing Fetus. *Int J Mol Sci.* 2017;18(7).
- 22 41. Haycock PC, Ramsay M. Exposure of mouse embryos to ethanol during preimplantation  
23 development: effect on DNA methylation in the h19 imprinting control region. *Biol Reprod.*  
24 2009;81(4):618-27.
- 25 42. Patten AR, Fontaine CJ, Christie BR. A comparison of the different animal models of fetal  
26 alcohol spectrum disorders and their use in studying complex behaviors. *Front Pediatr.*  
27 2014;2:93.
- 28 43. Perkins A, Lehmann C, Lawrence RC, Kelly SJ. Alcohol exposure during development: Impact  
29 on the epigenome. *Int J Dev Neurosci.* 2013;31(6):391-7.
- 30 44. Boschen KE, Criss KJ, Palamarchouk V, Roth TL, Klintsova AY. Effects of developmental  
31 alcohol exposure vs. intubation stress on BDNF and TrkB expression in the hippocampus and  
32 frontal cortex of neonatal rats. *Int J Dev Neurosci.* 2015;43:16-24.
- 33 45. Mantha K, Laufer BI, Singh SM. Molecular changes during neurodevelopment following second-  
34 trimester binge ethanol exposure in a mouse model of fetal alcohol spectrum disorder: from  
35 immediate effects to long-term adaptation. *Dev Neurosci.* 2014;36(1):29-43.
- 36 46. Abel E. Effects of ethanol on pregnant rats and their offspring. *Psychopharmacology.*  
37 1978;57(1):5-11.
- 38 47. Sulik KK, Johnston MC, Webb MA. Fetal alcohol syndrome: embryogenesis in a mouse model.  
39 *Science.* 1981;214(4523):936-8.
- 40 48. El Shawa H, Abbott CW, 3rd, Huffman KJ. Prenatal ethanol exposure disrupts intraneocortical  
41 circuitry, cortical gene expression, and behavior in a mouse model of FASD. *J Neurosci.*  
42 2013;33(48):18893-905.
- 43 49. Ghimire SR, Dhungel S, Rai D, Jha CB, Saxena AK, Maskey D. Effect of prenatal exposure of  
44 alcohol in the morphology of developing rat embryo. *Nepal Med Coll J.* 2008;10(1):38-40.
- 45 50. Le TN, Zhou QP, Cobos I, Zhang S, Zagozewski J, Japoni S, et al. GABAergic Interneuron  
46 Differentiation in the Basal Forebrain Is Mediated through Direct Regulation of Glutamic Acid  
47 Decarboxylase Isoforms by Dlx Homeobox Transcription Factors. *J Neurosci.* 2017;37(36):8816-  
48 29.

- 1 51. Lim L, Mi D, Llorca A, Marín O. Development and Functional Diversification of Cortical  
2 Interneurons. *Neuron*. 2018;100(2):294-313.
- 3 52. Sussel L, Marin O, Kimura S, Rubenstein JL. Loss of Nkx2.1 homeobox gene function results in  
4 a ventral to dorsal molecular respecification within the basal telencephalon: evidence for a  
5 transformation of the pallidum into the striatum. *Development*. 1999;126(15):3359-70.
- 6 53. Nóbrega-Pereira S, Kessaris N, Du T, Kimura S, Anderson SA, Marín O. Postmitotic Nkx2-1  
7 controls the migration of telencephalic interneurons by direct repression of guidance receptors.  
8 *Neuron*. 2008;59(5):733-45.
- 9 54. Alzu'bi A, Lindsay S, Kerwin J, Looi SJ, Khalil F, Clowry GJ. Distinct cortical and sub-cortical  
10 neurogenic domains for GABAergic interneuron precursor transcription factors NKX2.1, OLIG2  
11 and COUP-TFII in early fetal human telencephalon. *Brain Structure and Function*.  
12 2017;222(5):2309-28.
- 13 55. Kitamura K, Yanazawa M, Sugiyama N, Miura H, Iizuka-Kogo A, Kusaka M, et al. Mutation of  
14 ARX causes abnormal development of forebrain and testes in mice and X-linked lissencephaly  
15 with abnormal genitalia in humans. *Nat Genet*. 2002;32(3):359-69.
- 16 56. Colasante G, Collombat P, Raimondi V, Bonanomi D, Ferrai C, Maira M, et al. Arx is a direct  
17 target of Dlx2 and thereby contributes to the tangential migration of GABAergic interneurons. *J*  
18 *Neurosci*. 2008;28(42):10674-86.
- 19 57. Lunde ER, Washburn SE, Golding MC, Bake S, Miranda RC, Ramadoss J. Alcohol-Induced  
20 Developmental Origins of Adult-Onset Diseases. *Alcohol Clin Exp Res*. 2016;40(7):1403-14.
- 21 58. Chang RC, Skiles WM, Chronister SS, Wang H, Sutton GI, Bedi YS, et al. DNA methylation-  
22 independent growth restriction and altered developmental programming in a mouse model of  
23 preconception male alcohol exposure. *Epigenetics*. 2017;12(10):841-53.
- 24 59. Laufer BI, Chater-Diehl EJ, Kapalanga J, Singh SM. Long-term alterations to DNA methylation  
25 as a biomarker of prenatal alcohol exposure: From mouse models to human children with fetal  
26 alcohol spectrum disorders. *Alcohol*. 2017;60:67-75.
- 27 60. Lussier AA, Morin AM, MacIsaac JL, Salmon J, Weinberg J, Reynolds JN, et al. DNA  
28 methylation as a predictor of fetal alcohol spectrum disorder. *Clin Epigenetics*. 2018;10:5.
- 29 61. Portales-Casamar E, Lussier AA, Jones MJ, MacIsaac JL, Edgar RD, Mah SM, et al. DNA  
30 methylation signature of human fetal alcohol spectrum disorder. *Epigenetics Chromatin*.  
31 2016;9:25.
- 32 62. Petrelli B, Weinberg J, Hicks GG. Effects of prenatal alcohol exposure (PAE): insights into  
33 FASD using mouse models of PAE. *Biochem Cell Biol*. 2018;96(2):131-47.
- 34 63. Liyanage VR, Zachariah RM, Davie JR, Rastegar M. Ethanol deregulates Mecp2/MeCP2 in  
35 differentiating neural stem cells via interplay between 5-methylcytosine and 5-  
36 hydroxymethylcytosine at the Mecp2 regulatory elements. *Exp Neurol*. 2015;265:102-17.
- 37 64. Wiebold JL, Becker WC. In-vivo and in-vitro effects of ethanol on mouse preimplantation  
38 embryos. *J Reprod Fertil*. 1987;80(1):49-57.
- 39 65. Abel EL. Prenatal effects of alcohol on growth: a brief overview. *Fed Proc*. 1985;44(7):2318-22.
- 40 66. Padmanabhan R, Hameed MS. Effects of acute doses of ethanol administered at pre-implantation  
41 stages on fetal development in the mouse. *Drug Alcohol Depend*. 1988;22(1-2):91-100.
- 42 67. Sandor S, Gârban Z, Checiu M, Daradics L. The presence of ethanol in the oviductal and uterine  
43 luminal fluids of alcoholized rats. *Morphol Embryol (Bucur)*. 1981;27(4):303-9.
- 44 68. Pagé-Larivière F, Campagna C, Sirard MA. Mechanisms Involved in Porcine Early Embryo  
45 Survival following Ethanol Exposure. *Toxicol Sci*. 2017;156(1):289-99.
- 46 69. Mustapha TA, Chang RC, Garcia-Rhodes D, Pendleton D, Johnson NM, Golding MC.  
47 Gestational exposure to particulate air pollution exacerbates the growth phenotypes induced by

- 1 preconception paternal alcohol use: a multiplex model of exposure. *Environ Epigenet.*  
2 2020;6(1):dvaa011.
- 3 70. Chang RC, Thomas KN, Bedi YS, Golding MC. Programmed increases in LXR $\alpha$  induced by  
4 paternal alcohol use enhance offspring metabolic adaptation to high-fat diet induced obesity. *Mol*  
5 *Metab.* 2019;30:161-72.
- 6 71. Bedi Y, Chang RC, Gibbs R, Clement TM, Golding MC. Alterations in sperm-inherited  
7 noncoding RNAs associate with late-term fetal growth restriction induced by preconception  
8 paternal alcohol use. *Reprod Toxicol.* 2019;87:11-20.
- 9 72. Chang RC, Wang H, Bedi Y, Golding MC. Preconception paternal alcohol exposure exerts sex-  
10 specific effects on offspring growth and long-term metabolic programming. *Epigenetics*  
11 *Chromatin.* 2019;12(1):9.
- 12 73. Cirio MC, Martel J, Mann M, Toppings M, Bartolomei M, Trasler J, et al. DNA  
13 methyltransferase 1o functions during preimplantation development to preclude a profound level  
14 of epigenetic variation. *Dev Biol.* 2008;324(1):139-50.
- 15 74. Toppings M, Castro C, Mills PH, Reinhart B, Schatten G, Ahrens ET, et al. Profound phenotypic  
16 variation among mice deficient in the maintenance of genomic imprints. *Hum Reprod.*  
17 2008;23(4):807-18.
- 18 75. Cirio MC, Ratnam S, Ding F, Reinhart B, Navara C, Chaillet JR. Preimplantation expression of  
19 the somatic form of Dnmt1 suggests a role in the inheritance of genomic imprints. *BMC Dev*  
20 *Biol.* 2008;8:9.
- 21 76. Dasmahapatra AK, Khan IA. DNA methyltransferase expressions in Japanese rice fish (*Oryzias*  
22 *latipes*) embryogenesis is developmentally regulated and modulated by ethanol and 5-azacytidine.  
23 *Comp Biochem Physiol C Toxicol Pharmacol.* 2015;176-177:1-9.
- 24 77. Kindsfather AJ, Czekalski MA, Pressimone CA, Erisman MP, Mann MRW. Perturbations in  
25 imprinted methylation from assisted reproductive technologies but not advanced maternal age in  
26 mouse preimplantation embryos. *Clin Epigenetics.* 2019;11(1):162.
- 27 78. Market-Velker BA, Zhang L, Magri LS, Bonvissuto AC, Mann MR. Dual effects of  
28 superovulation: loss of maternal and paternal imprinted methylation in a dose-dependent manner.  
29 *Hum Mol Genet.* 2010;19(1):36-51.
- 30 79. Ho-Shing O, Dulac C. Influences of genomic imprinting on brain function and behavior. *Current*  
31 *opinion in behavioral sciences.* 2019;25:66-76.
- 32 80. Seisenberger S, Peat JR, Hore TA, Santos F, Dean W, Reik W. Reprogramming DNA  
33 methylation in the mammalian life cycle: building and breaking epigenetic barriers. *Philos Trans*  
34 *R Soc Lond B Biol Sci.* 2013;368(1609):20110330.
- 35 81. Whidden L, Martel J, Rahimi S, Chaillet JR, Chan D, Trasler JM. Compromised oocyte quality  
36 and assisted reproduction contribute to sex-specific effects on offspring outcomes and epigenetic  
37 patterning. *Hum Mol Genet.* 2016;25(21):4649-60.
- 38 82. Tan K, Wang Z, Zhang Z, An L, Tian J. IVF affects embryonic development in a sex-biased  
39 manner in mice. *Reproduction.* 2016;151(4):443-53.
- 40 83. Skuse DH. Imprinting, the X-chromosome, and the male brain: explaining sex differences in the  
41 liability to autism. *Pediatric research.* 2000;47(1):9-.
- 42 84. Hart R, Norman RJ. The longer-term health outcomes for children born as a result of IVF  
43 treatment: Part I--General health outcomes. *Hum Reprod Update.* 2013;19(3):232-43.
- 44 85. Källén B, Finnström O, Lindam A, Nilsson E, Nygren KG, Olausson PO. Cancer risk in children  
45 and young adults conceived by in vitro fertilization. *Pediatrics.* 2010;126(2):270-6.
- 46 86. Kenton JA, Castillo VK, Kehrer PE, Brigman JL. Moderate Prenatal Alcohol Exposure Impairs  
47 Visual-Spatial Discrimination in a Sex-Specific Manner: Effects of Testing Order and Difficulty  
48 on Learning Performance. *Alcohol Clin Exp Res.* 2020.



- 1 87. de Ávila MAP, Gonçalves RM, Nascimento ECC, Cabral LDM, Vilela FC, Giusti-Paiva A.  
2 Prenatal exposure to alcohol impairs social play behavior in adolescent male mice.  
3 *Neurotoxicology*. 2020;79:142-9.
- 4 88. Petropoulos S, Edsgård D, Reinius B, Deng Q, Panula SP, Codeluppi S, et al. Single-Cell RNA-  
5 Seq Reveals Lineage and X Chromosome Dynamics in Human Preimplantation Embryos. *Cell*.  
6 2016;165(4):1012-26.
- 7 89. Bermejo-Alvarez P, Rizos D, Rath D, Lonergan P, Gutierrez-Adan A. Epigenetic differences  
8 between male and female bovine blastocysts produced in vitro. *Physiol Genomics*.  
9 2008;32(2):264-72.
- 10 90. Bermejo-Alvarez P, Rizos D, Rath D, Lonergan P, Gutierrez-Adan A. Sex determines the  
11 expression level of one third of the actively expressed genes in bovine blastocysts. *Proc Natl*  
12 *Acad Sci U S A*. 2010;107(8):3394-9.
- 13 91. Gebert C, Wrenzycki C, Herrmann D, Gröger D, Thiel J, Reinhardt R, et al. DNA methylation in  
14 the IGF2 intragenic DMR is re-established in a sex-specific manner in bovine blastocysts after  
15 somatic cloning. *Genomics*. 2009;94(1):63-9.
- 16 92. Terasaki LS, Gomez J, Schwarz JM. An examination of sex differences in the effects of early-life  
17 opiate and alcohol exposure. *Philos Trans R Soc Lond B Biol Sci*. 2016;371(1688):20150123.
- 18 93. Hernández-Miranda LR, Parnavelas JG, Chiara F. Molecules and mechanisms involved in the  
19 generation and migration of cortical interneurons. *ASN Neuro*. 2010;2(2):e00031.
- 20 94. Yun K, Fischman S, Johnson J, Hrabe de Angelis M, Weinmaster G, Rubenstein JL. Modulation  
21 of the notch signaling by Mash1 and Dlx1/2 regulates sequential specification and differentiation  
22 of progenitor cell types in the subcortical telencephalon. *Development*. 2002;129(21):5029-40.
- 23 95. Anderson SA, Eisenstat DD, Shi L, Rubenstein JL. Interneuron migration from basal forebrain to  
24 neocortex: dependence on Dlx genes. *Science*. 1997;278(5337):474-6.
- 25 96. Cobos I, Borello U, Rubenstein JL. Dlx transcription factors promote migration through  
26 repression of axon and dendrite growth. *Neuron*. 2007;54(6):873-88.
- 27 97. Friocourt G, Parnavelas JG. Identification of Arx targets unveils new candidates for controlling  
28 cortical interneuron migration and differentiation. *Front Cell Neurosci*. 2011;5:28.
- 29 98. Bird CW, Taylor DH, Pinkowski NJ, Chavez GJ, Valenzuela CF. Long-term Reductions in the  
30 Population of GABAergic Interneurons in the Mouse Hippocampus following Developmental  
31 Ethanol Exposure. *Neuroscience*. 2018;383:60-73.
- 32 99. Cunningham LA, Newville J, Li L, Tapia P, Allan AM, Valenzuela CF. Prenatal Alcohol  
33 Exposure Leads to Enhanced Serine 9 Phosphorylation of Glycogen Synthase Kinase-3 $\beta$  (GSK-  
34 3 $\beta$ ) in the Hippocampal Dentate Gyrus of Adult Mouse. *Alcohol Clin Exp Res*.  
35 2017;41(11):1907-16.
- 36 100. Larsen ZH, Chander P, Joyner JA, Floruta CM, Demeter TL, Weick JP. Effects of Ethanol on  
37 Cellular Composition and Network Excitability of Human Pluripotent Stem Cell-Derived  
38 Neurons. *Alcohol Clin Exp Res*. 2016;40(11):2339-50.
- 39 101. Cuzon VC, Yeh PW, Yanagawa Y, Obata K, Yeh HH. Ethanol consumption during early  
40 pregnancy alters the disposition of tangentially migrating GABAergic interneurons in the fetal  
41 cortex. *J Neurosci*. 2008;28(8):1854-64.
- 42 102. Skorput AG, Lee SM, Yeh PW, Yeh HH. The NKCC1 antagonist bumetanide mitigates  
43 interneuronopathy associated with ethanol exposure in utero. *Elife*. 2019;8.
- 44 103. Paterno R, Casalia M, Baraban SC. Interneuron deficits in neurodevelopmental disorders:  
45 Implications for disease pathology and interneuron-based therapies. *Eur J Paediatr Neurol*.  
46 2020;24:81-8.
- 47 104. Rossignol E. Genetics and function of neocortical GABAergic interneurons in  
48 neurodevelopmental disorders. *Neural Plast*. 2011;2011:649325.

- 1 105.Skorput AG, Gupta VP, Yeh PW, Yeh HH. Persistent Interneuronopathy in the Prefrontal Cortex  
2 of Young Adult Offspring Exposed to Ethanol In Utero. *J Neurosci*. 2015;35(31):10977-88.
- 3 106.Kleiber ML, Mantha K, Stringer RL, Singh SM. Neurodevelopmental alcohol exposure elicits  
4 long-term changes to gene expression that alter distinct molecular pathways dependent on timing  
5 of exposure. *J Neurodev Disord*. 2013;5(1):6.
- 6 107.Burgess DJ, Moritz KM. Prenatal alcohol exposure and developmental programming of mental  
7 illness. *Journal of developmental origins of health and disease*. 2020;11(3):211-21.
- 8 108.Christensen KE, Hou W, Bahous RH, Deng L, Malysheva OV, Arning E, et al. Moderate folic  
9 acid supplementation and MTHFD1-synthetase deficiency in mice, a model for the R653Q  
10 variant, result in embryonic defects and abnormal placental development. *Am J Clin Nutr*.  
11 2016;104(5):1459-69.
- 12 109.Christensen KE, Deng L, Leung KY, Arning E, Bottiglieri T, Malysheva OV, et al. A novel  
13 mouse model for genetic variation in 10-formyltetrahydrofolate synthetase exhibits disturbed  
14 purine synthesis with impacts on pregnancy and embryonic development. *Hum Mol Genet*.  
15 2013;22(18):3705-19.
- 16 110.Theiler K. The house mouse: atlas of embryonic development: Springer Science & Business  
17 Media; 2013.
- 18 111.Li L, Jayabal S, Ghorbani M, Legault LM, McGraw S, Watt AJ, et al. ATAT1 regulates forebrain  
19 development and stress-induced tubulin hyperacetylation. *Cell Mol Life Sci*. 2019;76(18):3621-  
20 40.
- 21 112.Shaffer B, McGraw S, Xiao SC, Chan D, Trasler J, Chaillet JR. The DNMT1 intrinsically  
22 disordered domain regulates genomic methylation during development. *Genetics*.  
23 2015;199(2):533-41.
- 24 113.Legault L-M, Chan D, McGraw S. Rapid multiplexed reduced representation bisulfite sequencing  
25 library prep (rRRBS). *Bio-Protocol*. 2019;9:4.
- 26 114.Legault LM, Doiron K, Lemieux A, Caron M, Chan D, Lopes FL, et al. Developmental genome-  
27 wide DNA methylation asymmetry between mouse placenta and embryo. *Epigenetics*.  
28 2020;15(8):800-15.
- 29 115.Pierre WC, Legault LM, Londono I, McGraw S, Lodygensky GA. Alteration of the brain  
30 methylation landscape following postnatal inflammatory injury in rat pups. *Faseb j*.  
31 2020;34(1):432-45.
- 32 116.Piché J, Gosset N, Legault LM, Pacis A, Oneglia A, Caron M, et al. Molecular Signature of  
33 CAID Syndrome: Noncanonical Roles of SGO1 in Regulation of TGF- $\beta$  Signaling and  
34 Epigenomics. *Cell Mol Gastroenterol Hepatol*. 2019;7(2):411-31.
- 35 117.Krueger F. Trim Galore: a wrapper tool around Cutadapt and FastQC to consistently apply  
36 quality and adapter trimming to FastQ files, with some extra functionality for MspI-digested  
37 RRBS-type (Reduced Representation Bisulfite-Seq) libraries. URL [http://www](http://www.bioinformatics.babraham.ac.uk/projects/trim_galore/)  
38 [bioinformatics](http://www.bioinformatics.babraham.ac.uk/projects/trim_galore/)  
39 [babraham.ac.uk/projects/trim\\_galore/](http://www.bioinformatics.babraham.ac.uk/projects/trim_galore/)(Date of access: 28/04/2016). 2012.
- 40 118.Xi Y, Li W. BSMAP: whole genome bisulfite sequence MAPPING program. *BMC*  
41 *Bioinformatics*. 2009;10:232.
- 42 119.Akalin A, Kormaksson M, Li S, Garrett-Bakelman FE, Figueroa ME, Melnick A, et al.  
43 methylKit: a comprehensive R package for the analysis of genome-wide DNA methylation  
44 profiles. *Genome Biol*. 2012;13(10):R87.
- 45 120.Zhou Y, Zhou B, Pache L, Chang M, Khodabakhshi AH, Tanaseichuk O, et al. Metascape  
46 provides a biologist-oriented resource for the analysis of systems-level datasets. *Nat Commun*.  
47 2019;10(1):1523.
- 48 121.Bibikova M, Barnes B, Tsan C, Ho V, Klotzle B, Le JM, et al. High density DNA methylation  
array with single CpG site resolution. *Genomics*. 2011;98(4):288-95.

- 1 122.Da Costa EM, Armaos G, McInnes G, Beaudry A, Moquin-Beaudry G, Bertrand-Lehouillier V,  
2 et al. Heart failure drug proscillaridin A targets MYC overexpressing leukemia through global  
3 loss of lysine acetylation. *J Exp Clin Cancer Res.* 2019;38(1):251.  
4 123.McGraw S, Vigneault C, Sirard MA. Temporal expression of factors involved in chromatin  
5 remodeling and in gene regulation during early bovine in vitro embryo development.  
6 *Reproduction.* 2007;133(3):597-608.

7

8

## 9 **ACKNOWLEDGMENTS**

10 We thank the McGraw lab for critical comments and suggestions, as well as Elizabeth Maurice-Elder  
11 for editing.

12

## 13 **FUNDING**

14 This work was supported by a research grant to SM from the Sickkids Foundation and Fonds de  
15 Recherche du Québec en Santé (FRQS). LML is supported by Canadian Institutes of Health Research  
16 (CIHR) scholarship. MBL and KD are supported by FRQS scholarship / fellowship. ALA is  
17 supported by Université de Montréal and Réseau Québécois en Reproduction (RQR) scholarships. AL  
18 is supported by Université de Montréal and Centre de Recherche en Reproduction et Fertilité (CRRF)  
19 scholarships. SM is supported by FRQS – Junior 2 salary award.

20

## 21 **AUTHOR INFORMATION**

### 22 **Affiliations**

23 CHU Sainte-Justine Research Center, 3175 Chemin de la Côte-Sainte-Catherine, Montréal, QC H3T  
24 1C5, Canada

25 Lisa-Marie Legault, Karine Doiron, Mélanie Breton Larrivée, Alexandra Langford-Avelar, Anthony  
26 Lemieux, Maxime Caron, Daniel Sinnott, Serge McGraw

27 Department of Biochemistry and Molecular Medicine, Université de Montréal, 2900 Boulevard  
28 Edouard-Montpetit, Montréal, QC H3T 1J4, Canada.

29 Lisa-Marie Legault, Mélanie Breton Larrivée, Alexandra Langford-Avelar, Anthony Lemieux, Serge  
30 McGraw

31 McGill University Health Centre Glen Site, 1001 Boulevard Décarie, Montréal, QC H4A 3J1,  
32 Canada.

33 Loydie Jerome-Majewska

34 Department of Pediatrics, McGill University, 1001 Boulevard Décarie, Montréal, QC H4A 3J1,  
35 Canada.

36 Loydie Jerome-Majewska

1 Department of Pediatrics, Université de Montréal, 2900 Boulevard Edouard-Montpetit, Montréal, QC  
2 H3T 1J4, Canada.

3 Daniel Sinnett

4 Department of Obstetrics and Gynecology, Université de Montréal, 2900 Boulevard Edouard-  
5 Montpetit, Montréal, QC H3T 1J4, Canada.

6 Serge McGraw

7

## 8 **Contributions**

9 LML and SM conceptualized the study. LML and MBL contributed in data acquisition. LML, KD,  
10 ALA, AL, MC, LJM and DS participated in data analysis. LML, KD and SM wrote the manuscript.  
11 All authors read and approved the final manuscript.

12

## 13 **Corresponding author**

14 Correspondence to Serge McGraw

15

## 16 **ETHICS DECLARATION**

### 17 **Consent for publication**

18 Not applicable

19

### 20 **Competing interests**

21 No competing interests declared.

**A**

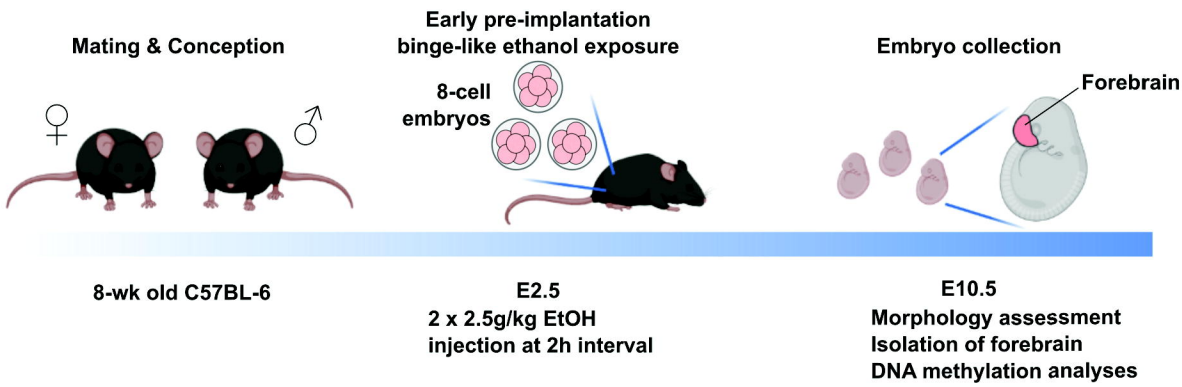

**B**

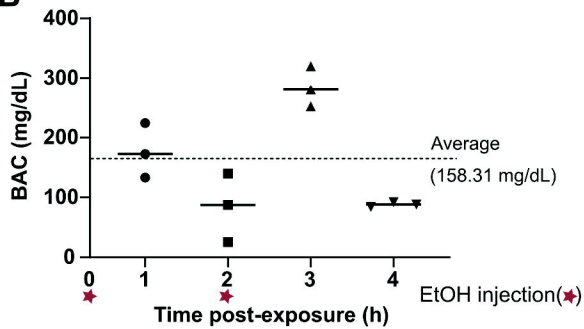

**C**

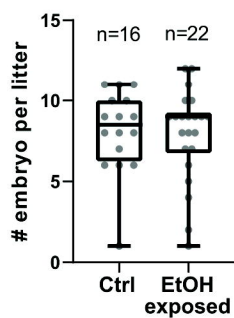

**D**

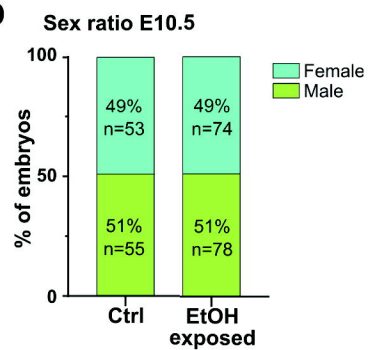

**E**

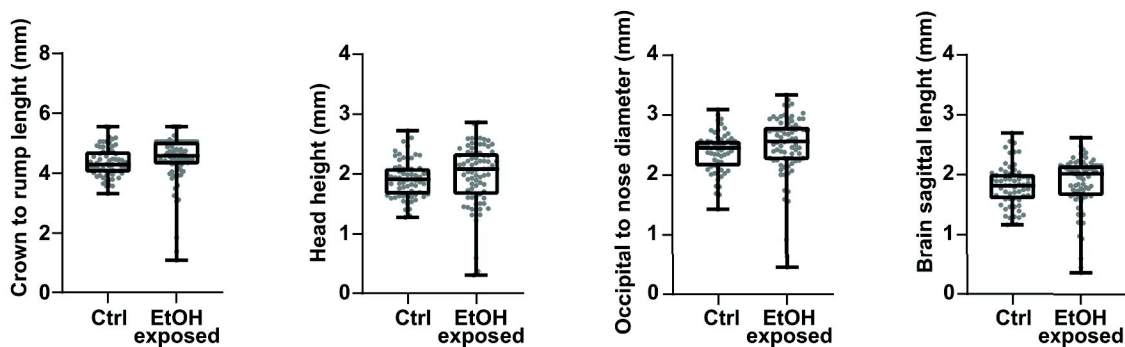

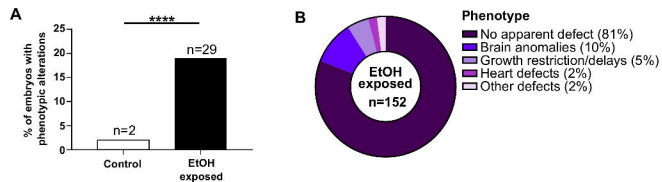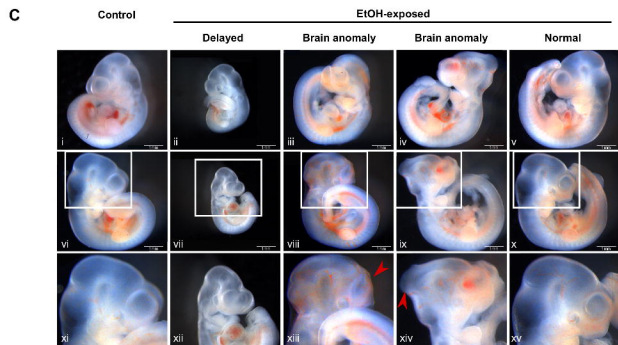

**D**

|                                          | Ctrl  | EtOH exposed | $\chi^2$ value | p-value |
|------------------------------------------|-------|--------------|----------------|---------|
| Embryos with phenotypic alterations      | 2/108 | 29/152       | 17.84          | <0.0001 |
| Mothers with at least one altered embryo | 2/16  | 16/22        | 13.48          | <0.001  |

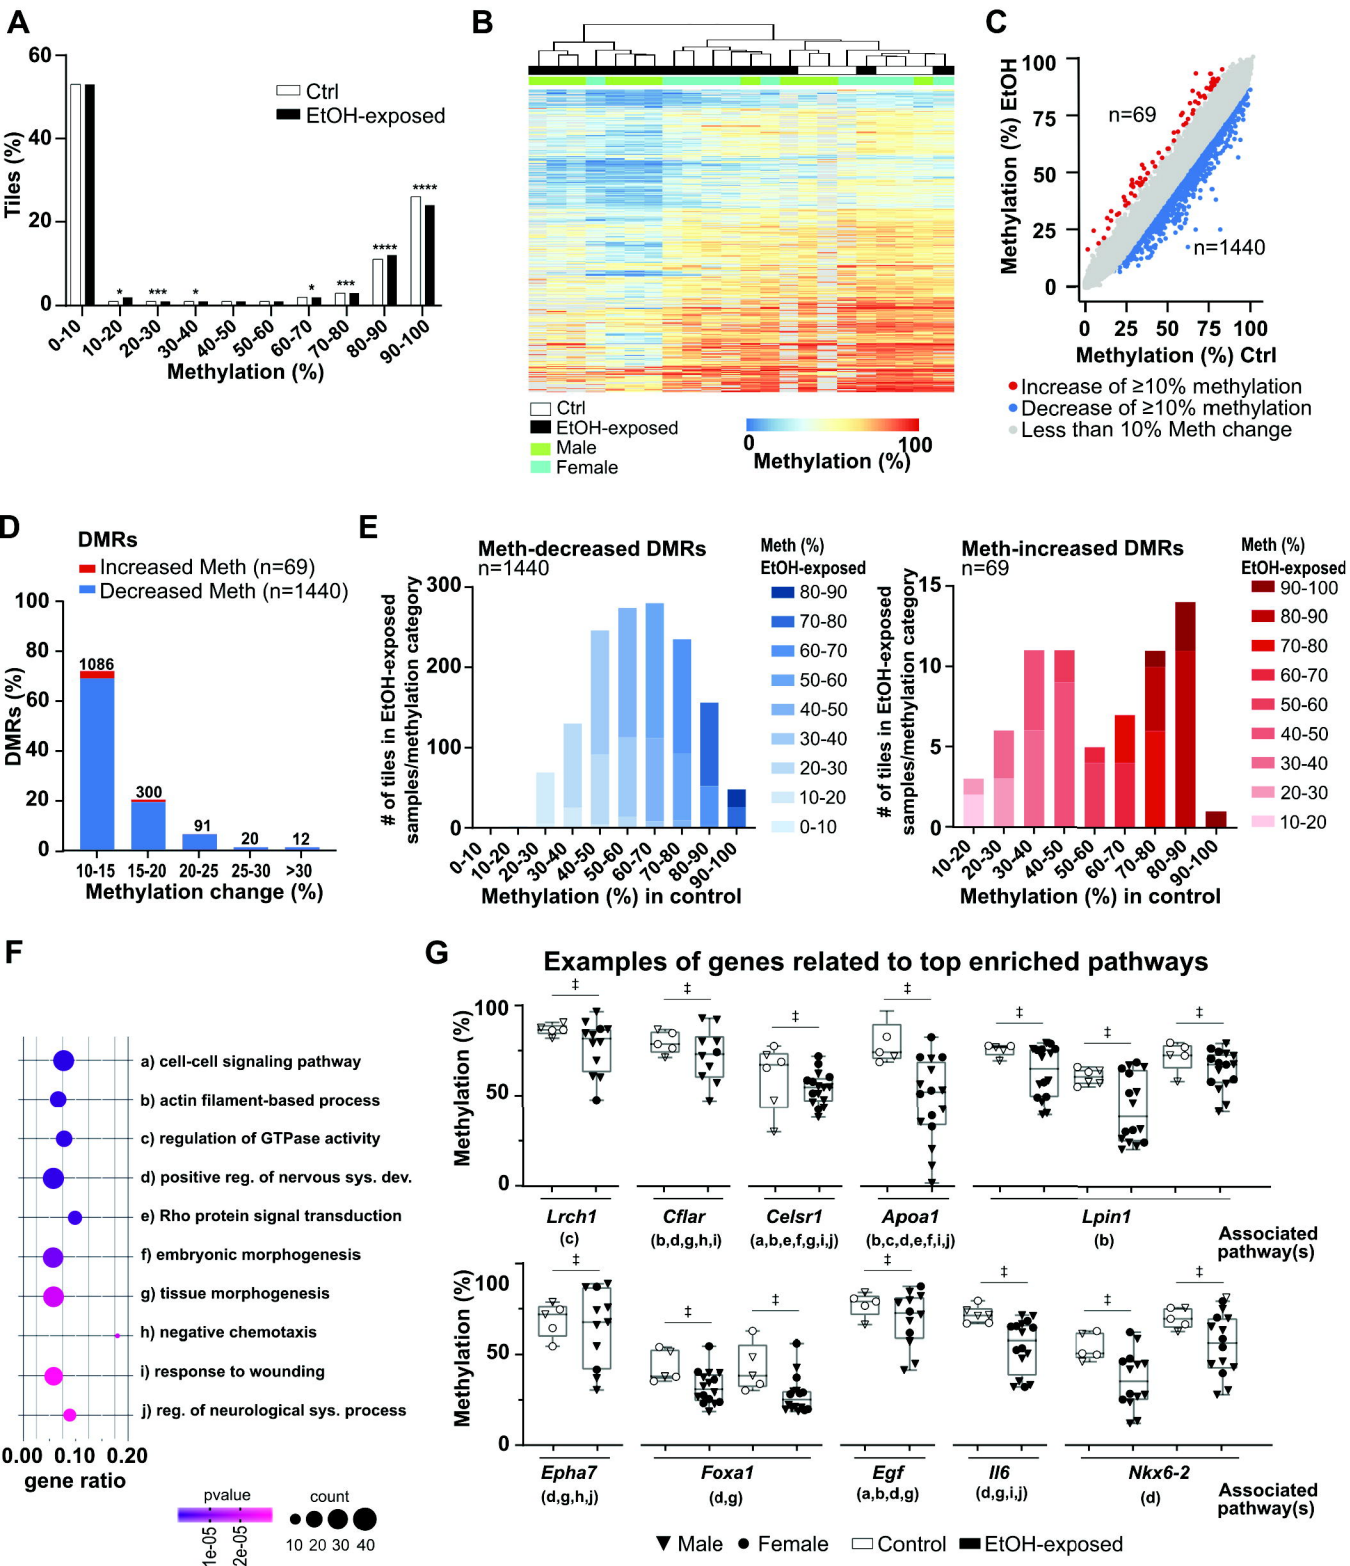

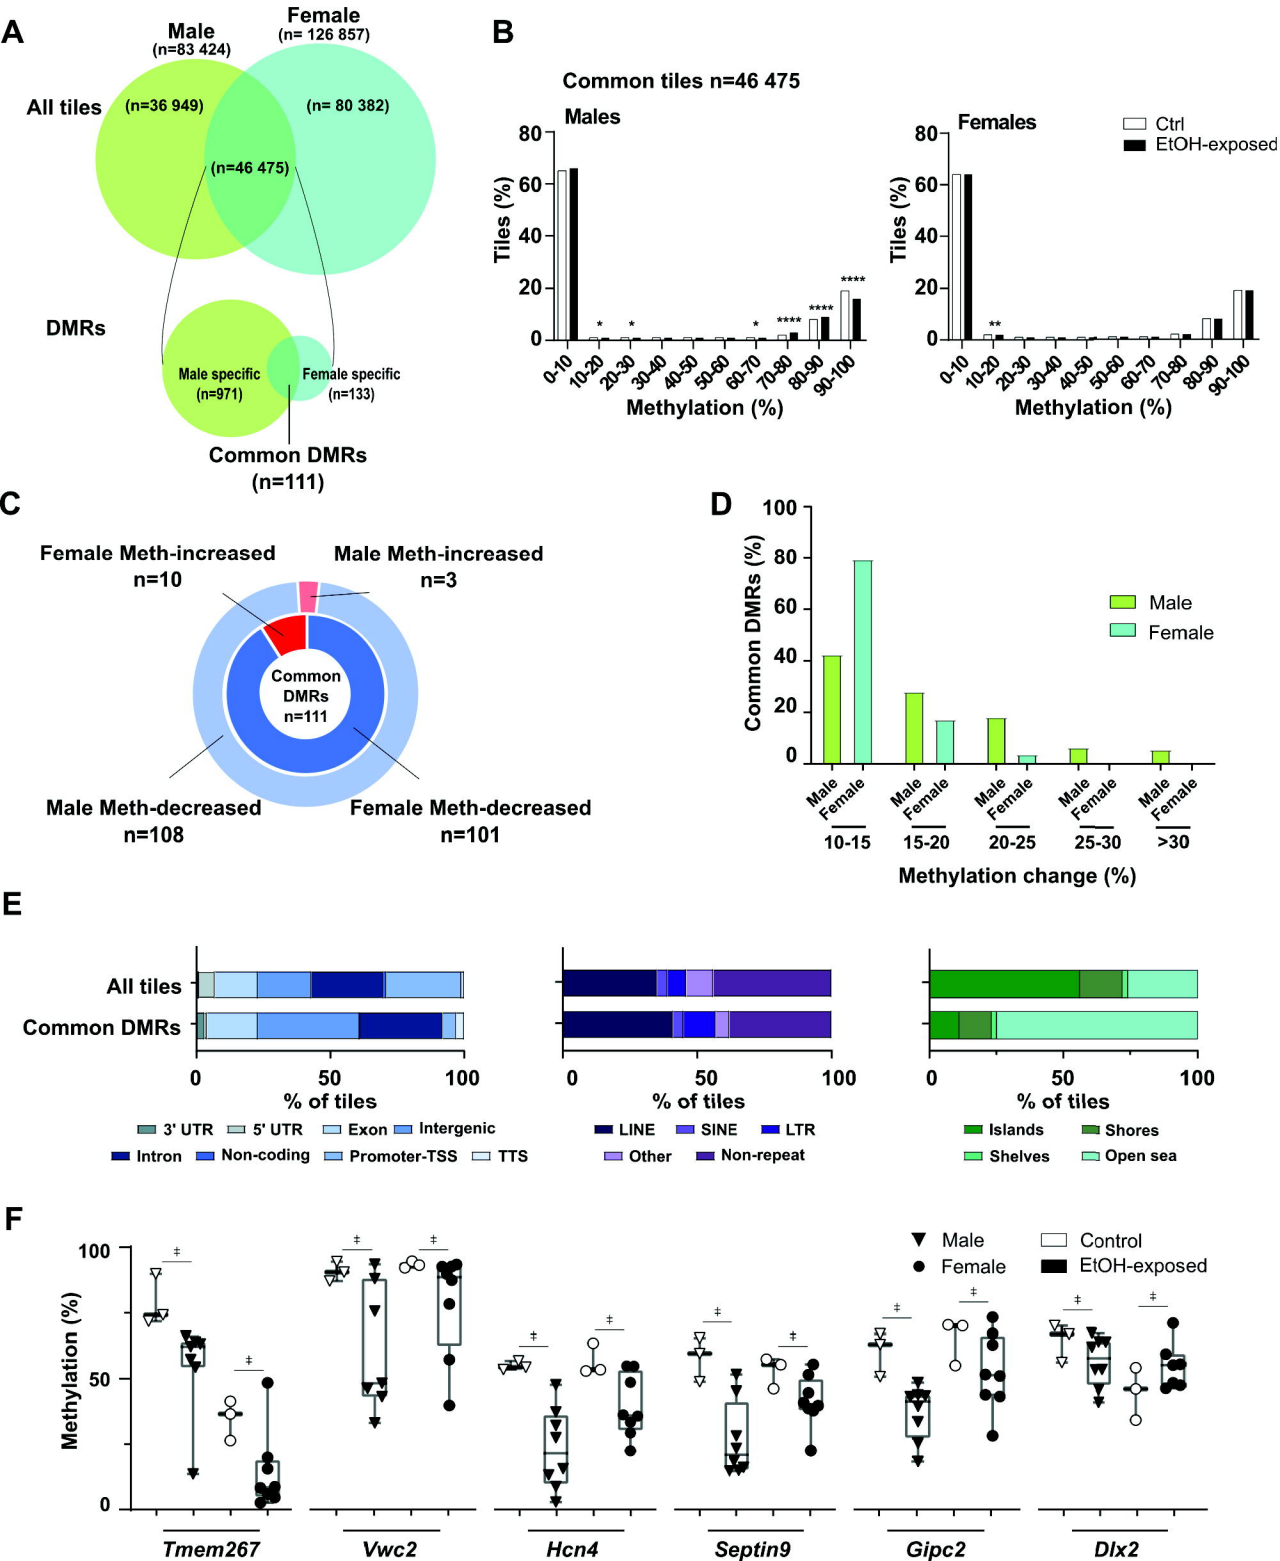



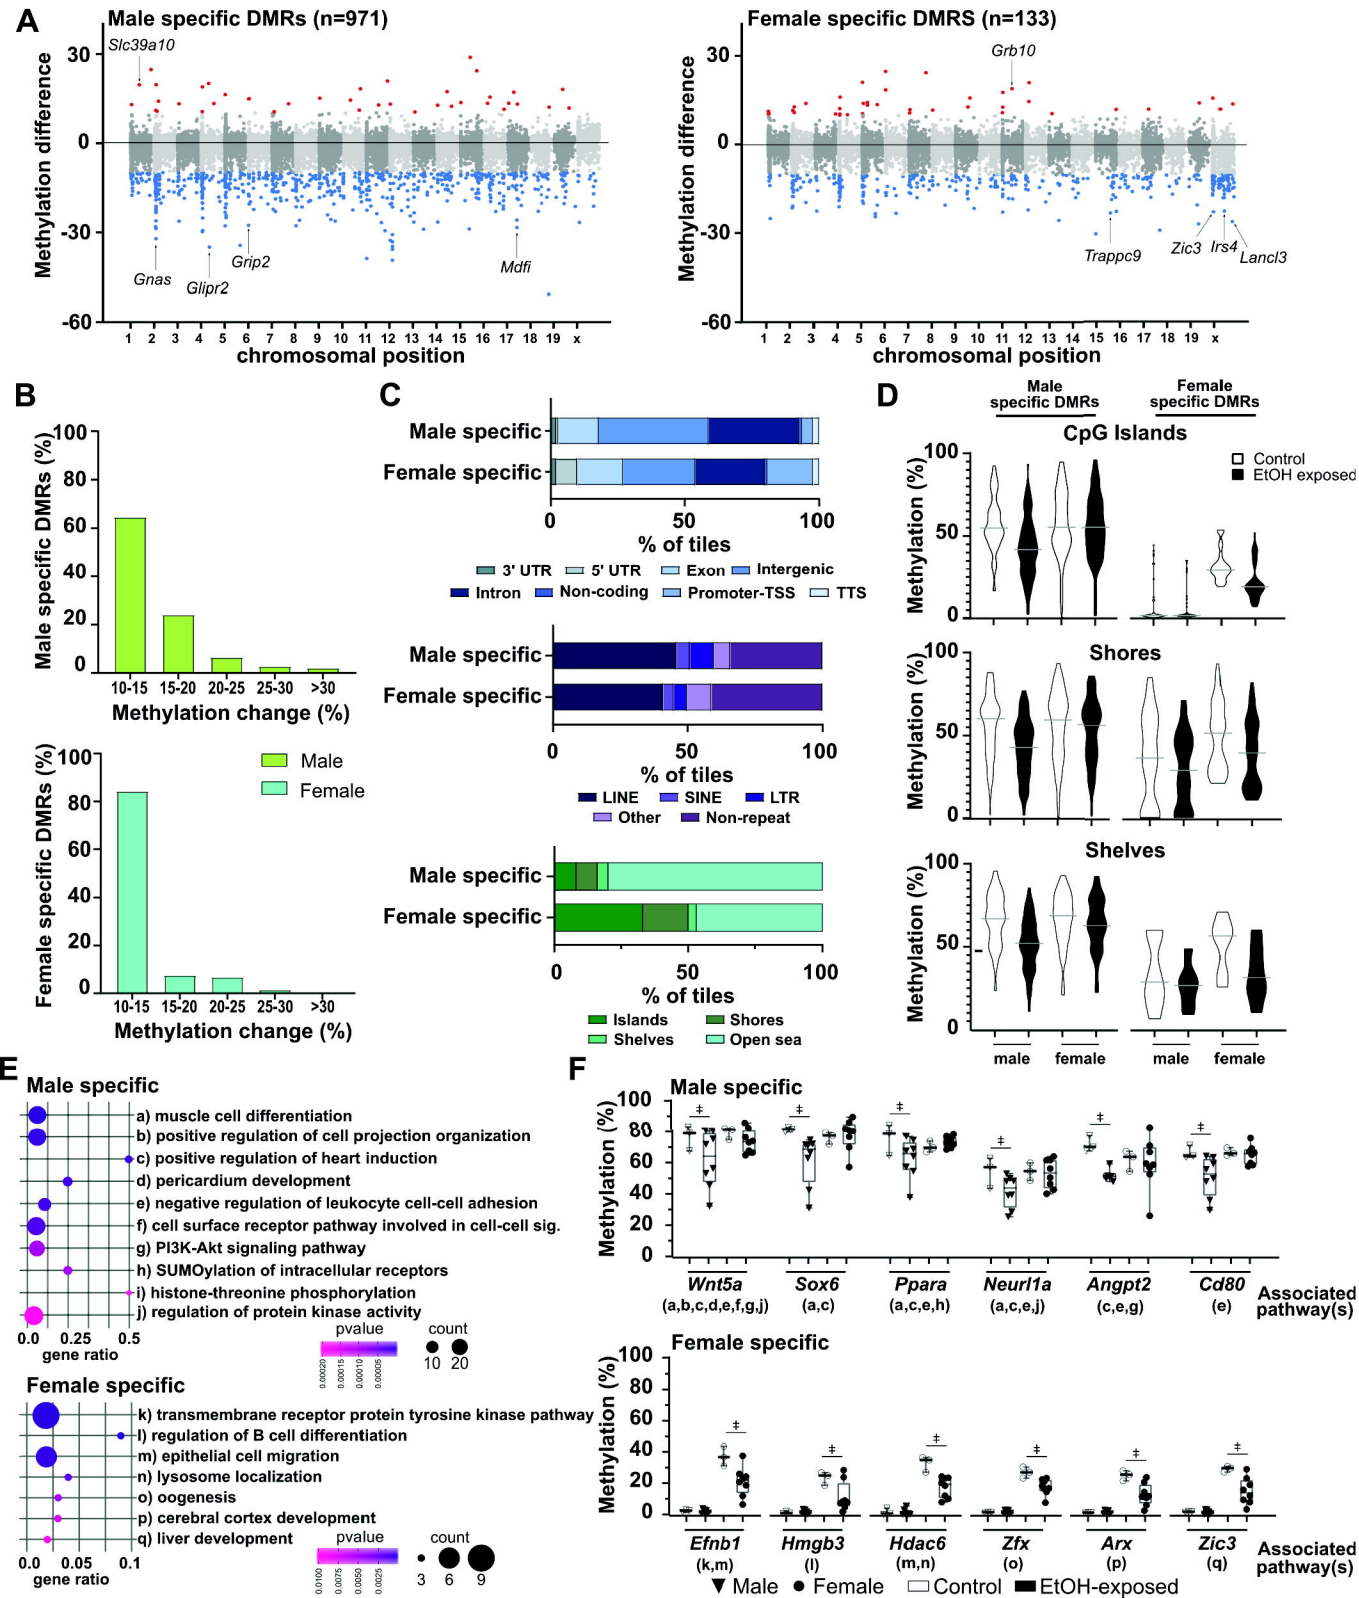

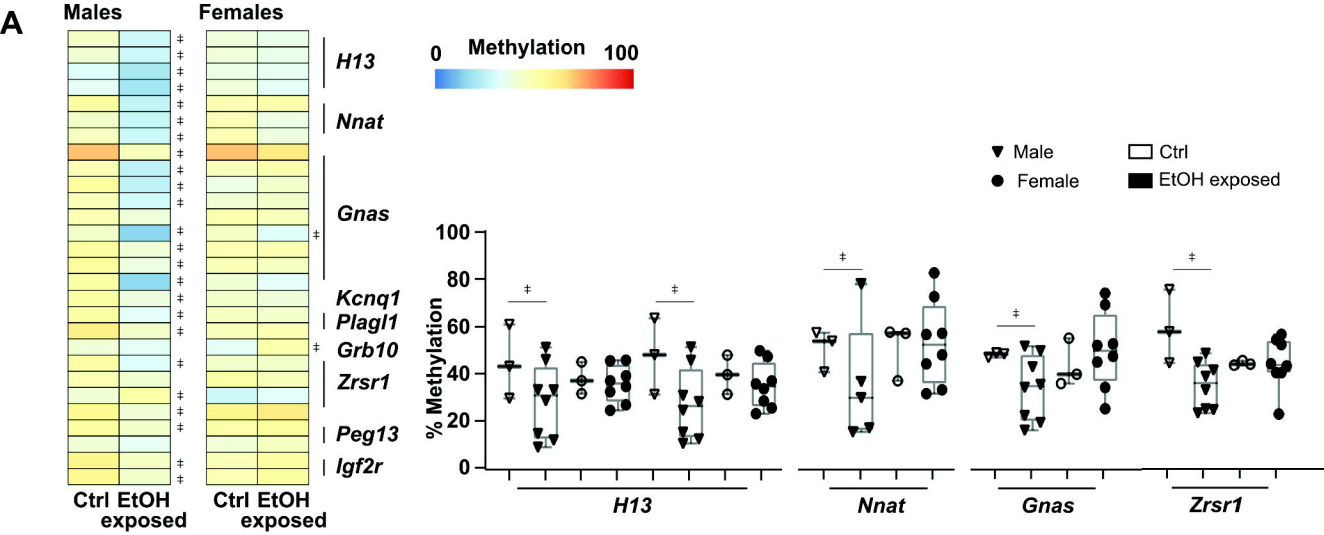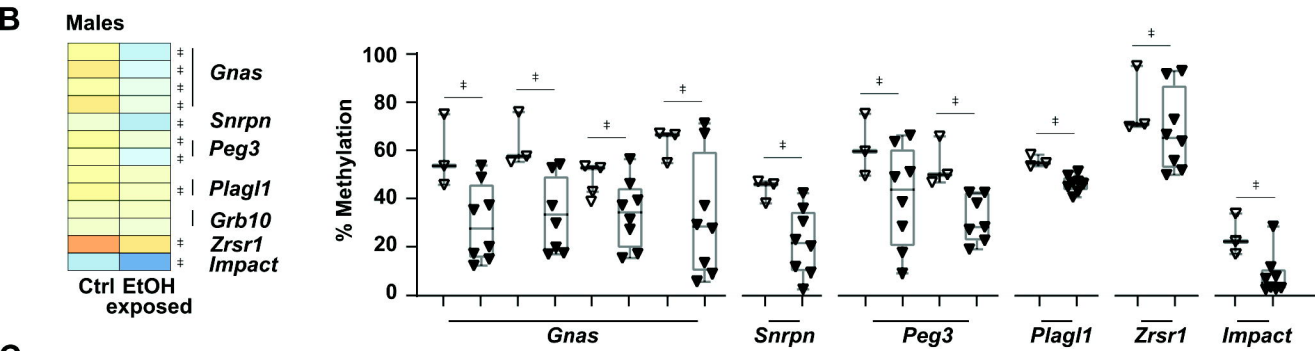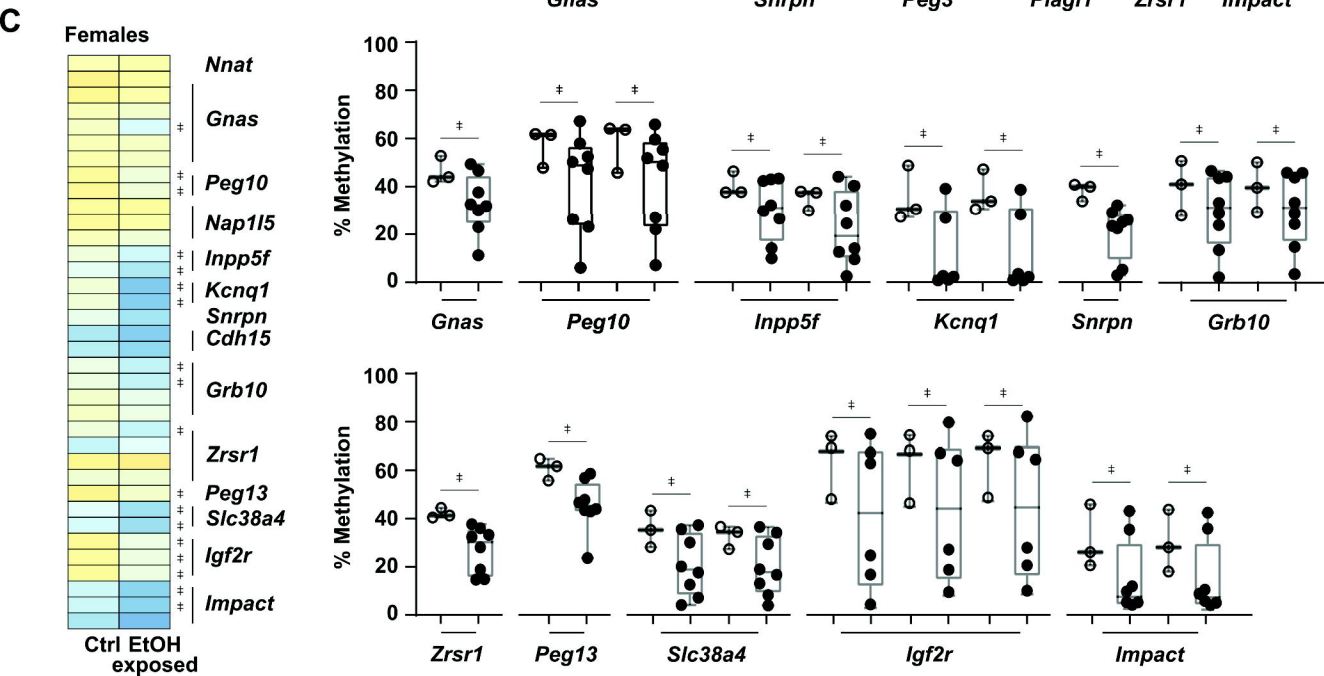

Source: https://www.biorxiv.org/content/10.1101/2020.12.07.415208v5.full.pdf
